# Supplementary material for: Matriptase activation of Gq drives epithelial disruption and inflammation via RSK and DUOX
Source: eLife. 2021 Jun 24;10:e66596. doi: 10.7554/eLife.66596 (PMC8291973; doi:10.7554/eLife.66596)
Supplement: Figure 1—source data 1. [file elife-66596-fig1-data1.xls]

## Sheet: Protein Peptide Summary
2011_07
NGSE110704
Analysis Information
	Report Type			Protein-Peptide Summary by Spot						Analysis Type					Combined (MS+MS/MS)
	Sample Set Name			NGSE110704						Database					NCBInr
	Analysis Name			Zebrafish						Creation Date
	Reported By									Last Modified
		MS Acq. : Proc. Methods				(Unspecified) : (Unspecified)
		Interpretation Method				(Unspecified)
Gel Idx/Pos			174/H1						Instr./Gel Origin			BA2060/110707A							Process Status		Analysis Succeeded
Plate [#] Name			[1] 31496						Instrument Sample Name										Spectra		11
Rank		Protein Name						Accession No.		Protein MW	Protein		Pep.		Protein		Protein	Total Ion	Total Ion
											PI		Count		Score		Score	Score	C. I. %
																	C. I. %
	1	pyruvate carboxylase, mitochondrial [Danio rerio]						gi|18858695		129802	6.44		21		295		100	219	100
		Peptide Information
		Calc. Mass		Obsrv. Mass	± da	± ppm	Start	End	Sequence					Ion	C. I. %		Modification					Rank	Result Type
							Seq.	Seq.						Score
		877.416	877.423		0.0068	8	388	395	GFQPDTGR														Mascot
		1064.53	1064.54		0.0104	10	720	727	YSLDYYLK														Mascot
		1100.61	1100.62		0.0084	8	140	149	FIGPSPEVVR														Mascot
		1111.59	1111.6		0.0098	9	574	583	DAHQSLLATR														Mascot
		1151.64	1151.65		0.0104	9	246	255	HIEVQILGDK														Mascot
		1164.58	1164.59		0.0127	11	322	330	HYFIEVNSR														Mascot
		1165.58	1165.76		0.1728	148	620	628	FLSECPWKR														Mascot
		1263.65	1263.66		0.015	12	256	265	YGNVIHLYER				59		99.97								Mascot
		1263.67	1263.66		-0.0061	-5	80	90	QKADEAYLIGR														Mascot
		1275.63	1275.61		-0.0185	-15	369	379	IQINGCAIQCR								Carbamidomethyl (C)[6]						Mascot
		1351.7	1351.71		0.0143	11	1076	1086	EVFFELNGQLR														Mascot
		1474.67	1474.69		0.0177	12	845	857	GLYAPFDCTATMK								Carbamidomethyl (C)[8]						Mascot
		1502.81	1502.8		-0.0106	-7	1132	1145	VEKGQPLCVLSAMK														Mascot
		1518.8	1518.79		-0.0116	-8	1132	1145	VEKGQPLCVLSAMK								Oxidation (M)[13]						Mascot
		1658.77	1658.94		0.1749	105	664	677	FCEVAKENGMDIFR														Mascot
		1658.77	1658.94		0.1749	105	664	677	FCEVAKENGMDIFR				3		0								Mascot
		1721.79	1721.81		0.0192	11	65	79	TVAVYSEQDTGQMHR														Mascot
		1737.79	1737.8		0.0175	10	65	79	TVAVYSEQDTGQMHR								Oxidation (M)[13]						Mascot
		1768.88	1768.89		0.0185	10	303	318	QVGYENAGTVEFLVDK														Mascot
		1800.86	1800.88		0.0248	14	647	663	GANAVGYTNYPDNAVFK														Mascot
		1857.94	1857.95		0.0164	9	222	239	AYSEALAAFGNGALFVEK														Mascot
		1993.94	1994		0.0609	31	65	81	TVAVYSEQDTGQMHRQK								Oxidation (M)[13]						Mascot
		2545.33	2545.36		0.0337	13	331	352	LQVEHTVTEEITDVDLVH				161		100								Mascot
									AQLR
		2545.33	2545.36		0.0337	13	331	352	LQVEHTVTEEITDVDLVH														Mascot
									AQLR
		3364.53	3364.61		0.083	25	858	888	SGNADVYENEIPGGQYT								Oxidation (M)[26]						Mascot
									NLHFQAHSMGLGNK
	2	Pc protein [Danio rerio]						gi|190338031		129917	6.44		21		294		100	219	100
		Peptide Information
		Calc. Mass		Obsrv. Mass	± da	± ppm	Start	End	Sequence					Ion	C. I. %		Modification					Rank	Result Type
							Seq.	Seq.						Score
		877.416	877.423		0.0068	8	388	395	GFQPDTGR														Mascot
		1064.53	1064.54		0.0104	10	720	727	YSLDYYLK														Mascot
		1100.61	1100.62		0.0084	8	140	149	FIGPSPEVVR														Mascot
		1111.59	1111.6		0.0098	9	574	583	DAHQSLLATR														Mascot
		1151.64	1151.65		0.0104	9	246	255	HIEVQILGDK														Mascot
		1164.58	1164.59		0.0127	11	322	330	HYFIEVNSR														Mascot
		1165.58	1165.76		0.1728	148	620	628	FLSECPWKR														Mascot
		1263.65	1263.66		0.015	12	256	265	YGNVIHLYER				59		99.97								Mascot
		1263.67	1263.66		-0.0061	-5	80	90	QKADEAYLIGR														Mascot
		1275.63	1275.61		-0.0185	-15	369	379	IQINGCAIQCR								Carbamidomethyl (C)[6]						Mascot
		1351.7	1351.71		0.0143	11	1077	1087	EVFFELNGQLR														Mascot
		1474.67	1474.69		0.0177	12	845	857	GLYAPFDCTATMK								Carbamidomethyl (C)[8]						Mascot
		1502.81	1502.8		-0.0106	-7	1133	1146	VEKGQPLCVLSAMK														Mascot
		1518.8	1518.79		-0.0116	-8	1133	1146	VEKGQPLCVLSAMK								Oxidation (M)[13]						Mascot
		1658.77	1658.94		0.1749	105	664	677	FCEVAKENGMDIFR														Mascot
		1658.77	1658.94		0.1749	105	664	677	FCEVAKENGMDIFR				3		0								Mascot
		1721.79	1721.81		0.0192	11	65	79	TVAVYSEQDTGQMHR														Mascot
		1737.79	1737.8		0.0175	10	65	79	TVAVYSEQDTGQMHR								Oxidation (M)[13]						Mascot
		1768.88	1768.89		0.0185	10	303	318	QVGYENAGTVEFLVDK														Mascot
		1800.86	1800.88		0.0248	14	647	663	GANAVGYTNYPDNAVFK														Mascot
		1857.94	1857.95		0.0164	9	222	239	AYSEALAAFGNGALFVEK														Mascot
		1993.94	1994		0.0609	31	65	81	TVAVYSEQDTGQMHRQK								Oxidation (M)[13]						Mascot
		2545.33	2545.36		0.0337	13	331	352	LQVEHTVTEEITDVDLVH				161		100								Mascot
									AQLR
		2545.33	2545.36		0.0337	13	331	352	LQVEHTVTEEITDVDLVH														Mascot
									AQLR
		3364.53	3364.61		0.083	25	858	888	SGNADVYENEIPGGQYT								Oxidation (M)[26]						Mascot
									NLHFQAHSMGLGNK
	3	pyruvate carboxylase [Danio rerio]						gi|169153894		51981.8	7.64		12		272		100	219	100
		Peptide Information
		Calc. Mass		Obsrv. Mass	± da	± ppm	Start	End	Sequence					Ion	C. I. %		Modification					Rank	Result Type
							Seq.	Seq.						Score
		877.416	877.423		0.0068	8	388	395	GFQPDTGR														Mascot
		1100.61	1100.62		0.0084	8	140	149	FIGPSPEVVR														Mascot
		1151.64	1151.65		0.0104	9	246	255	HIEVQILGDK														Mascot
		1164.58	1164.59		0.0127	11	322	330	HYFIEVNSR														Mascot
		1263.65	1263.66		0.015	12	256	265	YGNVIHLYER				59		99.97								Mascot
		1263.67	1263.66		-0.0061	-5	80	90	QKADEAYLIGR														Mascot
		1275.63	1275.61		-0.0185	-15	369	379	IQINGCAIQCR								Carbamidomethyl (C)[6]						Mascot
		1721.79	1721.81		0.0192	11	65	79	TVAVYSEQDTGQMHR														Mascot
		1737.79	1737.8		0.0175	10	65	79	TVAVYSEQDTGQMHR								Oxidation (M)[13]						Mascot
		1768.88	1768.89		0.0185	10	303	318	QVGYENAGTVEFLVDK														Mascot
		1857.94	1857.95		0.0164	9	222	239	AYSEALAAFGNGALFVEK														Mascot
		1993.94	1994		0.0609	31	65	81	TVAVYSEQDTGQMHRQK								Oxidation (M)[13]						Mascot
		2545.33	2545.36		0.0337	13	331	352	LQVEHTVTEEITDVDLVH				161		100								Mascot
									AQLR
		2545.33	2545.36		0.0337	13	331	352	LQVEHTVTEEITDVDLVH														Mascot
									AQLR
	4	novel protein similar to vertebrate vasodilator-stimulated						gi|169145929		44137.1	8.42		11		55		84.57
		phosphoprotein (VASP) [Danio rerio]
		Peptide Information
		Calc. Mass		Obsrv. Mass	± da	± ppm	Start	End	Sequence					Ion	C. I. %		Modification					Rank	Result Type
							Seq.	Seq.						Score
		980.447	980.426		-0.021	-21	2	10	SESSICQAR														Mascot
		1111.49	1111.6		0.1081	97	1	10	MSESSICQAR														Mascot
		1501.79	1501.66		-0.1311	-87	22	35	KWVPAGTGPQAFSR														Mascot
		1501.79	1501.66		-0.1311	-87	22	35	KWVPAGTGPQAFSR														Mascot
		1502.82	1502.8		-0.025	-17	404	416	NEIIGAFIQELQK														Mascot
		1561.73	1561.84		0.1107	71	72	83	YNQATPNFHQWR														Mascot
		1658.92	1658.94		0.019	11	404	417	NEIIGAFIQELQKR														Mascot
		1658.92	1658.94		0.019	11	404	417	NEIIGAFIQELQKR														Mascot
		1859.93	1859.93		0.0015	1	69	83	GLKYNQATPNFHQWR														Mascot
		1859.97	1859.93		-0.0404	-22	53	68	KMQTDQQVVINCPIVK								Oxidation (M)[2]						Mascot
		2176.98	2176.98		0	0	2	21	SESSICQARATVMIYDDG								Oxidation (M)[13]						Mascot
									SK
		2283.97	2284.2		0.2329	102	366	386	MKPVSQSAEAESGEGES								Oxidation (M)[1]						Mascot
									EMER
		2683.19	2683.24		0.0537	20	292	322	NSVSMPSGGGGGGGGG								Oxidation (M)[5,22,25]						Mascot
									GGGGLMGEMSAILAR
	5	Zgc:110347 [Danio rerio]						gi|62204405		21385.7	8.64		7		44		0
		Peptide Information
		Calc. Mass		Obsrv. Mass	± da	± ppm	Start	End	Sequence					Ion	C. I. %		Modification					Rank	Result Type
							Seq.	Seq.						Score
		980.447	980.426		-0.021	-21	2	10	SESSICQAR														Mascot
		1111.49	1111.6		0.1081	97	1	10	MSESSICQAR														Mascot
		1501.79	1501.66		-0.1311	-87	22	35	KWVPAGTGPQAFSR														Mascot
		1501.79	1501.66		-0.1311	-87	22	35	KWVPAGTGPQAFSR														Mascot
		1561.73	1561.84		0.1107	71	72	83	YNQATPNFHQWR														Mascot
		1859.93	1859.93		0.0015	1	69	83	GLKYNQATPNFHQWR														Mascot
		1859.97	1859.93		-0.0404	-22	53	68	KMQTDQQVVINCPIVK								Oxidation (M)[2]						Mascot
		2176.98	2176.98		0	0	2	21	SESSICQARATVMIYDDG								Oxidation (M)[13]						Mascot
									SK
	6	vasodilator-stimulated phosphoprotein [Danio rerio]						gi|237681322		46817.5	8.74		10		43		0
		Peptide Information
		Calc. Mass		Obsrv. Mass	± da	± ppm	Start	End	Sequence					Ion	C. I. %		Modification					Rank	Result Type
							Seq.	Seq.						Score
		980.447	980.426		-0.021	-21	2	10	SESSICQAR														Mascot
		1111.49	1111.6		0.1081	97	1	10	MSESSICQAR														Mascot
		1501.79	1501.66		-0.1311	-87	22	35	KWVPAGTGPQAFSR														Mascot
		1501.79	1501.66		-0.1311	-87	22	35	KWVPAGTGPQAFSR														Mascot
		1502.82	1502.8		-0.025	-17	429	441	NEIIGAFIQELQK														Mascot
		1561.73	1561.84		0.1107	71	72	83	YNQATPNFHQWR														Mascot
		1658.92	1658.94		0.019	11	429	442	NEIIGAFIQELQKR														Mascot
		1658.92	1658.94		0.019	11	429	442	NEIIGAFIQELQKR														Mascot
		1859.93	1859.93		0.0015	1	69	83	GLKYNQATPNFHQWR														Mascot
		1859.97	1859.93		-0.0404	-22	53	68	KMQTDQQVVINCPIVK								Oxidation (M)[2]						Mascot
		2176.98	2176.98		0	0	2	21	SESSICQARATVMIYDDG								Oxidation (M)[13]						Mascot
									SK
		2283.97	2284.2		0.2329	102	391	411	MKPVSQSAEAESGEGES								Oxidation (M)[1]						Mascot
									EMER
	7	novel NACHT domain containing protein [Danio rerio]						gi|157886383		55615.1	5.32		10		42		0
		Peptide Information
		Calc. Mass		Obsrv. Mass	± da	± ppm	Start	End	Sequence					Ion	C. I. %		Modification					Rank	Result Type
							Seq.	Seq.						Score
		964.528	964.429		-0.0997	-103	410	417	VAFQQLMK														Mascot
		980.523	980.426		-0.0978	-100	410	417	VAFQQLMK								Oxidation (M)[7]						Mascot
		1077.55	1077.53		-0.0228	-21	398	406	LTDEDMILK														Mascot
		1139.48	1139.51		0.0319	28	39	48	SSEPSCVSMR								Carbamidomethyl (C)[6]						Mascot
		1280.52	1280.61		0.0827	65	3	13	SDPEPSCVSMR								Carbamidomethyl (C)[7], Oxidation (M)[10]						Mascot
		1322.55	1322.66		0.1144	86	14	24	SDSMDQPMHFK														Mascot
		1363.61	1363.69		0.0791	58	2	13	RSDPEPSCVSMR														Mascot
		1363.61	1363.69		0.0791	58	2	13	RSDPEPSCVSMR														Mascot
		1379.6	1379.65		0.0464	34	2	13	RSDPEPSCVSMR								Oxidation (M)[11]						Mascot
		1483.73	1483.65		-0.0731	-49	234	245	VLFIFDGLDECR								Carbamidomethyl (C)[11]						Mascot
		2318.08	2318.23		0.1538	66	429	449	ECGIDVAEASVYSGLCTQ								Carbamidomethyl (C)[2]						Mascot
									IFR
		2661.24	2661.24		-0.0037	-1	49	72	SDDESVHQPLHVKSGDT														Mascot
									ETDLSHK
		3364.75	3364.61		-0.1416	-42	361	389	MLSEAETAEIPKTLTQMY														Mascot
									THFLILQTNIK
	8	GR [Danio rerio]						gi|68132008		35860.4	9.13		11		42		0
		Peptide Information
		Calc. Mass		Obsrv. Mass	± da	± ppm	Start	End	Sequence					Ion	C. I. %		Modification					Rank	Result Type
							Seq.	Seq.						Score
		877.408	877.423		0.0147	17	16	22	NDCIIDK								Carbamidomethyl (C)[3]						Mascot
		1045.59	1045.57		-0.024	-23	135	143	WAKALPGFR														Mascot
		1351.64	1351.71		0.0697	52	302	313	SLSVEFPEMLAE														Mascot
		1352.65	1352.7		0.0565	42	35	46	KCLMAGMNLEAR								Oxidation (M)[4]						Mascot
		1352.65	1352.7		0.0565	42	36	47	CLMAGMNLEARK								Oxidation (M)[3]						Mascot
		1474.69	1474.69		0.0027	2	3	15	AVEGQHNYLCAGR								Carbamidomethyl (C)[10]						Mascot
		1658.72	1658.94		0.2191	132	194	206	LPYMSDQCEQMLK								Carbamidomethyl (C)[8], Oxidation (M)[4]						Mascot
		1658.72	1658.94		0.2191	132	194	206	LPYMSDQCEQMLK								Carbamidomethyl (C)[8], Oxidation (M)[4]						Mascot
		1860.84	1860.92		0.0875	47	192	206	MKLPYMSDQCEQMLK								Oxidation (M)[1]						Mascot
		2284.1	2284.2		0.1055	46	96	116	AIEPDTLYAGYDSTIPDTS														Mascot
									VR
		2362.14	2362.12		-0.0244	-10	207	225	ISNEFVRLQVSTEEYLCM								Carbamidomethyl (C)[17], Oxidation (M)[18]						Mascot
									K
		2683.17	2683.24		0.0708	26	170	191	SYQHCNGNMLCFAPDLV								Carbamidomethyl (C)[5,11], Oxidation (M)[9]						Mascot
									INEER
	9	novel NACHT domain containing protein [Danio rerio]						gi|157886384		52335.5	5.14		10		42		0
		Peptide Information
		Calc. Mass		Obsrv. Mass	± da	± ppm	Start	End	Sequence					Ion	C. I. %		Modification					Rank	Result Type
							Seq.	Seq.						Score
		964.528	964.429		-0.0997	-103	412	419	VAFQQLMK														Mascot
		980.523	980.426		-0.0978	-100	412	419	VAFQQLMK								Oxidation (M)[7]						Mascot
		1077.55	1077.53		-0.0228	-21	400	408	LTDEDMILK														Mascot
		1151.48	1151.65		0.1703	148	42	51	EADPSCVSMR								Carbamidomethyl (C)[6]						Mascot
		1423.69	1423.76		0.0739	52	52	63	SDTFMNQPINIK								Oxidation (M)[5]						Mascot
		1483.73	1483.65		-0.0731	-49	236	247	VLFIFDGLDECR								Carbamidomethyl (C)[11]						Mascot
		1545.78	1545.85		0.0613	40	145	157	CRDIFTPLPGQNK								Carbamidomethyl (C)[1]						Mascot
		1561.73	1561.84		0.1127	72	3	16	SEPEPSCVSIRSDR														Mascot
		1658.78	1658.94		0.1645	99	26	39	SEDTQTHLSTFHQK														Mascot
		1658.78	1658.94		0.1645	99	26	39	SEDTQTHLSTFHQK														Mascot
		2318.08	2318.23		0.1538	66	431	451	ECGIDVAEASVYSGLCTQ								Carbamidomethyl (C)[2]						Mascot
									IFR
		3364.75	3364.61		-0.1416	-42	363	391	MLSEAETAEIPKTLTQMY														Mascot
									THFLILQTNIK
	10	PREDICTED: copine-4-like [Danio rerio]						gi|189530019		62246.7	5.53		11		39		0
		Peptide Information
		Calc. Mass		Obsrv. Mass	± da	± ppm	Start	End	Sequence					Ion	C. I. %		Modification					Rank	Result Type
							Seq.	Seq.						Score
		996.482	996.605		0.1234	124	66	74	SCINPTFSK														Mascot
		1100.53	1100.62		0.0838	76	354	363	MFPAFGFGAR														Mascot
		1139.57	1139.51		-0.0593	-52	172	180	SDPFLEIYR														Mascot
		1363.63	1363.69		0.0574	42	417	428	VANFASEEMHTK														Mascot
		1363.63	1363.69		0.0574	42	417	428	VANFASEEMHTK														Mascot
		1379.63	1379.65		0.0246	18	417	428	VANFASEEMHTK								Oxidation (M)[9]						Mascot
		1483.63	1483.65		0.0248	17	541	553	CPSEFESSRTFGH														Mascot
		1501.69	1501.66		-0.0253	-17	49	60	MQSHGQWLEVDR								Oxidation (M)[1]						Mascot
		1501.69	1501.66		-0.0253	-17	49	60	MQSHGQWLEVDR								Oxidation (M)[1]						Mascot
		1545.77	1545.85		0.0726	47	193	205	TETVMNNLNPVWK														Mascot
		1561.77	1561.84		0.0723	46	193	205	TETVMNNLNPVWK								Oxidation (M)[5]						Mascot
		1593.84	1593.74		-0.1024	-64	273	286	NYKNSGIVILNQCK														Mascot
		1593.84	1593.74		-0.1024	-64	273	286	NYKNSGIVILNQCK														Mascot
		1721.83	1721.81		-0.0212	-12	222	235	ILKCTVWDWDSNGK								Carbamidomethyl (C)[4]						Mascot
		2225.04	2225.15		0.1123	50	104	123	EADCLGAMECTLGQIVS								Carbamidomethyl (C)[4], Oxidation (M)[8]						Mascot
									QRK
		2661.31	2661.24		-0.0798	-30	429	451	EAMQYFILLILTDGVITDM								Oxidation (M)[3,19]						Mascot
									ADTR
Gel Idx/Pos			175/H2						Instr./Gel Origin			BA2060/110707A							Process Status		Analysis Succeeded
Plate [#] Name			[1] 31496						Instrument Sample Name										Spectra		11
Rank		Protein Name						Accession No.		Protein MW	Protein		Pep.		Protein		Protein	Total Ion	Total Ion
											PI		Count		Score		Score	Score	C. I. %
																	C. I. %
	1	novel protein similar to H.sapiens NCL, nucleolin (NCL,						gi|220672795		74887.4	4.62		19		557		100	459	100
		zgc:152810) [Danio rerio]
		Peptide Information
		Calc. Mass		Obsrv. Mass	± da	± ppm	Start	End	Sequence					Ion	C. I. %		Modification					Rank	Result Type
							Seq.	Seq.						Score
		882.577	882.572		-0.0053	-6	349	356	KLLGQPVK														Mascot
		940.514	940.521		0.0072	8	414	421	GIAYIEFK														Mascot
		1022.49	1022.5		0.0108	11	571	580	DSFDGAIAAR														Mascot
		1024.47	1024.52		0.0537	52	532	539	LEYSQNDR														Mascot
		1058.55	1058.56		0.0093	9	313	321	EGLEIQDVR														Mascot
		1146.6	1146.64		0.0367	32	689	699	GGFGDRPQGKK														Mascot
		1205.62	1205.63		0.0094	8	394	403	EIFDQAVDIR				86		100								Mascot
		1205.62	1205.63		0.0094	8	394	403	EIFDQAVDIR														Mascot
		1252.64	1252.73		0.0929	74	298	308	DFDELKSAISK														Mascot
		1309.61	1309.62		0.0087	7	532	541	LEYSQNDRER														Mascot
		1359.65	1359.66		0.0104	8	429	441	ALEEAQGSDVQGR														Mascot
		1380.69	1380.69		-0.0001	0	529	539	SIRLEYSQNDR														Mascot
		1434.72	1434.73		0.0109	8	382	393	NLPYSITQDDLR														Mascot
		1434.72	1434.73		0.0109	8	382	393	NLPYSITQDDLR				97		100								Mascot
		1563.7	1563.75		0.0539	34	606	620	AAKEAMDDGEIDGNK														Mascot
		1563.7	1563.75		0.0539	34	606	620	AAKEAMDDGEIDGNK														Mascot
		1661.77	1661.78		0.0122	7	328	341	FGYVDFASEEELQK														Mascot
		1677.68	1677.7		0.0142	8	592	605	GFGFVDFDNEQDCK				74		99.999		Carbamidomethyl (C)[13]						Mascot
		1677.68	1677.7		0.0142	8	592	605	GFGFVDFDNEQDCK								Carbamidomethyl (C)[13]						Mascot
		2297.09	2297.15		0.064	28	559	580	GLSDDTTDQTLKDSFDG														Mascot
									AIAAR
		2396.23	2396.27		0.031	13	465	486	VLVVNNLAFSASEDSLQS														Mascot
									VFEK
		2587.23	2587.27		0.0363	14	281	303	TDGEGFSLFLGNLNNNK														Mascot
									DFDELK
		3249.43	3249.47		0.0434	13	501	528	GYAFVEFENVEDSKEALE								Carbamidomethyl (C)[20]						Mascot
									NCNNTDIEGR
		3249.43	3249.47		0.0434	13	501	528	GYAFVEFENVEDSKEALE				202		100		Carbamidomethyl (C)[20]						Mascot
									NCNNTDIEGR
	2	nucleolin [Danio rerio]						gi|49618989		70862.8	4.74		17		543		100	459	100
		Peptide Information
		Calc. Mass		Obsrv. Mass	± da	± ppm	Start	End	Sequence					Ion	C. I. %		Modification					Rank	Result Type
							Seq.	Seq.						Score
		882.577	882.572		-0.0053	-6	312	319	KLLGQPVK														Mascot
		1022.49	1022.5		0.0108	11	534	543	DSFDGAIAAR														Mascot
		1024.47	1024.52		0.0537	52	495	502	LEYSQNDR														Mascot
		1058.55	1058.56		0.0093	9	276	284	EGLEIQDVR														Mascot
		1205.62	1205.63		0.0094	8	357	366	EIFDQAVDIR				86		100								Mascot
		1205.62	1205.63		0.0094	8	357	366	EIFDQAVDIR														Mascot
		1252.64	1252.73		0.0929	74	261	271	DFDELKSAISK														Mascot
		1309.61	1309.62		0.0087	7	495	504	LEYSQNDRER														Mascot
		1359.65	1359.66		0.0104	8	392	404	ALEEAQGSDVQGR														Mascot
		1380.69	1380.69		-0.0001	0	492	502	SIRLEYSQNDR														Mascot
		1434.72	1434.73		0.0109	8	345	356	NLPYSITQDDLR														Mascot
		1434.72	1434.73		0.0109	8	345	356	NLPYSITQDDLR				97		100								Mascot
		1563.7	1563.75		0.0539	34	569	583	AAKEAMDDGEIDGNK														Mascot
		1563.7	1563.75		0.0539	34	569	583	AAKEAMDDGEIDGNK														Mascot
		1661.77	1661.78		0.0122	7	291	304	FGYVDFASEEELQK														Mascot
		1677.68	1677.7		0.0142	8	555	568	GFGFVDFDNEQDCK				74		99.999		Carbamidomethyl (C)[13]						Mascot
		1677.68	1677.7		0.0142	8	555	568	GFGFVDFDNEQDCK								Carbamidomethyl (C)[13]						Mascot
		2297.09	2297.15		0.064	28	522	543	GLSDDTTDQTLKDSFDG														Mascot
									AIAAR
		2396.23	2396.27		0.031	13	428	449	VLVVNNLAFSASEDSLQS														Mascot
									VFEK
		2587.23	2587.27		0.0363	14	244	266	TDGEGFSLFLGNLNNNK														Mascot
									DFDELK
		3249.43	3249.47		0.0434	13	464	491	GYAFVEFENVEDSKEALE								Carbamidomethyl (C)[20]						Mascot
									NCNNTDIEGR
		3249.43	3249.47		0.0434	13	464	491	GYAFVEFENVEDSKEALE				202		100		Carbamidomethyl (C)[20]						Mascot
									NCNNTDIEGR
	3	PREDICTED: neutral alpha-glucosidase AB-like [Danio						gi|292621001		106710	5.34		25		389		100	256	100
		rerio]
		Peptide Information
		Calc. Mass		Obsrv. Mass	± da	± ppm	Start	End	Sequence					Ion	C. I. %		Modification					Rank	Result Type
							Seq.	Seq.						Score
		883.442	883.447		0.0054	6	595	602	AFFAGSQR														Mascot
		973.506	973.518		0.0115	12	574	582	ATAEGQIQR														Mascot
		1041.58	1041.59		0.0072	7	168	176	GLLGFEHLR														Mascot
		1058.65	1058.56		-0.09	-85	143	151	LIVSARPFR														Mascot
		1155.69	1155.7		0.0096	8	79	87	VHLLLELYR														Mascot
		1231.52	1231.68		0.1655	134	34	43	TCDQSSFCKR								Carbamidomethyl (C)[2]						Mascot
		1252.6	1252.73		0.1325	106	444	453	EMLQGLMDKR								Oxidation (M)[2,7]						Mascot
		1317.73	1317.74		0.0094	7	583	594	SGGVERPFVLTR														Mascot
		1317.73	1317.74		0.0094	7	583	594	SGGVERPFVLTR				8		0								Mascot
		1332.7	1332.71		0.0094	7	56	67	ALLDTLELSDSR														Mascot
		1434.92	1434.73		-0.1821	-127	95	106	VKINELKPLKPR														Mascot
		1434.92	1434.73		-0.1821	-127	95	106	VKINELKPLKPR														Mascot
		1448.75	1448.76		0.0038	3	562	573	DVHNIYGLYVQK														Mascot
		1451.75	1451.76		0.01	7	743	755	DLLVHPVTEEGSR														Mascot
		1563.74	1563.75		0.0116	7	655	666	WYQTGAYQPFFR														Mascot
		1563.74	1563.75		0.0116	7	655	666	WYQTGAYQPFFR				91		100								Mascot
		1642.86	1642.87		0.0089	5	677	690	EPWLFGPENTALIR														Mascot
		1691.82	1691.83		0.0117	7	431	443	YFTWDPHKFPEPK														Mascot
		1727.85	1727.86		0.0135	8	728	742	ETATFTIDDEFLIGR														Mascot
		1727.85	1727.86		0.0135	8	728	742	ETATFTIDDEFLIGR				115		100								Mascot
		1785.94	1785.96		0.0164	9	152	167	LDIMEGPEVLLSLNSR														Mascot
		1798.96	1798.97		0.0124	7	676	690	REPWLFGPENTALIR														Mascot
		1798.96	1798.97		0.0124	7	676	690	REPWLFGPENTALIR				43		98.55								Mascot
		1860.87	1860.88		0.0155	8	603	619	YGAVWTGDNAADWGHL														Mascot
									K
		1909.9	1909.91		0.0148	8	331	347	MLDFVQGSSETPQTDVR														Mascot
		1925.89	1925.91		0.0192	10	331	347	MLDFVQGSSETPQTDVR								Oxidation (M)[1]						Mascot
		2028.07	2028.07		0.0022	1	921	938	KPGINAGMDWTILLQSQR														Mascot
		2044.06	2044.09		0.023	11	921	938	KPGINAGMDWTILLQSQR								Oxidation (M)[8]						Mascot
		2071.01	2071.02		0.0154	7	903	920	ETPVEFEFDASMSVLTLR														Mascot
		2087	2087.02		0.0174	8	903	920	ETPVEFEFDASMSVLTLR								Oxidation (M)[12]						Mascot
		2233.05	2233.11		0.0569	25	811	830	SSACMENDPYTLYVALS								Oxidation (M)[5]						Mascot
									PKK
		2354.26	2354.24		-0.0247	-10	777	797	HNGAQNLYIPVTLSSIPVF														Mascot
									QR
		2677.09	2677.11		0.0273	10	490	511	NYEGWCWPGNSGYPDF								Carbamidomethyl (C)[6]						Mascot
									TNPEMR
	4	PREDICTED: neutral alpha-glucosidase AB-like [Danio						gi|326673856		84660.6	5.01		19		272		100	178	100
		rerio]
		Peptide Information
		Calc. Mass		Obsrv. Mass	± da	± ppm	Start	End	Sequence					Ion	C. I. %		Modification					Rank	Result Type
							Seq.	Seq.						Score
		883.442	883.447		0.0054	6	595	602	AFFAGSQR														Mascot
		973.506	973.518		0.0115	12	574	582	ATAEGQIQR														Mascot
		1055.6	1055.61		0.0064	6	168	176	GLLAFEHLR				37		94.65								Mascot
		1055.6	1055.61		0.0064	6	168	176	GLLAFEHLR														Mascot
		1058.65	1058.56		-0.09	-85	143	151	LIVSARPFR														Mascot
		1146.63	1146.64		0.0115	10	46	55	TLKPGQSPYR														Mascot
		1155.69	1155.7		0.0096	8	79	87	VHLLLELYR														Mascot
		1231.52	1231.68		0.1655	134	34	43	TCDQSSFCKR								Carbamidomethyl (C)[2]						Mascot
		1317.73	1317.74		0.0094	7	583	594	SGGVERPFVLTR														Mascot
		1317.73	1317.74		0.0094	7	583	594	SGGVERPFVLTR				8		0								Mascot
		1332.7	1332.71		0.0094	7	56	67	ALLDTLELSDSR														Mascot
		1434.92	1434.73		-0.1821	-127	95	106	VKINELKPLKPR														Mascot
		1434.92	1434.73		-0.1821	-127	95	106	VKINELKPLKPR														Mascot
		1448.75	1448.76		0.0038	3	562	573	DVHNIYGLYVQK														Mascot
		1563.74	1563.75		0.0116	7	655	666	WYQTGAYQPFFR														Mascot
		1563.74	1563.75		0.0116	7	655	666	WYQTGAYQPFFR				91		100								Mascot
		1642.86	1642.87		0.0089	5	677	690	EPWLFGPENTALIR														Mascot
		1691.82	1691.83		0.0117	7	431	443	YFTWDPHKFPEPK														Mascot
		1785.94	1785.96		0.0164	9	152	167	LDIMEGPEVLLSLNSR														Mascot
		1798.96	1798.97		0.0124	7	676	690	REPWLFGPENTALIR														Mascot
		1798.96	1798.97		0.0124	7	676	690	REPWLFGPENTALIR				43		98.55								Mascot
		1860.87	1860.88		0.0155	8	603	619	YGAVWTGDNAADWGHL														Mascot
									K
		1909.9	1909.91		0.0148	8	331	347	MLDFVQGSSETPQTDVR														Mascot
		1925.89	1925.91		0.0192	10	331	347	MLDFVQGSSETPQTDVR								Oxidation (M)[1]						Mascot
		2677.09	2677.11		0.0273	10	490	511	NYEGWCWPGNSGYPDF								Carbamidomethyl (C)[6]						Mascot
									TNPEMR
	5	Zgc:171967 protein [Danio rerio]						gi|190339135		104065	5.22		12		120		100	88	100
		Peptide Information
		Calc. Mass		Obsrv. Mass	± da	± ppm	Start	End	Sequence					Ion	C. I. %		Modification					Rank	Result Type
							Seq.	Seq.						Score
		883.442	883.447		0.0054	6	576	583	AFFAGSQR														Mascot
		996.559	996.602		0.0433	43	453	460	IHNEIRSK														Mascot
		1055.6	1055.61		0.0064	6	163	171	GLLAFEHLR				37		94.65								Mascot
		1055.6	1055.61		0.0064	6	163	171	GLLAFEHLR														Mascot
		1205.58	1205.63		0.0444	37	533	542	DAVHGVWEHR														Mascot
		1205.58	1205.63		0.0444	37	533	542	DAVHGVWEHR														Mascot
		1231.52	1231.68		0.1655	134	29	38	TCDQSSFCKR								Carbamidomethyl (C)[2]						Mascot
		1309.64	1309.62		-0.0164	-13	253	263	LKSTENSDPYR														Mascot
		1317.73	1317.74		0.0094	7	564	575	SGGVERPFVLTR														Mascot
		1317.73	1317.74		0.0094	7	564	575	SGGVERPFVLTR				8		0								Mascot
		1332.7	1332.71		0.0094	7	51	62	ALLDTLELSDSR														Mascot
		1434.92	1434.73		-0.1821	-127	90	101	VKINELKPIKPR														Mascot
		1434.92	1434.73		-0.1821	-127	90	101	VKINELKPIKPR														Mascot
		1448.75	1448.76		0.0038	3	543	554	DVHNLYGLYVQK														Mascot
		1642.86	1642.87		0.0089	5	658	671	EPWLFGPENTALIR														Mascot
		1798.96	1798.97		0.0124	7	657	671	REPWLFGPENTALIR														Mascot
		1798.96	1798.97		0.0124	7	657	671	REPWLFGPENTALIR				43		98.55								Mascot
	6	hypothetical protein LOC100126019 [Danio rerio]						gi|157787145		49134.9	8.2		6		69		99.477	51	99.767
		Peptide Information
		Calc. Mass		Obsrv. Mass	± da	± ppm	Start	End	Sequence					Ion	C. I. %		Modification					Rank	Result Type
							Seq.	Seq.						Score
		883.442	883.447		0.0054	6	47	54	AFFAGSQR														Mascot
		1205.58	1205.63		0.0444	37	4	13	DAVHGVWEHR														Mascot
		1205.58	1205.63		0.0444	37	4	13	DAVHGVWEHR														Mascot
		1317.73	1317.74		0.0094	7	35	46	SGGVERPFVLTR														Mascot
		1317.73	1317.74		0.0094	7	35	46	SGGVERPFVLTR				8		0								Mascot
		1448.75	1448.76		0.0038	3	14	25	DVHNLYGLYVQK														Mascot
		1642.86	1642.87		0.0089	5	129	142	EPWLFGPENTALIR														Mascot
		1798.96	1798.97		0.0124	7	128	142	REPWLFGPENTALIR														Mascot
		1798.96	1798.97		0.0124	7	128	142	REPWLFGPENTALIR				43		98.55								Mascot
	7	calcium-binding protein 39-like [Danio rerio]						gi|55925566		38782.2	6.81		10		51		62.986
		Peptide Information
		Calc. Mass		Obsrv. Mass	± da	± ppm	Start	End	Sequence					Ion	C. I. %		Modification					Rank	Result Type
							Seq.	Seq.						Score
		882.516	882.572		0.0562	64	186	192	DLLTRHK														Mascot
		1041.63	1041.59		-0.039	-37	228	236	LLGELLLDR														Mascot
		1115.67	1115.52		-0.1475	-132	10	19	SPTEIVKTLK														Mascot
		1165.61	1165.75		0.1449	124	254	262	LMMNLLRDK								Oxidation (M)[2,3]						Mascot
		1252.65	1252.73		0.0883	70	145	154	ECIRHEPLAK								Carbamidomethyl (C)[2]						Mascot
		1359.74	1359.66		-0.0776	-57	213	223	LLHSENYVTKR														Mascot
		1451.72	1451.76		0.0356	25	35	47	ASEEVSKCLVAMK								Carbamidomethyl (C)[8]						Mascot
		1563.8	1563.75		-0.0459	-29	263	275	SPNIQFEAFHVFK														Mascot
		1563.8	1563.75		-0.0459	-29	263	275	SPNIQFEAFHVFK														Mascot
		2028.11	2028.07		-0.0341	-17	228	244	LLGELLLDRHNFTVMTR														Mascot
		2044.1	2044.09		-0.0133	-7	228	244	LLGELLLDRHNFTVMTR								Oxidation (M)[15]						Mascot
		2396.15	2396.27		0.1135	47	129	148	GYETPQVALNCGIMLRE								Carbamidomethyl (C)[11,18], Oxidation						Mascot
									CIR								(M)[14]
	8	Synbl protein [Danio rerio]						gi|141796272		31226.2	5.37		9		44		0
		Peptide Information
		Calc. Mass		Obsrv. Mass	± da	± ppm	Start	End	Sequence					Ion	C. I. %		Modification					Rank	Result Type
							Seq.	Seq.						Score
		842.571	842.516		-0.055	-65	18	24	VEKLLLK														Mascot
		883.39	883.447		0.057	65	25	31	YNTENSR														Mascot
		1045.68	1045.57		-0.1043	-100	171	179	LLFLLSALR														Mascot
		1058.65	1058.56		-0.0934	-88	256	264	LRLIAGIMR								Oxidation (M)[8]						Mascot
		1115.66	1115.52		-0.141	-126	46	55	LCQGLLTVLR														Mascot
		1563.74	1563.75		0.0111	7	2	16	SLSDILSEIDGGDDK														Mascot
		1563.74	1563.75		0.0111	7	2	16	SLSDILSEIDGGDDK														Mascot
		1625.82	1625.8		-0.0133	-8	32	45	TFAFDLEEEGARIK														Mascot
		1691.83	1691.83		0	0	2	17	SLSDILSEIDGGDDKK														Mascot
		2283.02	2283.2		0.1821	80	98	118	ICVAGHEGEPLEEAQSAE														Mascot
									EER
	9	novel protein similar to human and mouse GRIP and						gi|56207500		91060.6	5.23		14		42		0
		coiled-coil domain containing 1 (GCC1) [Danio rer
		Peptide Information
		Calc. Mass		Obsrv. Mass	± da	± ppm	Start	End	Sequence					Ion	C. I. %		Modification					Rank	Result Type
							Seq.	Seq.						Score
		842.452	842.516		0.0641	76	31	36	YQTRFK														Mascot
		902.524	902.521		-0.0034	-4	518	525	MRAQGVLK														Mascot
		1022.52	1022.5		-0.0143	-14	744	752	DGANLEYLK														Mascot
		1058.51	1058.56		0.0457	43	83	92	ALPSDLGDDR														Mascot
		1115.57	1115.52		-0.0496	-44	215	223	QELEELQAR														Mascot
		1309.67	1309.62		-0.0528	-40	705	715	LEEDLHQLQGK														Mascot
		1359.65	1359.66		0.0104	8	531	542	DGNQAKELEEAR														Mascot
		1434.71	1434.73		0.0188	13	390	402	VSELSELLGACEK								Carbamidomethyl (C)[11]						Mascot
		1434.71	1434.73		0.0188	13	390	402	VSELSELLGACEK				4		0		Carbamidomethyl (C)[11]						Mascot
		1477.73	1477.71		-0.0245	-17	378	389	MEEIRVASLEER								Oxidation (M)[1]						Mascot
		1661.85	1661.78		-0.0712	-43	390	404	VSELSELLGACEKAR								Carbamidomethyl (C)[11]						Mascot
		1677.88	1677.7		-0.1815	-108	552	565	YINLRIQSDEAEVK														Mascot
		1677.88	1677.7		-0.1815	-108	552	565	YINLRIQSDEAEVK														Mascot
		1785.85	1785.96		0.1078	60	481	496	LLEGGEKDHEVSESEK														Mascot
		2027.98	2028.07		0.0937	46	230	246	QHQAELQNLQEQFAESK														Mascot
		2297.11	2297.15		0.0454	20	293	313	ATLAEAMQAADRGLDYE								Oxidation (M)[7]						Mascot
									SQLK
	10	novel protein [Danio rerio]						gi|157888764		66709.9	9.51		10		41		0	7	0
		Peptide Information
		Calc. Mass		Obsrv. Mass	± da	± ppm	Start	End	Sequence					Ion	C. I. %		Modification					Rank	Result Type
							Seq.	Seq.						Score
		883.368	883.447		0.0795	90	121	127	FEDESEK														Mascot
		1055.63	1055.61		-0.026	-25	533	541	EGRPKLSLR				3		0								Mascot
		1055.63	1055.61		-0.026	-25	533	541	EGRPKLSLR														Mascot
		1146.6	1146.64		0.0407	35	371	381	SGSKSRPSGQR														Mascot
		1317.65	1317.74		0.0886	67	237	246	WVTPNQTCRR								Carbamidomethyl (C)[8]						Mascot
		1317.65	1317.74		0.0886	67	237	246	WVTPNQTCRR								Carbamidomethyl (C)[8]						Mascot
		1448.63	1448.76		0.1313	91	561	573	SNSMEHLCSPTAR								Oxidation (M)[4]						Mascot
		1477.69	1477.71		0.0143	10	542	554	RFFSAMGLNSMGK								Oxidation (M)[6,11]						Mascot
		1625.82	1625.8		-0.0206	-13	222	236	STHGITDSQEKAVPR														Mascot
		1661.84	1661.78		-0.0574	-35	543	557	FFSAMGLNSMGKLVK								Oxidation (M)[5,10]						Mascot
		1798.93	1798.97		0.0429	24	477	493	DSKSTVPVSSDSHLALR														Mascot
		1798.93	1798.97		0.0429	24	477	493	DSKSTVPVSSDSHLALR				7		0								Mascot
		2225.04	2225.14		0.1018	46	197	216	DEMLRTCEACGSILAAAQ								Carbamidomethyl (C)[7,10]						Mascot
									TK
Gel Idx/Pos			176/H3						Instr./Gel Origin			BA2060/110707A							Process Status		Analysis Succeeded
Plate [#] Name			[1] 31496						Instrument Sample Name										Spectra		11
Rank		Protein Name						Accession No.		Protein MW	Protein		Pep.		Protein		Protein	Total Ion	Total Ion
											PI		Count		Score		Score	Score	C. I. %
																	C. I. %
	1	liver glycogen phosphorylase [Danio rerio]						gi|56606106		111467	5.5		33		1050		100	796	100
		Peptide Information
		Calc. Mass		Obsrv. Mass	± da	± ppm	Start	End	Sequence					Ion	C. I. %		Modification					Rank	Result Type
							Seq.	Seq.						Score
		842.521	842.512		-0.0083	-10	853	859	RAINQIK														Mascot
		862.478	862.482		0.0037	4	947	954	IPPPGEPR														Mascot
		893.415	893.416		0.0009	1	500	506	YGNPWEK														Mascot
		914.546	914.547		0.0014	2	713	719	HLQIIYK														Mascot
		916.485	916.487		0.0022	2	586	593	NLAENISR														Mascot
		946.474	946.476		0.0018	2	564	571	APNDFNLR														Mascot
		946.474	946.476		0.0018	2	250	257	APNDFNLR				55		99.905								Mascot
		994.583	994.583		-0.0003	0	35	42	HLHFTLVK														Mascot
		1053.57	1053.58		0.0032	3	755	762	VIFLENYR														Mascot
		1053.57	1053.58		0.0032	3	755	762	VIFLENYR				47		99.413								Mascot
		1161.56	1161.56		0.0056	5	476	484	YEYGIFNQK														Mascot
		1176.57	1176.6		0.0352	30	428	438	MSPIEEGGGKR								Oxidation (M)[1]						Mascot
		1220.58	1220.59		0.003	2	886	895	VFADYESYVK														Mascot
		1355.79	1355.68		-0.1083	-80	18	30	GIVGVENVAELKK														Mascot
		1355.79	1355.79		0.0004	0	18	30	GIVGVENVAELKK														Mascot
		1363.65	1363.66		0.0056	4	673	683	LDWDTAWDITK														Mascot
		1371.67	1371.67		0.0055	4	51	61	DYYFALSHTVR														Mascot
		1371.67	1371.67		0.0055	4	51	61	DYYFALSHTVR				91		100								Mascot
		1386.6	1386.61		0.0056	4	71	81	TQQFCYEADPK								Carbamidomethyl (C)[5]						Mascot
		1442.7	1442.7		0.0031	2	594	605	VLYPNDNFFEGK														Mascot
		1511.7	1511.7		0.0032	2	633	646	NTSGPLSFDSFPDK														Mascot
		1519.75	1519.76		0.0048	3	673	684	LDWDTAWDITKR														Mascot
		1542.7	1542.7		0.0037	2	71	82	TQQFCYEADPKR								Carbamidomethyl (C)[5]						Mascot
		1556.75	1556.75		0.0008	1	83	94	VYYLSLEFYMGR								Oxidation (M)[10]						Mascot
		1618.71	1618.72		0.0037	2	487	499	DGWQVEEADDWLR														Mascot
		1624.8	1624.8		0.0049	3	258	271	DFNVGDYIQAVLDR				118		100								Mascot
		1624.8	1624.8		0.0049	3	572	585	DFNVGDYIQAVLDR														Mascot
		1719.88	1719.88		0.0052	3	507	520	ARPEFMLPVHFYGR														Mascot
		1735.87	1735.88		0.0078	4	507	520	ARPEFMLPVHFYGR								Oxidation (M)[6]						Mascot
		1735.87	1735.88		0.0078	4	193	206	ARPEFMLPVHFYGR				13		0		Oxidation (M)[6]						Mascot
		1751.93	1751.9		-0.03	-17	611	625	QEYFVVAATLQDVIR														Mascot
		1781.98	1781.98		0.0025	1	735	751	LITSVADVVNNDPVIGR				136		100								Mascot
		1781.98	1781.98		0.0025	1	735	751	LITSVADVVNNDPVIGR														Mascot
		1859.89	1859.9		0.0042	2	485	499	IKDGWQVEEADDWLR				81		100								Mascot
		1859.89	1859.9		0.0042	2	485	499	IKDGWQVEEADDWLR														Mascot
		1861.94	1861.93		-0.0123	-7	685	700	TFAYTNHTVLPEALER														Mascot
		1971	1971		0.0036	2	838	853	GYNALQYYENLPELKR				114		100								Mascot
		1971	1971		0.0036	2	838	853	GYNALQYYENLPELKR														Mascot
		1993.11	1993.11		0.0017	1	609	625	LKQEYFVVAATLQDVIR														Mascot
		1993.11	1993.11		0.0017	1	295	311	LKQEYFVVAATLQDVIR				150		100								Mascot
		2066.03	2066.04		0.0044	2	929	946	TITEYATEIWGVEPTDLK														Mascot
		2120.1	2120.11		0.0103	5	647	665	VAIQLNDTHPAMAIPELM														Mascot
									R
		2136.09	2136.1		0.0029	1	647	665	VAIQLNDTHPAMAIPELM								Oxidation (M)[12]						Mascot
									R
		2152.09	2152.09		0.0041	2	647	665	VAIQLNDTHPAMAIPELM								Oxidation (M)[12,18]						Mascot
									R
		2248.15	2248.14		-0.012	-5	406	424	INLIHLNHIASLFPEDMDR														Mascot
		2264.15	2264.15		-0.0008	0	406	424	INLIHLNHIASLFPEDMDR								Oxidation (M)[17]						Mascot
		2283.27	2283.18		-0.0937	-41	731	751	MIIKLITSVADVVNNDPVI								Oxidation (M)[1]						Mascot
									GR
	2	glycogen phosphorylase, muscle form [Danio rerio]						gi|66472494		96870.5	6.67		18		105		100	47	99.413
		Peptide Information
		Calc. Mass		Obsrv. Mass	± da	± ppm	Start	End	Sequence					Ion	C. I. %		Modification					Rank	Result Type
							Seq.	Seq.						Score
		842.462	842.512		0.0506	60	835	842	LAAPDDIK														Mascot
		845.463	845.467		0.0039	5	571	576	IHEYKR														Mascot
		862.424	862.482		0.0578	67	365	371	AWDICVR														Mascot
		893.415	893.416		0.0009	1	186	192	YGNPWEK														Mascot
		914.517	914.547		0.0306	33	484	491	TNGITPRR														Mascot
		916.485	916.487		0.0022	2	271	278	NLAENISR														Mascot
		994.583	994.583		-0.0003	0	35	42	HLHFTLVK														Mascot
		1053.57	1053.58		0.0032	3	643	650	VIFLENYR														Mascot
		1053.57	1053.58		0.0032	3	643	650	VIFLENYR				47		99.413								Mascot
		1197.49	1197.59		0.1001	84	471	479	DFYEMDPHK								Oxidation (M)[5]						Mascot
		1355.67	1355.68		0.0067	5	51	61	DYYFALAHTVR														Mascot
		1355.67	1355.79		0.1154	85	51	61	DYYFALAHTVR														Mascot
		1371.8	1371.67		-0.1247	-91	459	470	IHSDILKATVFK														Mascot
		1371.8	1371.67		-0.1247	-91	459	470	IHSDILKATVFK														Mascot
		1386.65	1386.61		-0.0485	-35	71	81	TQQSYYEKDPK														Mascot
		1442.7	1442.7		0.0031	2	279	290	VLYPNDNFFEGK														Mascot
		1511.78	1511.7		-0.0709	-47	50	61	RDYYFALAHTVR														Mascot
		1556.75	1556.75		0.0008	1	83	94	VYYISLEFYMGR								Oxidation (M)[10]						Mascot
		1961.05	1960.98		-0.0744	-38	576	590	RQLLNCLHIITFYNR								Carbamidomethyl (C)[6]						Mascot
		2007.13	2007.08		-0.0445	-22	294	310	LKQEYFVVAATLQDIIR														Mascot
		2120.1	2120.11		0.0071	3	817	834	TISQYAREIWGVEPTLEK														Mascot
	3	brain glycogen phosphorylase Pygb [Danio rerio]						gi|46403219		97393.7	6.11		14		103		100	60	99.969
		Peptide Information
		Calc. Mass		Obsrv. Mass	± da	± ppm	Start	End	Sequence					Ion	C. I. %		Modification					Rank	Result Type
							Seq.	Seq.						Score
		845.463	845.467		0.0039	5	571	576	IHEYKR														Mascot
		893.415	893.416		0.0009	1	186	192	YGNPWEK														Mascot
		914.517	914.547		0.0306	33	484	491	TNGITPRR														Mascot
		916.485	916.487		0.0022	2	271	278	NLAENISR														Mascot
		994.583	994.583		-0.0003	0	35	42	HLHFTLVK														Mascot
		1053.57	1053.58		0.0032	3	643	650	VIFLENYR														Mascot
		1053.57	1053.58		0.0032	3	643	650	VIFLENYR				47		99.413								Mascot
		1220.68	1220.59		-0.0956	-78	599	609	FVPRTVMIGGK								Oxidation (M)[7]						Mascot
		1355.67	1355.68		0.0067	5	51	61	DYYFALAHTVR														Mascot
		1355.67	1355.79		0.1154	85	51	61	DYYFALAHTVR														Mascot
		1442.7	1442.7		0.0031	2	279	290	VLYPNDNFFEGK														Mascot
		1735.87	1735.88		0.0078	4	193	206	ARPEYMLPVHFYGR														Mascot
		1735.87	1735.88		0.0078	4	193	206	ARPEYMLPVHFYGR				13		0								Mascot
		1751.87	1751.9		0.0341	19	193	206	ARPEYMLPVHFYGR								Oxidation (M)[6]						Mascot
		1838.88	1838.89		0.0088	5	171	185	IAHGWQIEEADDWLR														Mascot
		1970.9	1971		0.1052	53	772	787	FKVFADYESYISCQDR														Mascot
		1970.9	1971		0.1052	53	772	787	FKVFADYESYISCQDR														Mascot
		2007.13	2007.08		-0.0445	-22	294	310	LKQEYFVVAATLQDIIR														Mascot
		2120.1	2120.11		0.013	6	439	458	RINMAHLCVVGSHAVNG								Oxidation (M)[4]						Mascot
									VAR
	4	glycogen phosphorylase, brain form [Danio rerio]						gi|136256027		97365.7	6.11		13		97		100	60	99.969
		Peptide Information
		Calc. Mass		Obsrv. Mass	± da	± ppm	Start	End	Sequence					Ion	C. I. %		Modification					Rank	Result Type
							Seq.	Seq.						Score
		845.463	845.467		0.0039	5	571	576	IHEYKR														Mascot
		893.415	893.416		0.0009	1	186	192	YGNPWEK														Mascot
		914.517	914.547		0.0306	33	484	491	TNGITPRR														Mascot
		916.485	916.487		0.0022	2	271	278	NLAENISR														Mascot
		994.583	994.583		-0.0003	0	35	42	HLHFTLVK														Mascot
		1053.57	1053.58		0.0032	3	643	650	VIFLENYR														Mascot
		1053.57	1053.58		0.0032	3	643	650	VIFLENYR				47		99.413								Mascot
		1220.68	1220.59		-0.0956	-78	599	609	FVPRTVMIGGK								Oxidation (M)[7]						Mascot
		1355.67	1355.68		0.0067	5	51	61	DYYFALAHTVR														Mascot
		1355.67	1355.79		0.1154	85	51	61	DYYFALAHTVR														Mascot
		1442.7	1442.7		0.0031	2	279	290	VLYPNDNFFEGK														Mascot
		1735.87	1735.88		0.0078	4	193	206	ARPEYMLPVHFYGR														Mascot
		1735.87	1735.88		0.0078	4	193	206	ARPEYMLPVHFYGR				13		0								Mascot
		1751.87	1751.9		0.0341	19	193	206	ARPEYMLPVHFYGR								Oxidation (M)[6]						Mascot
		1838.88	1838.89		0.0088	5	171	185	IAHGWQIEEADDWLR														Mascot
		2007.13	2007.08		-0.0445	-22	294	310	LKQEYFVVAATLQDIIR														Mascot
		2120.1	2120.11		0.013	6	439	458	RINMAHLCVVGSHAVNG								Oxidation (M)[4]						Mascot
									VAR
	5	novel protein similar to vertebrate NifU-like N-terminal						gi|37606130		17748.2	8.87		7		52		73.186	14	0
		domain containing (NIFUN) [Danio rerio]
		Peptide Information
		Calc. Mass		Obsrv. Mass	± da	± ppm	Start	End	Sequence					Ion	C. I. %		Modification					Rank	Result Type
							Seq.	Seq.						Score
		862.514	862.482		-0.0327	-38	81	87	IIDARFK														Mascot
		916.546	916.487		-0.0593	-65	116	123	IKNTEIAK														Mascot
		946.525	946.476		-0.0491	-52	1	9	MALAAAARR								Oxidation (M)[1]						Mascot
		946.525	946.476		-0.0491	-52	1	9	MALAAAARR				14		0		Oxidation (M)[1]						Mascot
		1045.56	1045.57		0.0031	3	44	53	NVGSLDKNAK														Mascot
		1161.57	1161.56		-0.0115	-10	155	164	DEKETLAEAR														Mascot
		2100.04	2100		-0.0408	-19	88	108	TFGCGSAIASSSLATEWV														Mascot
									KGK
		2283.15	2283.18		0.0257	11	124	143	ELCLPPVKLHCSMLAEDA								Carbamidomethyl (C)[3], Oxidation (M)[13]						Mascot
									IK
	6	calcium/calmodulin-dependent protein kinase II inhibitor						gi|223029393		8468.1	5.24		6		50		57.502
		2 [Danio rerio]
		Peptide Information
		Calc. Mass		Obsrv. Mass	± da	± ppm	Start	End	Sequence					Ion	C. I. %		Modification					Rank	Result Type
							Seq.	Seq.						Score
		842.521	842.512		-0.0083	-10	48	55	LGQIGRAK														Mascot
		845.436	845.467		0.0304	36	57	63	VVIEDDR														Mascot
		994.451	994.583		0.132	133	70	79	GMTDKSSPGV								Oxidation (M)[2]						Mascot
		1001.54	1001.57		0.0286	29	56	63	RVVIEDDR														Mascot
		1542.84	1542.7		-0.133	-86	57	69	VVIEDDRIDEVLK														Mascot
		3337.41	3337.73		0.3257	98	12	43	MSGYGADTDVSQMSFSC														Mascot
									GLQDTNSFFGASQAK
	7	MCM4 minichromosome maintenance deficient 4,						gi|33989734		83986.4	5.88		12		50		52.316	10	0
		mitotin (S. cerevisiae) [Danio rerio]
		Peptide Information
		Calc. Mass		Obsrv. Mass	± da	± ppm	Start	End	Sequence					Ion	C. I. %		Modification					Rank	Result Type
							Seq.	Seq.						Score
		845.484	845.467		-0.0172	-20	98	105	ADLGSVRK														Mascot
		855.436	855.439		0.0029	3	671	677	DYIAFAR														Mascot
		914.517	914.547		0.0306	33	87	95	SGIRGTPAR														Mascot
		994.579	994.583		0.0037	4	722	730	LAEAHAKVR														Mascot
		1001.55	1001.57		0.0174	17	96	104	QRADLGSVR														Mascot
		1109.59	1109.59		0.0007	1	396	404	THIDAIHFR														Mascot
		1587.86	1587.79		-0.0726	-46	364	377	VQPGDRVNITGIYR														Mascot
		1719.92	1719.88		-0.037	-22	707	721	GMVSAYPRQLESLIR														Mascot
		1735.92	1735.88		-0.0344	-20	707	721	GMVSAYPRQLESLIR								Oxidation (M)[2]						Mascot
		1735.97	1735.88		-0.0886	-51	611	625	TTIENIQLPHTLLSR				4		0								Mascot
		1790.86	1790.91		0.055	31	12	28	DPPTPASEDPLSPPSQR														Mascot
		1992.92	1993.11		0.1915	96	162	178	EEENAGLDLNEPLYMQK														Mascot
		1992.92	1993.11		0.1915	96	162	178	EEENAGLDLNEPLYMQK				10		0								Mascot
		2225.08	2225.12		0.0491	22	60	80	SVLQSEIDASSPLMYGTP														Mascot
									SSR
	8	DNA replication licensing factor MCM4 [Danio rerio]						gi|321267495		94464.9	5.99		13		47		4.859	10	0
		Peptide Information
		Calc. Mass		Obsrv. Mass	± da	± ppm	Start	End	Sequence					Ion	C. I. %		Modification					Rank	Result Type
							Seq.	Seq.						Score
		845.484	845.467		-0.0172	-20	98	105	ADLGSVRK														Mascot
		855.436	855.439		0.0029	3	671	677	DYIAFAR														Mascot
		914.517	914.547		0.0306	33	87	95	SGIRGTPAR														Mascot
		994.579	994.583		0.0037	4	722	730	LAEAHAKVR														Mascot
		1001.55	1001.57		0.0174	17	96	104	QRADLGSVR														Mascot
		1109.59	1109.59		0.0007	1	396	404	THIDAIHFR														Mascot
		1197.59	1197.59		-0.0015	-1	802	810	YQQLFDDLR														Mascot
		1587.86	1587.79		-0.0726	-46	364	377	VQPGDRVNITGIYR														Mascot
		1719.92	1719.88		-0.037	-22	707	721	GMVSAYPRQLESLIR														Mascot
		1735.92	1735.88		-0.0344	-20	707	721	GMVSAYPRQLESLIR								Oxidation (M)[2]						Mascot
		1735.97	1735.88		-0.0886	-51	611	625	TTIENIQLPHTLLSR				4		0								Mascot
		1790.86	1790.91		0.055	31	12	28	DPPTPASEDPLSPPSQR														Mascot
		1992.92	1993.11		0.1915	96	162	178	EEENAGLDLNEPLYMQK														Mascot
		1992.92	1993.11		0.1915	96	162	178	EEENAGLDLNEPLYMQK				10		0								Mascot
		2225.08	2225.12		0.0491	22	60	80	SVLQSEIDASSPLMYGTP														Mascot
									SSR
	9	Si:dkeyp-11g8.5 protein [Danio rerio]						gi|133778765		35914.5	9.16		9		42		0
		Peptide Information
		Calc. Mass		Obsrv. Mass	± da	± ppm	Start	End	Sequence					Ion	C. I. %		Modification					Rank	Result Type
							Seq.	Seq.						Score
		862.481	862.482		0.0004	0	43	50	MVLASVAR								Oxidation (M)[1]						Mascot
		994.52	994.583		0.0626	63	288	296	TDATLAQFK														Mascot
		1371.71	1371.67		-0.0381	-28	276	287	VSRTHFDPTGVR														Mascot
		1371.72	1371.67		-0.048	-35	77	89	VLRGPTQADESAK														Mascot
		1386.79	1386.61		-0.1835	-132	38	50	ELAARMVLASVAR														Mascot
		1442.63	1442.7		0.0644	45	119	131	QLPCQCHGSMPGK								Carbamidomethyl (C)[4]						Mascot
		1735.83	1735.88		0.047	27	204	219	TLQKVEEADTSDQSGK														Mascot
		1735.83	1735.88		0.047	27	204	219	TLQKVEEADTSDQSGK														Mascot
		1781.93	1781.98		0.0527	30	104	118	VFLKPGSMVEENLYR														Mascot
		1781.93	1781.98		0.0527	30	104	118	VFLKPGSMVEENLYR														Mascot
		3337.59	3337.73		0.1426	43	93	118	QLLHCQWCEERVFLKPG								Carbamidomethyl (C)[5,8], Oxidation (M)[19]						Mascot
									SMVEENLYR
	10	novel protein similar to vertebrate polymerase (DNA						gi|169153899		97852.6	6.97		16		41		0
		directed) kappa (POLK) [Danio rerio]
		Peptide Information
		Calc. Mass		Obsrv. Mass	± da	± ppm	Start	End	Sequence					Ion	C. I. %		Modification					Rank	Result Type
							Seq.	Seq.						Score
		845.473	845.467		-0.006	-7	89	95	LTVDLER														Mascot
		864.388	864.489		0.1012	117	26	33	AGMEGLDR								Oxidation (M)[3]						Mascot
		893.476	893.416		-0.06	-67	74	80	ITKEQMK								Oxidation (M)[6]						Mascot
		916.448	916.487		0.0386	42	81	88	QAQAEVDR														Mascot
		1371.64	1371.67		0.0314	23	804	814	NMRENQSVEHK														Mascot
		1371.64	1371.67		0.0314	23	804	814	NMRENQSVEHK														Mascot
		1519.71	1519.76		0.0466	31	656	669	QEELSGEPSSLESK														Mascot
		1571.93	1571.79		-0.1363	-87	830	842	LILLQIHTDHIQK														Mascot
		1781.85	1781.98		0.1295	73	234	249	AEVFGTSAEEAVREMR														Mascot
		1781.85	1781.98		0.1295	73	234	249	AEVFGTSAEEAVREMR														Mascot
		1790.76	1790.91		0.1496	84	639	655	GSAMDSNEHTDLSAAER														Mascot
		1838.76	1838.89		0.1338	73	372	387	TFGEMSDAGEQYSLCK								Carbamidomethyl (C)[15], Oxidation (M)[5]						Mascot
		1859.9	1859.9		0.0008	0	623	638	DVNLTAFNQHIDECLK														Mascot
		1859.9	1859.9		0.0008	0	623	638	DVNLTAFNQHIDECLK														Mascot
		1960.77	1960.98		0.2082	106	682	700	ASTSTSEPMADGDDGND								Oxidation (M)[9]						Mascot
									FK
		2211.06	2211.11		0.0466	21	604	622	ISTQVLQCLTCPVCNKEM								Carbamidomethyl (C)[8], Oxidation (M)[18]						Mascot
									K
		2225.1	2225.12		0.0271	12	256	277	TSLTASAGIAPNMMLAKV								Oxidation (M)[13]						Mascot
									CSDK
		2248.07	2248.14		0.0686	31	620	638	EMKDVNLTAFNQHIDECL														Mascot
									K
		2264.07	2264.15		0.0798	35	620	638	EMKDVNLTAFNQHIDECL								Oxidation (M)[2]						Mascot
			2264.15																				Mascot
									K
		2283.03	2283.18		0.1455	64	847	867	DMIIHEDFAGFTSGNNVN								Oxidation (M)[2]						Mascot
									ASK
Gel Idx/Pos			177/H4						Instr./Gel Origin			BA2060/110707A							Process Status		Analysis Succeeded
Plate [#] Name			[1] 31496						Instrument Sample Name										Spectra		11
Rank		Protein Name						Accession No.		Protein MW	Protein		Pep.		Protein		Protein	Total Ion	Total Ion
											PI		Count		Score		Score	Score	C. I. %
																	C. I. %
	1	Methylenetetrahydrofolate dehydrogenase (NADP+						gi|49902652		100428	7.28		13		403		100	364	100
		dependent) [Danio rerio]
		Peptide Information
		Calc. Mass		Obsrv. Mass	± da	± ppm	Start	End	Sequence					Ion	C. I. %		Modification					Rank	Result Type
							Seq.	Seq.						Score
		950.488	950.485		-0.0023	-2	402	409	LNAFACVR								Carbamidomethyl (C)[6]						Mascot
		982.568	982.567		-0.0009	-1	478	486	LVPLAEGQR														Mascot
		1088.62	1088.62		-0.0061	-6	487	495	KFSPVQINR														Mascot
		1155.69	1155.69		0	0	878	888	GVPTGFVLPIR														Mascot
		1155.69	1155.69		0	0	878	888	GVPTGFVLPIR				37		95.174								Mascot
		1458.72	1458.72		-0.0019	-1	520	531	LDIDPESVTWQR														Mascot
		1458.72	1458.72		-0.0019	-1	520	531	LDIDPESVTWQR				89		100								Mascot
		1592.82	1592.81		-0.0025	-2	336	349	EIGLLSDEVELYGR				136		100								Mascot
		1592.82	1592.81		-0.0025	-2	336	349	EIGLLSDEVELYGR														Mascot
		2125.99	2125.99		-0.0015	-1	721	738	EYIEENLTLLEAGCANMR								Carbamidomethyl (C)[14]						Mascot
		2141.98	2141.99		0.0044	2	721	738	EYIEENLTLLEAGCANMR								Carbamidomethyl (C)[14], Oxidation (M)[17]						Mascot
		2204.11	2204.1		-0.0025	-1	595	615	SGQPVTTEDLGVCGALT								Carbamidomethyl (C)[13]						Mascot
									VLMR
		2218.11	2218.13		0.0161	7	228	249	TGAVVIDCGINTIADSSRP								Carbamidomethyl (C)[8]						Mascot
									SGK
		2220.1	2220.12		0.0205	9	595	615	SGQPVTTEDLGVCGALT								Carbamidomethyl (C)[13], Oxidation (M)[20]						Mascot
									VLMR
		2238.11	2238.11		-0.0025	-1	657	678	LVGPQGFVVTEAGFGADI								Oxidation (M)[20]						Mascot
									GMEK
		2269.27	2269.26		-0.0037	-2	93	112	IHGLIVQLPLDSIHTINTER														Mascot
		2269.27	2269.26		-0.0037	-2	93	112	IHGLIVQLPLDSIHTINTER				101		100								Mascot
		2297.01	2297.19		0.187	81	137	156	GDLGDCFIPCTPNGCME								Carbamidomethyl (C)[6,10,15]						Mascot
									LIK
		2500.13	2500.13		-0.001	0	775	799	EAGAFDAVPCSHWADG								Carbamidomethyl (C)[10]						Mascot
									GAGAVDLAR
	2	C-1-tetrahydrofolate synthase, cytoplasmic [Danio rerio]						gi|41054762		100398	7.06		11		302		100	275	100
		Peptide Information
		Calc. Mass		Obsrv. Mass	± da	± ppm	Start	End	Sequence					Ion	C. I. %		Modification					Rank	Result Type
		Calc. Mass		Obsrv. Mass	± da	± ppm	Seq.	Seq.	Sequence					Score	C. I. %		Modification					Rank	Result Type
		950.488	950.485		-0.0023	-2	402	409	LNAFACVR								Carbamidomethyl (C)[6]						Mascot
		982.568	982.567		-0.0009	-1	478	486	LVPLAEGQR														Mascot
		1088.62	1088.62		-0.0061	-6	487	495	KFSPVQINR														Mascot
		1155.69	1155.69		0	0	878	888	GVPTGFVLPIR														Mascot
		1155.69	1155.69		0	0	878	888	GVPTGFVLPIR				37		95.174								Mascot
		1592.82	1592.81		-0.0025	-2	336	349	EIGLLSDEVELYGR				136		100								Mascot
		1592.82	1592.81		-0.0025	-2	336	349	EIGLLSDEVELYGR														Mascot
		2125.99	2125.99		-0.0015	-1	721	738	EYIEENLTLLEAGCANMR								Carbamidomethyl (C)[14]						Mascot
		2141.98	2141.99		0.0044	2	721	738	EYIEENLTLLEAGCANMR								Carbamidomethyl (C)[14], Oxidation (M)[17]						Mascot
		2204.11	2204.1		-0.0025	-1	595	615	SGQPVTTEDLGVCGALT								Carbamidomethyl (C)[13]						Mascot
									VLMR
		2220.1	2220.12		0.0205	9	595	615	SGQPVTTEDLGVCGALT								Carbamidomethyl (C)[13], Oxidation (M)[20]						Mascot
									VLMR
		2238.11	2238.11		-0.0025	-1	657	678	LVGPQGFVVTEAGFGADI								Oxidation (M)[20]						Mascot
									GMEK
		2269.27	2269.26		-0.0037	-2	93	112	IHGLIVQLPLDSIHTINTER														Mascot
		2269.27	2269.26		-0.0037	-2	93	112	IHGLIVQLPLDSIHTINTER				101		100								Mascot
		2297.01	2297.19		0.187	81	137	156	GDLGDCFIPCTPNGCME								Carbamidomethyl (C)[6,10,15]						Mascot
									LIK
		2500.13	2500.13		-0.001	0	775	799	EAGAFDAVPCSHWADG								Carbamidomethyl (C)[10]						Mascot
									GAGAVDLAR
	3	vitellogenin 1 [Danio rerio]						gi|94733730		149140	8.74		18		300		100	252	100
		Peptide Information
		Calc. Mass		Obsrv. Mass	± da	± ppm	Start	End	Sequence					Ion	C. I. %		Modification					Rank	Result Type
							Seq.	Seq.						Score
		888.53	888.526		-0.0045	-5	425	432	FATIPALR														Mascot
		1023.51	1023.51		-0.0039	-4	195	203	DVGLAYTER														Mascot
		1088.54	1088.62		0.0745	68	415	424	MTASLATHEK														Mascot
		1097.67	1097.66		-0.0031	-3	514	523	VQVDAILALR														Mascot
		1115.69	1115.69		-0.001	-1	333	341	FVQLVQLLR														Mascot
		1115.69	1115.69		-0.001	-1	333	341	FVQLVQLLR				52		99.845								Mascot
		1121.6	1121.59		-0.0059	-5	348	356	IEAIWSQFK														Mascot
		1382.79	1382.68		-0.1062	-77	303	315	ISDAPAQIVEVLK														Mascot
		1432.67	1432.65		-0.0168	-12	184	194	DLSHCQERIMK								Carbamidomethyl (C)[5], Oxidation (M)[10]						Mascot
		1463.89	1463.89		-0.0015	-1	532	544	LVQPVALQLVLDR														Mascot
		1515.75	1515.75		-0.0027	-2	733	745	VFGQEVAYVNFDK														Mascot
		1622.85	1622.85		-0.0031	-2	668	683	AYLAGAAADVIEFGVR														Mascot
		1622.85	1622.85		-0.0031	-2	668	683	AYLAGAAADVIEFGVR				121		100								Mascot
		1666.88	1666.88		0.0004	0	483	498	VMGNAGHPSSLKPIMK														Mascot
		1695.9	1695.89		-0.0068	-4	119	134	VFAPAGVSPTVMNLHR														Mascot
		1699.94	1699.93		-0.0045	-3	34	49	YEALLLGGLPQEGLAR														Mascot
		1699.94	1699.93		-0.0045	-3	34	49	YEALLLGGLPQEGLAR				80		100								Mascot
		1711.89	1711.89		-0.0039	-2	119	134	VFAPAGVSPTVMNLHR								Oxidation (M)[12]						Mascot
		1954.87	1954.87		-0.0008	0	147	163	TQNIYEMQEAGAQGVCR								Carbamidomethyl (C)[16]						Mascot
		2269.2	2269.26		0.0652	29	1179	1198	ADQKLLGYQLAAYFDKPT														Mascot
									AR
		2269.2	2269.26		0.0652	29	1179	1198	ADQKLLGYQLAAYFDKPT														Mascot
									AR
		2299.23	2299.18		-0.0461	-20	1039	1058	QINIIDDDTPEGQAFLLKL														Mascot
									R
		2627.37	2627.37		-0.0042	-2	897	920	VEALPVELPEHIASASFET														Mascot
									YAVVR
	4	novel protein similar to vitellogenin 1 (vg1) [Danio rerio]						gi|94733731		149169	8.84		13		275		100	252	100
		Peptide Information
		Calc. Mass		Obsrv. Mass	± da	± ppm	Start	End	Sequence					Ion	C. I. %		Modification					Rank	Result Type
							Seq.	Seq.						Score
		1023.51	1023.51		-0.0039	-4	199	207	DVGLAYTER														Mascot
		1097.67	1097.66		-0.0031	-3	518	527	VQVDAILALR														Mascot
		1115.69	1115.69		-0.001	-1	337	345	FVQLVQLLR														Mascot
		1115.69	1115.69		-0.001	-1	337	345	FVQLVQLLR				52		99.845								Mascot
		1121.6	1121.59		-0.0059	-5	352	360	IEAIWSQFK														Mascot
		1432.67	1432.65		-0.0168	-12	188	198	DLSHCQERIMK								Carbamidomethyl (C)[5], Oxidation (M)[10]						Mascot
		1463.89	1463.89		-0.0015	-1	536	548	LVQPVALQLVLDR														Mascot
		1515.75	1515.75		-0.0027	-2	737	749	VFGQEVAYVNFDK														Mascot
		1622.85	1622.85		-0.0031	-2	672	687	AYLAGAAADVIEFGVR														Mascot
		1622.85	1622.85		-0.0031	-2	672	687	AYLAGAAADVIEFGVR				121		100								Mascot
		1666.88	1666.88		0.0004	0	487	502	VMGNAGHPSSLKPIMK														Mascot
		1699.94	1699.93		-0.0045	-3	38	53	YEALLLGGLPQEGLAR														Mascot
		1699.94	1699.93		-0.0045	-3	38	53	YEALLLGGLPQEGLAR				80		100								Mascot
		1954.87	1954.87		-0.0008	0	151	167	TQNIYEMQEAGAQGVCR								Carbamidomethyl (C)[16]						Mascot
		2269.2	2269.26		0.0652	29	1181	1200	ADQKLLGYQLAAYFDKPT														Mascot
									AR
		2269.2	2269.26		0.0652	29	1181	1200	ADQKLLGYQLAAYFDKPT														Mascot
									AR
		2299.23	2299.18		-0.0461	-20	1043	1062	QINIIDDDTPEGQAFLLKL														Mascot
									R
	5	Vtg1 protein [Danio rerio]						gi|145337918		116566	9.07		14		211		100	174	100
		Peptide Information
		Calc. Mass		Obsrv. Mass	± da	± ppm	Start	End	Sequence					Ion	C. I. %		Modification					Rank	Result Type
		Calc. Mass		Obsrv. Mass	± da	± ppm	Seq.	Seq.	Sequence					Score	C. I. %		Modification					Rank	Result Type
		888.53	888.526		-0.0045	-5	131	138	FATIPALR														Mascot
		1088.54	1088.62		0.0745	68	121	130	MTASLATHEK														Mascot
		1097.67	1097.66		-0.0031	-3	220	229	VQVDAILALR														Mascot
		1115.69	1115.69		-0.001	-1	39	47	FVQLVQLLR														Mascot
		1115.69	1115.69		-0.001	-1	39	47	FVQLVQLLR				52		99.845								Mascot
		1121.6	1121.59		-0.0059	-5	54	62	IEAIWSQFK														Mascot
		1382.79	1382.68		-0.1062	-77	9	21	ISDAPAQIVEVLK														Mascot
		1463.89	1463.89		-0.0015	-1	238	250	LVQPVALQLVLDR														Mascot
		1515.75	1515.75		-0.0027	-2	439	451	VFGQEVAYVNFDK														Mascot
		1622.85	1622.85		-0.0031	-2	374	389	AYLAGAAADVIEFGVR														Mascot
		1622.85	1622.85		-0.0031	-2	374	389	AYLAGAAADVIEFGVR				121		100								Mascot
		1666.88	1666.88		0.0004	0	189	204	VMGNAGHPSSLKPIMK														Mascot
		1699.9	1699.93		0.0285	17	303	320	ITAPDMASVAGAANVAIK														Mascot
		1699.9	1699.93		0.0285	17	303	320	ITAPDMASVAGAANVAIK														Mascot
		2269.2	2269.26		0.0652	29	885	904	ADQKLLGYQLAAYFDKPT														Mascot
									AR
		2269.2	2269.26		0.0652	29	885	904	ADQKLLGYQLAAYFDKPT														Mascot
									AR
		2299.23	2299.18		-0.0461	-20	745	764	QINIIDDDTPEGQAFLLKL														Mascot
									R
		2627.37	2627.37		-0.0042	-2	603	626	VEALPVELPEHIASASFET														Mascot
									YAVVR
	6	vitellogenin 1 [Danio rerio]						gi|21391472		127954	8.69		14		207		100	174	100
		Peptide Information
		Calc. Mass		Obsrv. Mass	± da	± ppm	Start	End	Sequence					Ion	C. I. %		Modification					Rank	Result Type
							Seq.	Seq.						Score
		888.53	888.526		-0.0045	-5	234	241	FATIPALR														Mascot
		1023.51	1023.51		-0.0039	-4	4	12	DVGLAYTER														Mascot
		1088.54	1088.62		0.0745	68	224	233	MTASLATHEK														Mascot
		1097.67	1097.66		-0.0031	-3	323	332	VQVDAILALR														Mascot
		1115.69	1115.69		-0.001	-1	142	150	FVQLVQLLR														Mascot
		1115.69	1115.69		-0.001	-1	142	150	FVQLVQLLR				52		99.845								Mascot
		1121.6	1121.59		-0.0059	-5	157	165	IEAIWSQFK														Mascot
		1382.79	1382.68		-0.1062	-77	112	124	ISDAPAQIVEVLK														Mascot
		1463.89	1463.89		-0.0015	-1	341	353	LVQPVALQLVLDR														Mascot
		1515.75	1515.75		-0.0027	-2	542	554	VFGQEVAYVNFDK														Mascot
		1622.85	1622.85		-0.0031	-2	477	492	AYLAGAAADVIEFGVR														Mascot
		1622.85	1622.85		-0.0031	-2	477	492	AYLAGAAADVIEFGVR				121		100								Mascot
		1666.88	1666.88		0.0004	0	292	307	VMGNAGHPSSLKPIMK														Mascot
		1699.9	1699.93		0.0285	17	406	423	ITAPDMASVAGAANVAIK														Mascot
		1699.9	1699.93		0.0285	17	406	423	ITAPDMASVAGAANVAIK														Mascot
		2269.2	2269.26		0.0652	29	986	1005	ADQKLLGYQLAAYFDKPT														Mascot
									AR
		2269.2	2269.26		0.0652	29	986	1005	ADQKLLGYQLAAYFDKPT														Mascot
									AR
		2299.23	2299.18		-0.0461	-20	848	867	QINIIDDDTPEGQAFLLKL														Mascot
									R
	7	hypothetical protein LOC678536 [Danio rerio]						gi|160420306		148750	8.89		19		184		100	130	100
		Peptide Information
		Calc. Mass		Obsrv. Mass	± da	± ppm	Start	End	Sequence					Ion	C. I. %		Modification					Rank	Result Type
							Seq.	Seq.						Score
		864.446	864.509		0.0624	72	87	94	DSFVPATK														Mascot
		1023.51	1023.51		-0.0039	-4	195	203	DVGLAYTER														Mascot
		1045.55	1045.56		0.0166	16	1346	1353	DFLSWIHK														Mascot
		1097.67	1097.66		-0.0031	-3	514	523	VQVDAILALR														Mascot
		1115.69	1115.69		-0.001	-1	333	341	FVQLVQLLR														Mascot
		1115.69	1115.69		-0.001	-1	333	341	FVQLVQLLR				52		99.845								Mascot
		1121.6	1121.59		-0.0059	-5	348	356	IEAIWSQFK														Mascot
		1382.79	1382.68		-0.1062	-77	303	315	ISDAPAQIVEVLK														Mascot
		1432.67	1432.65		-0.0168	-12	184	194	DLSHCQERIMK								Carbamidomethyl (C)[5], Oxidation (M)[10]						Mascot
		1477.91	1477.91		-0.0001	0	532	544	LVQPIALQLVLDR														Mascot
		1515.75	1515.75		-0.0027	-2	733	745	VFGQEVAYVNFDK														Mascot
		1608.84	1608.83		-0.0036	-2	668	683	AYLAGAAADVVEFGVR														Mascot
		1666.88	1666.88		0.0004	0	483	498	VMGNAGHPSSLKPIMK														Mascot
		1695.9	1695.89		-0.0068	-4	119	134	VFAPAGVSPTVMNLHR														Mascot
		1699.94	1699.93		-0.0045	-3	34	49	YEALLLGGLPQEGLAR														Mascot
		1699.94	1699.93		-0.0045	-3	34	49	YEALLLGGLPQEGLAR				80		100								Mascot
		1711.89	1711.89		-0.0039	-2	119	134	VFAPAGVSPTVMNLHR								Oxidation (M)[12]						Mascot
		1936.92	1936.92		-0.0021	-1	147	163	TQNIYELQEAGAQGVCR								Carbamidomethyl (C)[16]						Mascot
		2218.16	2218.13		-0.0347	-16	1326	1345	DIYLPVTVPINPDGTFTID														Mascot
									K
		2233.2	2233.08		-0.1189	-53	593	614	SLTRITAPDMAYVAGAAN														Mascot
									VAIK
		2269.2	2269.26		0.0652	29	1177	1196	ADQKLLGYQLAAYFDKPT														Mascot
									AR
		2269.2	2269.26		0.0652	29	1177	1196	ADQKLLGYQLAAYFDKPT														Mascot
									AR
		2299.23	2299.18		-0.0461	-20	1039	1058	QINIIDDDTPEGQAFLLKL														Mascot
									R
	8	novel protein similar to vitellogenin 1 (vg1) [Danio rerio]						gi|94733733		149143	8.92		19		183		100	130	100
		Peptide Information
		Calc. Mass		Obsrv. Mass	± da	± ppm	Start	End	Sequence					Ion	C. I. %		Modification					Rank	Result Type
							Seq.	Seq.						Score
		864.446	864.509		0.0624	72	91	98	DSFVPATK														Mascot
		1023.51	1023.51		-0.0039	-4	199	207	DVGLAYTER														Mascot
		1045.55	1045.56		0.0166	16	1350	1357	DFLSWIHK														Mascot
		1097.67	1097.66		-0.0031	-3	518	527	VQVDAILALR														Mascot
		1115.69	1115.69		-0.001	-1	337	345	FVQLVQLLR														Mascot
		1115.69	1115.69		-0.001	-1	337	345	FVQLVQLLR				52		99.845								Mascot
		1121.6	1121.59		-0.0059	-5	352	360	IEAIWSQFK														Mascot
		1382.79	1382.68		-0.1062	-77	307	319	ISDAPAQIVEVLK														Mascot
		1432.67	1432.65		-0.0168	-12	188	198	DLSHCQERIMK								Carbamidomethyl (C)[5], Oxidation (M)[10]						Mascot
		1477.91	1477.91		-0.0001	0	536	548	LVQPIALQLVLDR														Mascot
		1515.75	1515.75		-0.0027	-2	737	749	VFGQEVAYVNFDK														Mascot
		1608.84	1608.83		-0.0036	-2	672	687	AYLAGAAADVVEFGVR														Mascot
		1666.88	1666.88		0.0004	0	487	502	VMGNAGHPSSLKPIMK														Mascot
		1695.9	1695.89		-0.0068	-4	123	138	VFAPAGVSPTVMNLHR														Mascot
		1699.94	1699.93		-0.0045	-3	38	53	YEALLLGGLPQEGLAR														Mascot
		1699.94	1699.93		-0.0045	-3	38	53	YEALLLGGLPQEGLAR				80		100								Mascot
		1711.89	1711.89		-0.0039	-2	123	138	VFAPAGVSPTVMNLHR								Oxidation (M)[12]						Mascot
		1936.92	1936.92		-0.0021	-1	151	167	TQNIYELQEAGAQGVCR								Carbamidomethyl (C)[16]						Mascot
		2218.16	2218.13		-0.0347	-16	1330	1349	DIYLPVTVPINPDGTFTID														Mascot
									K
		2233.2	2233.08		-0.1189	-53	597	618	SLTRITAPDMAYVAGAAN														Mascot
									VAIK
		2269.2	2269.26		0.0652	29	1181	1200	ADQKLLGYQLAAYFDKPT														Mascot
									AR
		2269.2	2269.26		0.0652	29	1181	1200	ADQKLLGYQLAAYFDKPT														Mascot
									AR
		2299.23	2299.18		-0.0461	-20	1043	1062	QINIIDDDTPEGQAFLLKL														Mascot
									R
	9	vitellogenin 1 [Danio rerio]						gi|166795887		149452	8.68		17		174		100	132	100
		Peptide Information
		Calc. Mass		Obsrv. Mass	± da	± ppm	Start	End	Sequence					Ion	C. I. %		Modification					Rank	Result Type
							Seq.	Seq.						Score
		888.53	888.526		-0.0045	-5	425	432	FATIPALR														Mascot
		1088.54	1088.62		0.0745	68	415	424	MTASLATHEK														Mascot
		1097.67	1097.66		-0.0031	-3	514	523	VQVDAILALR														Mascot
		1115.69	1115.69		-0.001	-1	333	341	FVQLVQLLR														Mascot
		1115.69	1115.69		-0.001	-1	333	341	FVQLVQLLR				52		99.845								Mascot
		1121.6	1121.59		-0.0059	-5	348	356	IEAIWSQFK														Mascot
		1382.79	1382.68		-0.1062	-77	303	315	ISDAPAQIVEVLK														Mascot
		1432.67	1432.65		-0.0168	-12	184	194	DLSHCQERIMK								Carbamidomethyl (C)[5], Oxidation (M)[10]						Mascot
		1463.89	1463.89		-0.0015	-1	532	544	LVQPVALQLVLDR														Mascot
		1515.75	1515.75		-0.0027	-2	733	745	VFGQEVAYVNFDK														Mascot
		1666.88	1666.88		0.0004	0	483	498	VMGNAGHPSSLKPIMK														Mascot
		1695.9	1695.89		-0.0068	-4	119	134	VFAPAGVSPTVMNLHR														Mascot
		1699.94	1699.93		-0.0045	-3	34	49	YEALLLGGLPQEGLAR														Mascot
		1699.94	1699.93		-0.0045	-3	34	49	YEALLLGGLPQEGLAR				80		100								Mascot
		1711.89	1711.89		-0.0039	-2	119	134	VFAPAGVSPTVMNLHR								Oxidation (M)[12]						Mascot
		1954.87	1954.87		-0.0008	0	147	163	TQNIYEMQEAGAQGVCR								Carbamidomethyl (C)[16]						Mascot
		2233.2	2233.08		-0.1189	-53	593	614	SLTRITAPDMAYVAGAAN														Mascot
									VAIK
		2269.2	2269.26		0.0652	29	1179	1198	ADQKLLGYQLAAYFDKPT														Mascot
									AR
		2269.2	2269.26		0.0652	29	1179	1198	ADQKLLGYQLAAYFDKPT														Mascot
									AR
		2299.23	2299.18		-0.0461	-20	1039	1058	QINIIDDDTPEGQAFLLKL														Mascot
									R
		2627.37	2627.37		-0.0042	-2	897	920	VEALPVELPEHIASASFET														Mascot
									YAVVR
	10	novel protein similar to vitellogenin 1 (vg1) [Danio rerio]						gi|94733734		149808	8.83		16		169		100	132	100
		Peptide Information
		Calc. Mass		Obsrv. Mass	± da	± ppm	Start	End	Sequence					Ion	C. I. %		Modification					Rank	Result Type
							Seq.	Seq.						Score
		864.446	864.509		0.0624	72	91	98	DSFVPATK														Mascot
		1023.51	1023.51		-0.0039	-4	199	207	DVGLAYTER														Mascot
		1097.67	1097.66		-0.0031	-3	518	527	VQVDAILALR														Mascot
		1115.69	1115.69		-0.001	-1	337	345	FVQLVQLLR														Mascot
		1115.69	1115.69		-0.001	-1	337	345	FVQLVQLLR				52		99.845								Mascot
		1121.6	1121.59		-0.0059	-5	352	360	IEAIWSQFK														Mascot
		1432.67	1432.65		-0.0168	-12	188	198	DLSHCQERIMK								Carbamidomethyl (C)[5], Oxidation (M)[10]						Mascot
		1463.89	1463.89		-0.0015	-1	536	548	LVQPVALQLVLDR														Mascot
		1515.75	1515.75		-0.0027	-2	737	749	VFGQEVAYVNFDK														Mascot
		1666.88	1666.88		0.0004	0	487	502	VMGNAGHPSSLKPIMK														Mascot
		1695.9	1695.89		-0.0068	-4	123	138	VFAPAGVSPTVMNLHR														Mascot
		1699.94	1699.93		-0.0045	-3	38	53	YEALLLGGLPQEGLAR														Mascot
		1699.94	1699.93		-0.0045	-3	38	53	YEALLLGGLPQEGLAR				80		100								Mascot
		1711.89	1711.89		-0.0039	-2	123	138	VFAPAGVSPTVMNLHR								Oxidation (M)[12]						Mascot
		1936.92	1936.92		-0.0021	-1	151	167	TQNIYELQEAGAQGVCR								Carbamidomethyl (C)[16]						Mascot
		2194.05	2194.09		0.0415	19	1063	1083	EILDTEAKNAPVSSESSS														Mascot
									SSR
		2233.2	2233.08		-0.1189	-53	597	618	SLTRITAPDMAYVAGAAN														Mascot
									VAIK
		2269.2	2269.26		0.0652	29	1186	1205	ADQKLLGYQLAAYFDKPT														Mascot
									AR
		2269.2	2269.26		0.0652	29	1186	1205	ADQKLLGYQLAAYFDKPT														Mascot
									AR
		2299.23	2299.18		-0.0461	-20	1043	1062	QINIIDDDTPEGQAFLLKL														Mascot
									R
Gel Idx/Pos			178/H5						Instr./Gel Origin			BA2060/110707A							Process Status		Analysis Succeeded
Plate [#] Name			[1] 31496						Instrument Sample Name										Spectra		11
Rank		Protein Name						Accession No.		Protein MW	Protein		Pep.		Protein		Protein	Total Ion	Total Ion
											PI		Count		Score		Score	Score	C. I. %
																	C. I. %
	1	transitional endoplasmic reticulum ATPase [Danio rerio]						gi|41393119		89367.7	5.14		34		1310		100	1047	100
		Peptide Information
		Calc. Mass		Obsrv. Mass	± da	± ppm	Start	End	Sequence					Ion	C. I. %		Modification					Rank	Result Type
							Seq.	Seq.						Score
		819.472	819.464		-0.0081	-10	149	155	GDIFLVR														Mascot
		837.531	837.522		-0.0085	-10	232	239	AIGVKPPR														Mascot
		947.567	947.555		-0.0127	-13	148	155	KGDIFLVR														Mascot
		986.534	986.519		-0.0149	-15	218	225	EMVELPLR														Mascot
		989.49	989.48		-0.0096	-10	701	708	ESIENEIR														Mascot
		1051.52	1051.51		-0.0138	-13	46	53	MDELQLFR														Mascot
		1067.52	1067.51		-0.0122	-11	46	53	MDELQLFR								Oxidation (M)[1]						Mascot
		1075.54	1075.52		-0.0131	-12	278	287	LAGESESNLR														Mascot
		1145.59	1145.58		-0.0118	-10	701	709	ESIENEIRR														Mascot
		1162.53	1162.52		-0.0126	-11	733	741	KDHFEEAMR														Mascot
		1172.67	1172.66		-0.012	-10	240	251	GILLYGPPGTGK														Mascot
		1242.63	1242.62		-0.0129	-10	366	377	EVDIGIPDATGR														Mascot
		1251.62	1251.6		-0.0148	-12	513	524	GVLFYGPPGCGK								Carbamidomethyl (C)[10]						Mascot
		1329.69	1329.68		-0.0149	-11	454	465	WALSQSNPSALR				96		100								Mascot
		1329.69	1329.68		-0.0149	-11	454	465	WALSQSNPSALR														Mascot
		1540.8	1540.78		-0.0196	-13	96	109	LGDVISIQPCPDVK								Carbamidomethyl (C)[10]						Mascot
		1556.86	1556.84		-0.0195	-13	639	651	LDQLIYIPLPDEK														Mascot
		1578.79	1578.77		-0.0205	-13	530	543	AIANECQANFISIK								Carbamidomethyl (C)[6]						Mascot
		1578.79	1578.77		-0.0205	-13	530	543	AIANECQANFISIK				67		99.996		Carbamidomethyl (C)[6]						Mascot
		1629.81	1629.79		-0.02	-12	754	766	KYEMFAQTLQQSR				88		100								Mascot
		1629.81	1629.79		-0.02	-12	754	766	KYEMFAQTLQQSR														Mascot
		1645.8	1645.78		-0.0182	-11	754	766	KYEMFAQTLQQSR								Oxidation (M)[4]						Mascot
		1660.83	1660.78		-0.0452	-27	363	377	FDREVDIGIPDATGR														Mascot
		1799.81	1799.78		-0.0221	-12	678	693	MTNGFSGADLTEICQR								Carbamidomethyl (C)[14]						Mascot
		1810.99	1810.98		-0.0197	-11	296	312	NAPAIIFIDELDAIAPK														Mascot
		1815.8	1815.78		-0.018	-10	678	693	MTNGFSGADLTEICQR								Carbamidomethyl (C)[14], Oxidation (M)[1]						Mascot
		1823.92	1823.89		-0.0234	-13	488	502	ELQELVQYPVEHPDK														Mascot
		1823.92	1823.89		-0.0234	-13	488	502	ELQELVQYPVEHPDK				62		99.986								Mascot
		1923.95	1923.93		-0.0241	-13	568	584	QAAPCVLFFDELDSIAK								Carbamidomethyl (C)[5]						Mascot
		1951.92	1951.9		-0.021	-11	544	560	GPELLTMWFGESEANVR				102		100		Oxidation (M)[7]						Mascot
		1951.92	1951.9		-0.021	-11	544	560	GPELLTMWFGESEANVR								Oxidation (M)[7]						Mascot
		2124.92	2124.9		-0.0249	-12	192	210	EDEEESLNEVGYDDIGG														Mascot
									VR
		2124.92	2124.9		-0.0249	-12	192	210	EDEEESLNEVGYDDIGG				142		100								Mascot
									VR
		2146.16	2146.13		-0.0207	-10	339	358	AHVIVMAATNRPNSIDPA														Mascot
									LR
		2155.98	2155.95		-0.0283	-13	714	732	QTNPSAMEVEEDDPVPEI														Mascot
									R
		2160.1	2160.06		-0.0442	-20	26	45	LIVDESINEDNSVVSLSQA														Mascot
									K
		2162.15	2162.12		-0.0312	-14	339	358	AHVIVMAATNRPNSIDPA								Oxidation (M)[6]						Mascot
									LR
		2171.98	2171.96		-0.0147	-7	714	732	QTNPSAMEVEEDDPVPEI								Oxidation (M)[7]						Mascot
									R
		2256.14	2256.08		-0.0564	-25	257	277	AVANETGAFFFLINGPEI														Mascot
									MSK
		2284.08	2284.15		0.0737	32	714	733	QTNPSAMEVEEDDPVPEI														Mascot
									RK
		2457.12	2457.34		0.2241	91	712	732	ERQTNPSAMEVEEDDPV								Oxidation (M)[9]						Mascot
									PEIR
		2484.26	2484.24		-0.0215	-9	466	487	ETVVEVPNITWEDIGGLD														Mascot
									DVKR
		2484.26	2484.24		-0.0215	-9	466	487	ETVVEVPNITWEDIGGLD				217		100								Mascot
									DVKR
		2518.43	2518.41		-0.0164	-7	616	638	NVFIIGATNRPDIIDPAILR				22		0								Mascot
									PGR
		2518.43	2518.41		-0.0164	-7	616	638	NVFIIGATNRPDIIDPAILR														Mascot
									PGR
		3081.5	3081.49		-0.0162	-5	165	191	VVETDPSPYCIVAPDTVIH								Carbamidomethyl (C)[10,20]						Mascot
									CEGEPIKR
		3672.79	3672.77		-0.0214	-6	390	424	LADDVDLEQVANETHGH				252		100		Carbamidomethyl (C)[26]						Mascot
									VGADLAALCSEAALQAIR
		3672.79	3672.77		-0.0214	-6	390	424	LADDVDLEQVANETHGH								Carbamidomethyl (C)[26]						Mascot
									VGADLAALCSEAALQAIR
	2	CDC48 [Danio rerio]						gi|34740143		89351.7	5.13		32		1280		100	1047	100
		Peptide Information
		Calc. Mass		Obsrv. Mass	± da	± ppm	Start	End	Sequence					Ion	C. I. %		Modification					Rank	Result Type
		Calc. Mass		Obsrv. Mass	± da	± ppm	Seq.	Seq.	Sequence					Score	C. I. %		Modification					Rank	Result Type
		819.472	819.464		-0.0081	-10	149	155	GDIFLVR														Mascot
		837.531	837.522		-0.0085	-10	232	239	AIGVKPPR														Mascot
		947.567	947.555		-0.0127	-13	148	155	KGDIFLVR														Mascot
		986.534	986.519		-0.0149	-15	218	225	EMVELPLR														Mascot
		989.49	989.48		-0.0096	-10	701	708	ESIENEIR														Mascot
		1051.52	1051.51		-0.0138	-13	46	53	MDELQLFR														Mascot
		1067.52	1067.51		-0.0122	-11	46	53	MDELQLFR								Oxidation (M)[1]						Mascot
		1075.54	1075.52		-0.0131	-12	278	287	LAGESESNLR														Mascot
		1162.53	1162.52		-0.0126	-11	733	741	KDHFEEAMR														Mascot
		1172.67	1172.66		-0.012	-10	240	251	GILLYGPPGTGK														Mascot
		1242.63	1242.62		-0.0129	-10	366	377	EVDIGIPDATGR														Mascot
		1251.62	1251.6		-0.0148	-12	513	524	GVLFYGPPGCGK								Carbamidomethyl (C)[10]						Mascot
		1329.69	1329.68		-0.0149	-11	454	465	WALSQSNPSALR				96		100								Mascot
		1329.69	1329.68		-0.0149	-11	454	465	WALSQSNPSALR														Mascot
		1540.8	1540.78		-0.0196	-13	96	109	LGDVISIQPCPDVK								Carbamidomethyl (C)[10]						Mascot
		1578.79	1578.77		-0.0205	-13	530	543	AIANECQANFISIK								Carbamidomethyl (C)[6]						Mascot
		1578.79	1578.77		-0.0205	-13	530	543	AIANECQANFISIK				67		99.996		Carbamidomethyl (C)[6]						Mascot
		1629.81	1629.79		-0.02	-12	754	766	KYEMFAQTLQQSR				88		100								Mascot
		1629.81	1629.79		-0.02	-12	754	766	KYEMFAQTLQQSR														Mascot
		1645.8	1645.78		-0.0182	-11	754	766	KYEMFAQTLQQSR								Oxidation (M)[4]						Mascot
		1660.83	1660.78		-0.0452	-27	363	377	FDREVDIGIPDATGR														Mascot
		1799.81	1799.78		-0.0221	-12	678	693	MTNGFSGADLTEICQR								Carbamidomethyl (C)[14]						Mascot
		1810.99	1810.98		-0.0197	-11	296	312	NAPAIIFIDELDAIAPK														Mascot
		1815.8	1815.78		-0.018	-10	678	693	MTNGFSGADLTEICQR								Carbamidomethyl (C)[14], Oxidation (M)[1]						Mascot
		1823.92	1823.89		-0.0234	-13	488	502	ELQELVQYPVEHPDK														Mascot
		1823.92	1823.89		-0.0234	-13	488	502	ELQELVQYPVEHPDK				62		99.986								Mascot
		1923.95	1923.93		-0.0241	-13	568	584	QAAPCVLFFDELDSIAK								Carbamidomethyl (C)[5]						Mascot
		1951.92	1951.9		-0.021	-11	544	560	GPELLTMWFGESEANVR				102		100		Oxidation (M)[7]						Mascot
		1951.92	1951.9		-0.021	-11	544	560	GPELLTMWFGESEANVR								Oxidation (M)[7]						Mascot
		2124.92	2124.9		-0.0249	-12	192	210	EDEEESLNEVGYDDIGG														Mascot
									VR
		2124.92	2124.9		-0.0249	-12	192	210	EDEEESLNEVGYDDIGG				142		100								Mascot
									VR
		2146.16	2146.13		-0.0207	-10	339	358	AHVIVMAATNRPNSIDPA														Mascot
									LR
		2155.98	2155.95		-0.0283	-13	714	732	QTNPSAMEVEEDDPVPEI														Mascot
									R
		2160.1	2160.06		-0.0442	-20	26	45	LIVDESINEDNSVVSLSQA														Mascot
									K
		2162.15	2162.12		-0.0312	-14	339	358	AHVIVMAATNRPNSIDPA								Oxidation (M)[6]						Mascot
									LR
		2171.98	2171.96		-0.0147	-7	714	732	QTNPSAMEVEEDDPVPEI								Oxidation (M)[7]						Mascot
									R
		2256.14	2256.08		-0.0564	-25	257	277	AVANETGAFFFLINGPEI														Mascot
									MSK
		2284.08	2284.15		0.0737	32	714	733	QTNPSAMEVEEDDPVPEI														Mascot
									RK
		2457.12	2457.34		0.2241	91	712	732	ERQTNPSAMEVEEDDPV								Oxidation (M)[9]						Mascot
									PEIR
		2484.26	2484.24		-0.0215	-9	466	487	ETVVEVPNITWEDIGGLD														Mascot
									DVKR
		2484.26	2484.24		-0.0215	-9	466	487	ETVVEVPNITWEDIGGLD				217		100								Mascot
									DVKR
		2518.43	2518.41		-0.0164	-7	616	638	NVFIIGATNRPDIIDPAILR				22		0								Mascot
									PGR
		2518.43	2518.41		-0.0164	-7	616	638	NVFIIGATNRPDIIDPAILR														Mascot
									PGR
		3081.5	3081.49		-0.0162	-5	165	191	VVETDPSPYCIVAPDTVIH								Carbamidomethyl (C)[10,20]						Mascot
									CEGEPIKR
		3672.79	3672.77		-0.0214	-6	390	424	LADDVDLEQVANETHGH				252		100		Carbamidomethyl (C)[26]						Mascot
									VGADLAALCSEAALQAIR
		3672.79	3672.77		-0.0214	-6	390	424	LADDVDLEQVANETHGH								Carbamidomethyl (C)[26]						Mascot
									VGADLAALCSEAALQAIR
	3	transitional endoplasmic reticulum ATPase-like [Danio						gi|90093334		89437.9	5.44		15		363		100	308	100
		rerio]
		Peptide Information
		Calc. Mass		Obsrv. Mass	± da	± ppm	Start	End	Sequence					Ion	C. I. %		Modification					Rank	Result Type
							Seq.	Seq.						Score
		819.472	819.464		-0.0081	-10	151	157	GDIFLVR														Mascot
		837.531	837.522		-0.0085	-10	234	241	AIGVKPPR														Mascot
		986.534	986.519		-0.0149	-15	220	227	EMVELPLR														Mascot
		1075.54	1075.52		-0.0131	-12	280	289	LAGESESNLR														Mascot
		1162.53	1162.52		-0.0126	-11	735	743	KDHFEEAMR														Mascot
		1172.67	1172.66		-0.012	-10	242	253	GILLYGPPGTGK														Mascot
		1251.62	1251.6		-0.0148	-12	515	526	GVLFYGPPGCGK								Carbamidomethyl (C)[10]						Mascot
		1329.69	1329.68		-0.0149	-11	456	467	WALSQSNPSALR				96		100								Mascot
		1329.69	1329.68		-0.0149	-11	456	467	WALSQSNPSALR														Mascot
		1629.81	1629.79		-0.02	-12	756	768	KYEMFAQTLQQSR				88		100								Mascot
		1629.81	1629.79		-0.02	-12	756	768	KYEMFAQTLQQSR														Mascot
		1645.8	1645.78		-0.0182	-11	756	768	KYEMFAQTLQQSR								Oxidation (M)[4]						Mascot
		1810.99	1810.98		-0.0197	-11	298	314	NAPAIIFIDELDAIAPK														Mascot
		1823.83	1823.89		0.0678	37	68	83	QTVCIVLTDDTCGNER								Carbamidomethyl (C)[4]						Mascot
		1823.83	1823.89		0.0678	37	68	83	QTVCIVLTDDTCGNER								Carbamidomethyl (C)[4]						Mascot
		1951.92	1951.9		-0.021	-11	546	562	GPELLTMWFGESEANVR				102		100		Oxidation (M)[7]						Mascot
		1951.92	1951.9		-0.021	-11	546	562	GPELLTMWFGESEANVR								Oxidation (M)[7]						Mascot
		2156.01	2155.95		-0.0581	-27	680	698	ITEGFSGADLTEICQRAC								Carbamidomethyl (C)[14,18]						Mascot
									K
		2256.14	2256.08		-0.0564	-25	259	279	AVANETGAFFFLINGPEI														Mascot
									MSK
		2518.43	2518.41		-0.0164	-7	618	640	NVFIIGATNRPDIIDPAILR				22		0								Mascot
									PGR
		2518.43	2518.41		-0.0164	-7	618	640	NVFIIGATNRPDIIDPAILR														Mascot
									PGR
	4	Zgc:162848 protein [Danio rerio]						gi|141795670		51350.1	5.88		9		52		71.922	17	0
		Peptide Information
		Calc. Mass		Obsrv. Mass	± da	± ppm	Start	End	Sequence					Ion	C. I. %		Modification					Rank	Result Type
							Seq.	Seq.						Score
		947.479	947.555		0.0753	79	90	98	AETDAATLR														Mascot
		1045.54	1045.55		0.0089	9	174	182	DAVEEELLK														Mascot
		1126.63	1126.57		-0.0606	-54	351	360	EAPLRVAQSR														Mascot
		1329.75	1329.68		-0.0724	-54	196	206	KTLDQTINQIR				17		0								Mascot
		1329.75	1329.68		-0.0724	-54	196	206	KTLDQTINQIR														Mascot
		1473.77	1473.76		-0.0021	-1	271	283	LAEREETASQALR														Mascot
		1816.91	1816.77		-0.1394	-77	361	374	LHYRTLRPNMEQCR														Mascot
		1967.88	1967.9		0.0199	10	223	238	QQAYTLDDHCGRFSNR								Carbamidomethyl (C)[10]						Mascot
		1967.88	1967.9		0.0199	10	223	238	QQAYTLDDHCGRFSNR				3		0		Carbamidomethyl (C)[10]						Mascot
		2154.99	2154.94		-0.0513	-24	245	262	HPSSAVLQDQVCDEEVW								Carbamidomethyl (C)[12]						Mascot
									R
		2283.08	2283.15		0.0708	31	245	263	HPSSAVLQDQVCDEEVW								Carbamidomethyl (C)[12]						Mascot
									RK
	5	PREDICTED: myosin-X [Danio rerio]						gi|326665155		237030	6.18		21		46		0
		Peptide Information
		Calc. Mass		Obsrv. Mass	± da	± ppm	Start	End	Sequence					Ion	C. I. %		Modification					Rank	Result Type
							Seq.	Seq.						Score
		1045.6	1045.55		-0.05	-48	1416	1425	GSSQANLKLK														Mascot
		1145.47	1145.58		0.1111	97	2	10	DNFFTEGCR								Carbamidomethyl (C)[8]						Mascot
		1165.63	1165.73		0.0984	84	1893	1902	SSFLEGTLRR														Mascot
		1172.66	1172.66		-0.0079	-7	693	703	ALALSEDLKGR														Mascot
		1329.71	1329.68		-0.0361	-27	571	581	DDVLNLLRESR														Mascot
		1329.71	1329.68		-0.0361	-27	571	581	DDVLNLLRESR														Mascot
		1438.67	1438.71		0.0399	28	1942	1953	LQGMEQDQAMKK								Oxidation (M)[4,10]						Mascot
		1520.77	1520.9		0.1225	81	466	477	HIFSLEQLEYNK														Mascot
		1533.79	1533.75		-0.0416	-27	1679	1691	YAAFSQDALRHVR														Mascot
		1540.65	1540.78		0.1358	88	2056	2069	FSTCQSISSHGSNW														Mascot
		1718.91	1718.89		-0.0179	-10	1830	1844	YPAPEETLQFLAALR														Mascot
		1799.89	1799.78		-0.1108	-62	1207	1219	WCVLKDETFLWFR								Carbamidomethyl (C)[2]						Mascot
		1800.96	1800.77		-0.1828	-102	687	701	YYVLMRALALSEDLK								Oxidation (M)[5]						Mascot
		1823.9	1823.89		-0.0016	-1	1525	1539	ENCLNSEVVEQIYKR														Mascot
		1823.9	1823.89		-0.0016	-1	1525	1539	ENCLNSEVVEQIYKR														Mascot
		1952.06	1951.9		-0.1586	-81	2029	2045	ELLFNTSMVVDIAKLMK														Mascot
		1952.06	1951.9		-0.1586	-81	2029	2045	ELLFNTSMVVDIAKLMK														Mascot
		1968.05	1967.9		-0.1568	-80	2029	2045	ELLFNTSMVVDIAKLMK								Oxidation (M)[8]						Mascot
		1968.05	1967.9		-0.1568	-80	2029	2045	ELLFNTSMVVDIAKLMK								Oxidation (M)[8]						Mascot
		2124.96	2124.9		-0.0596	-28	400	416	DSMAMALYSQCFTWIIR								Carbamidomethyl (C)[11], Oxidation (M)[3,5]						Mascot
		2124.96	2124.9		-0.0596	-28	400	416	DSMAMALYSQCFTWIIR								Carbamidomethyl (C)[11], Oxidation (M)[3,5]						Mascot
		2233.1	2233.06		-0.0384	-17	124	142	HHLGEIPPHIYAIANECYR														Mascot
		2256.06	2256.08		0.0205	9	968	986	AAQQFLTSLNFDEIDECV								Carbamidomethyl (C)[17]						Mascot
									R
		2283.15	2283.15		0.003	1	1913	1932	QEEEPAAIEVWLQDEKA														Mascot
									GLK
		2484.33	2484.24		-0.0877	-35	330	353	LLSGILHVGNIEFLTAGGA								Carbamidomethyl (C)[22]						Mascot
									QVCSK
		2484.33	2484.24		-0.0877	-35	330	353	LLSGILHVGNIEFLTAGGA								Carbamidomethyl (C)[22]						Mascot
									QVCSK
		2518.21	2518.41		0.196	78	189	212	TASSHVEEAILESSPIMEA														Mascot
									FGNAK
		2518.21	2518.41		0.196	78	189	212	TASSHVEEAILESSPIMEA														Mascot
									FGNAK
		3672.72	3672.77		0.0459	12	1798	1829	LFCFSEPENVPADSVEFA														Mascot
									FMFEQAHEAVIRGR
		3672.72	3672.77		0.0459	12	1798	1829	LFCFSEPENVPADSVEFA														Mascot
									FMFEQAHEAVIRGR
	6	PREDICTED: nephronectin-like [Danio rerio]						gi|326664063		25190.6	6.49		10		46		0
		Peptide Information
		Calc. Mass		Obsrv. Mass	± da	± ppm	Start	End	Sequence					Ion	C. I. %		Modification					Rank	Result Type
							Seq.	Seq.						Score
		819.439	819.464		0.0248	30	141	147	LDCISLR														Mascot
		882.508	882.555		0.0466	53	2	8	PFKSYIK														Mascot
		947.534	947.555		0.0203	21	140	147	KLDCISLR														Mascot
		1126.48	1126.57		0.0953	85	148	156	CQFGCQIDR								Carbamidomethyl (C)[1]						Mascot
		1162.47	1162.52		0.0494	42	84	93	CSCMEGYKGK								Carbamidomethyl (C)[1]						Mascot
		1520.67	1520.9		0.2237	147	71	83	RPCENGFCIGPDR								Carbamidomethyl (C)[3]						Mascot
		2000.85	2001.06		0.2135	107	42	59	APGVCALEPSMTCCYGW								Carbamidomethyl (C)[5]						Mascot
									R
		2040.94	2041.07		0.1318	65	141	156	LDCISLRCQFGCQIDR								Carbamidomethyl (C)[3,8,12]						Mascot
		2159.98	2160.06		0.0739	34	157	175	NDEVGCVCPPGLQLAPD								Carbamidomethyl (C)[6,8]						Mascot
									YR
		2161.82	2162.12		0.2967	137	179	197	DINECDDPSHTCTEHQS														Mascot
									CK
	7	26S proteasome non-ATPase regulatory subunit 2						gi|41054527		99415.5	5.24		14		43		0
		[Danio rerio]
		Peptide Information
		Calc. Mass		Obsrv. Mass	± da	± ppm	Start	End	Sequence					Ion	C. I. %		Modification					Rank	Result Type
							Seq.	Seq.						Score
		1165.61	1165.73		0.1195	103	249	257	FNRYPEALR														Mascot
		1473.78	1473.76		-0.0207	-14	432	446	SGALLACGIVNSGVR								Carbamidomethyl (C)[7]						Mascot
		1520.92	1520.9		-0.019	-12	678	692	AVPLALALISVSNPR														Mascot
		1629.89	1629.79		-0.1039	-64	730	743	LAAMLRQLAQYHAK								Oxidation (M)[4]						Mascot
		1629.89	1629.79		-0.1039	-64	730	743	LAAMLRQLAQYHAK								Oxidation (M)[4]						Mascot
		1718.9	1718.89		-0.0115	-7	803	817	SHYILYGLVAAMQPR														Mascot
		1810.89	1810.98		0.0847	47	599	613	VQQLLHICSEHFDNK														Mascot
		1973.97	1973.95		-0.0252	-13	134	150	LLGSQEELASWGHEYVR														Mascot
		2001.08	2001.06		-0.0217	-11	818	834	MLVTFDEELRPLPVSVR														Mascot
		2041.1	2041.07		-0.0234	-11	560	578	GEAIETTLAALQVVPEPF														Mascot
									R
		2049.09	2049.06		-0.0227	-11	850	868	AITGFQTHTTPVLLAHGE														Mascot
									R
		2172.08	2171.96		-0.1204	-55	159	176	EWQEIEEGDKAQQEVLL														Mascot
									K
		2225.12	2225.1		-0.0222	-10	258	276	LALMLNDVELVENIFTSC								Carbamidomethyl (C)[18], Oxidation (M)[4]						Mascot
									K
		2457.36	2457.34		-0.0198	-8	869	890	AELATEEFIPVTPILEGFVI														Mascot
									LR
		2518.5	2518.41		-0.0877	-35	678	701	AVPLALALISVSNPRLNIL														Mascot
									DTLSK
		2518.5	2518.41		-0.0877	-35	678	701	AVPLALALISVSNPRLNIL														Mascot
									DTLSK
	8	LOC559407 protein [Danio rerio]						gi|108742068		52727.9	5.76		8		42		0	17	0
		Peptide Information
		Calc. Mass		Obsrv. Mass	± da	± ppm	Start	End	Sequence					Ion	C. I. %		Modification					Rank	Result Type
							Seq.	Seq.						Score
		947.479	947.555		0.0753	79	102	110	AETDAATLR														Mascot
		1045.54	1045.55		0.0089	9	186	194	DAVEEELLK														Mascot
		1126.63	1126.57		-0.0606	-54	363	372	EAPLRVAQSR														Mascot
		1329.75	1329.68		-0.0724	-54	208	218	KTLDQTINQIR				17		0								Mascot
		1329.75	1329.68		-0.0724	-54	208	218	KTLDQTINQIR														Mascot
		1473.77	1473.76		-0.0021	-1	283	295	LAEREETASQALR														Mascot
		1816.91	1816.77		-0.1394	-77	373	386	LHYRTLRPNMEQCR														Mascot
		2154.99	2154.94		-0.0513	-24	257	274	HPSSAVLQDQVCDEEVW								Carbamidomethyl (C)[12]						Mascot
									R
		2283.08	2283.15		0.0708	31	257	275	HPSSAVLQDQVCDEEVW								Carbamidomethyl (C)[12]						Mascot
									RK
	9	tektin-4 [Danio rerio]						gi|224589086		51528.2	5.75		8		41		0	17	0
		Peptide Information
		Calc. Mass		Obsrv. Mass	± da	± ppm	Start	End	Sequence					Ion	C. I. %		Modification					Rank	Result Type
							Seq.	Seq.						Score
		947.479	947.555		0.0753	79	91	99	AETDAATLR														Mascot
		1045.54	1045.55		0.0089	9	175	183	DAVEEELLK														Mascot
		1126.63	1126.57		-0.0606	-54	352	361	EAPLRVAQSR														Mascot
		1329.75	1329.68		-0.0724	-54	197	207	KTLDQTINQIR				17		0								Mascot
		1329.75	1329.68		-0.0724	-54	197	207	KTLDQTINQIR														Mascot
		1473.77	1473.76		-0.0021	-1	272	284	LAEREETASQALR														Mascot
		1816.91	1816.77		-0.1394	-77	362	375	LHYRTLRPNMEQCR														Mascot
		2154.99	2154.94		-0.0513	-24	246	263	HPSSAVLQDQVCDEEVW								Carbamidomethyl (C)[12]						Mascot
									R
		2283.08	2283.15		0.0708	31	246	264	HPSSAVLQDQVCDEEVW								Carbamidomethyl (C)[12]						Mascot
									RK
	10	PREDICTED: hypothetical protein LOC100537298						gi|326667816		6120	8.38		6		41		0
		[Danio rerio]
		Peptide Information
		Calc. Mass		Obsrv. Mass	± da	± ppm	Start	End	Sequence					Ion	C. I. %		Modification					Rank	Result Type
							Seq.	Seq.						Score
		1165.59	1165.73		0.1412	121	10	18	CLRVNYGQR								Carbamidomethyl (C)[1]						Mascot
		1282.66	1282.67		0.0142	11	2	12	AESSIFTRCLR														Mascot
		1578.75	1578.77		0.0228	14	38	51	VLSCMHLPTCAIMK								Oxidation (M)[5,13]						Mascot
		1578.75	1578.77		0.0228	14	38	51	VLSCMHLPTCAIMK								Oxidation (M)[5,13]						Mascot
		1660.8	1660.78		-0.0205	-12	38	51	VLSCMHLPTCAIMK								Carbamidomethyl (C)[4,10]						Mascot
		1718.86	1718.89		0.0359	21	37	51	RVLSCMHLPTCAIMK								Oxidation (M)[6]						Mascot
		1816.91	1816.77		-0.1389	-76	37	51	RVLSCMHLPTCAIMK								Carbamidomethyl (C)[5,11]						Mascot
		1974	1973.95		-0.0579	-29	38	54	VLSCMHLPTCAIMKVTL								Carbamidomethyl (C)[4,10]						Mascot
		2225.01	2225.1		0.0896	40	19	37	CANDCPDVLYNTAEQSL								Carbamidomethyl (C)[1]						Mascot
									RR
Gel Idx/Pos			179/H6						Instr./Gel Origin			BA2060/110707A							Process Status		Analysis Succeeded
Plate [#] Name			[1] 31496						Instrument Sample Name										Spectra		11
Rank		Protein Name						Accession No.		Protein MW	Protein		Pep.		Protein		Protein	Total Ion	Total Ion
											PI		Count		Score		Score	Score	C. I. %
																	C. I. %
	1	gelsolin b [Danio rerio]						gi|148230943		80133.8	5.62		12		257		100	217	100
		Peptide Information
		Calc. Mass		Obsrv. Mass	± da	± ppm	Start	End	Sequence					Ion	C. I. %		Modification					Rank	Result Type
							Seq.	Seq.						Score
		853.362	853.355		-0.0075	-9	179	184	CNQFER								Carbamidomethyl (C)[1]						Mascot
		875.466	875.456		-0.0105	-12	104	110	TFLGYFK														Mascot
		987.537	987.524		-0.013	-13	13	20	QTGLQVWR				51		99.81								Mascot
		987.537	987.524		-0.013	-13	13	20	QTGLQVWR														Mascot
		1007.48	1007.47		-0.0111	-11	676	684	YIESDPAGR														Mascot
		1022.51	1022.5		-0.0103	-10	2	9	VHHPEFEK														Mascot
		1100.57	1100.57		-0.0059	-5	367	376	VPFDASSLHK														Mascot
		1294.53	1294.51		-0.0125	-10	193	202	DIRDNECCGR								Carbamidomethyl (C)[7,8]						Mascot
		1456.68	1456.66		-0.0208	-14	308	320	AAEDFISQMGYPK														Mascot
		1472.67	1472.65		-0.0177	-12	308	320	AAEDFISQMGYPK								Oxidation (M)[9]						Mascot
		1625.75	1625.75		-0.0013	-1	203	216	AKLFVCEEGSENDK								Carbamidomethyl (C)[6]						Mascot
		1952.01	1951.99		-0.0269	-14	321	337	HTEVQIIPENGETPLFK														Mascot
		2097.13	2097.11		-0.0235	-11	451	472	GASAILAAQLDAELGGSA														Mascot
									VQVR
		2097.13	2097.11		-0.0235	-11	451	472	GASAILAAQLDAELGGSA				165		100								Mascot
									VQVR
		2152.1	2152.07		-0.0275	-13	32	50	NLYGGFYTGDTYLVLNTI														Mascot
									K
	2	acylamino-acid-releasing enzyme [Danio rerio]						gi|38564417		81411.5	5.72		9		125		100	105	100
		Peptide Information
		Calc. Mass		Obsrv. Mass	± da	± ppm	Start	End	Sequence					Ion	C. I. %		Modification					Rank	Result Type
							Seq.	Seq.						Score
		1100.59	1100.57		-0.0211	-19	116	123	QFLEIWHK														Mascot
		1205.65	1205.62		-0.0286	-24	433	444	VGFLPGKGSESK														Mascot
		1272.69	1272.7		0.0135	11	663	674	TPVLLMLGEGDK														Mascot
		1587.89	1587.86		-0.0204	-13	5	17	VLRDPVEISQLYR														Mascot
		1587.89	1587.86		-0.0204	-13	5	17	VLRDPVEISQLYR				43		98.845								Mascot
		1625.76	1625.75		-0.0125	-8	74	88	SVVYSGPSGNCTEIR								Carbamidomethyl (C)[11]						Mascot
		1815.89	1815.87		-0.0211	-12	349	365	AGDDGFTGIYSFLLSPR														Mascot
		1865.85	1865.82		-0.0235	-13	38	52	YGGQYSNIYTEWTQR				61		99.981								Mascot
		1865.85	1865.82		-0.0235	-13	38	52	YGGQYSNIYTEWTQR														Mascot
		1961.99	1961.97		-0.0201	-10	312	328	IVYLESGVFGPHLQCSR								Carbamidomethyl (C)[15]						Mascot
		2472.19	2472.16		-0.031	-13	395	415	EVTCLTSQSQEGSWNLL								Carbamidomethyl (C)[4]						Mascot
									NIHR
	3	Acylpeptide hydrolase [Danio rerio]						gi|55777111		81351.5	5.66		8		121		100	105	100
		Peptide Information
		Calc. Mass		Obsrv. Mass	± da	± ppm	Start	End	Sequence					Ion	C. I. %		Modification					Rank	Result Type
							Seq.	Seq.						Score
		1100.59	1100.57		-0.0211	-19	116	123	QFLEIWHK														Mascot
		1205.65	1205.62		-0.0286	-24	433	444	VGFLPGKGSESK														Mascot
		1272.69	1272.7		0.0135	11	663	674	TPVLLMLGEGDK														Mascot
		1587.89	1587.86		-0.0204	-13	5	17	VLRDPVEISQLYR														Mascot
		1587.89	1587.86		-0.0204	-13	5	17	VLRDPVEISQLYR				43		98.845								Mascot
		1625.76	1625.75		-0.0125	-8	74	88	SVVYSGPSGNCTEIR								Carbamidomethyl (C)[11]						Mascot
		1865.85	1865.82		-0.0235	-13	38	52	YGGQYSNIYTEWTQR				61		99.981								Mascot
		1865.85	1865.82		-0.0235	-13	38	52	YGGQYSNIYTEWTQR														Mascot
		1961.99	1961.97		-0.0201	-10	312	328	IVYLESGVFGPHLQCSR								Carbamidomethyl (C)[15]						Mascot
		2472.19	2472.16		-0.031	-13	395	415	EVTCLTSQSQEGSWNLL								Carbamidomethyl (C)[4]						Mascot
									NIHR
	4	coiled-coil-helix-coiled-coil-helix domain-containing						gi|53933232		27523	9.24		10		54		83.843
		protein 6 [Danio rerio]
		Peptide Information
		Calc. Mass		Obsrv. Mass	± da	± ppm	Start	End	Sequence					Ion	C. I. %		Modification					Rank	Result Type
							Seq.	Seq.						Score
		850.417	850.533		0.1163	137	164	169	NEERFR														Mascot
		850.417	850.533		0.1163	137	164	169	NEERFR														Mascot
		1045.54	1045.55		0.0147	14	108	116	EAARQDISR														Mascot
		1235.59	1235.62		0.0252	20	211	221	EQTLQCSDLAK														Mascot
		1294.65	1294.51		-0.1389	-107	75	85	TTFPDSKEELK														Mascot
		1371.64	1371.62		-0.0189	-14	222	232	EYMQCINAAKK								Carbamidomethyl (C)[5], Oxidation (M)[3]						Mascot
		1638.78	1638.84		0.059	36	168	181	FRMSAEQFHAAATR								Oxidation (M)[3]						Mascot
		1874.97	1874.92		-0.0511	-27	87	101	RYEQQQAIIQEELAR														Mascot
		1961.95	1961.97		0.0202	10	170	187	MSAEQFHAAATRSEANIK														Mascot
		2317.19	2317.14		-0.0468	-20	188	207	ARNVEPVCLNLQAQILNC														Mascot
									YR
		2501.15	2501.23		0.0781	31	211	231	EQTLQCSDLAKEYMQCI								Carbamidomethyl (C)[6,16]						Mascot
									NAAK
	5	hypothetical protein LOC553448 [Danio rerio]						gi|224496090		145429	8.16		17		47		7.024
		Peptide Information
		Calc. Mass		Obsrv. Mass	± da	± ppm	Start	End	Sequence					Ion	C. I. %		Modification					Rank	Result Type
							Seq.	Seq.						Score
		850.478	850.533		0.0547	64	161	169	AAPPAPAQK														Mascot
		850.478	850.533		0.0547	64	369	377	AAPPAPAQK														Mascot
		856.452	856.517		0.0644	75	170	178	SAPPASAQK														Mascot
		1007.51	1007.47		-0.0396	-39	781	789	VASVEVEMK								Oxidation (M)[8]						Mascot
		1100.61	1100.57		-0.0382	-35	657	665	LQQENSILR														Mascot
		1156.63	1156.6		-0.0351	-30	611	620	EQDIIALQAR														Mascot
		1163.61	1163.6		-0.0078	-7	1285	1295	MTKDLGQAATK														Mascot
		1179.6	1179.59		-0.013	-11	1285	1295	MTKDLGQAATK								Oxidation (M)[1]						Mascot
		1199.59	1199.56		-0.0334	-28	473	483	AEESKQDAPPK														Mascot
		1235.68	1235.62		-0.0594	-48	1014	1023	TKWLQDFAVK														Mascot
		1272.62	1272.7		0.0824	65	701	711	NDALQADEQLR														Mascot
		1312.73	1312.6		-0.1316	-100	610	620	REQDIIALQAR														Mascot
		1472.77	1472.65		-0.1154	-78	1110	1121	VQELEETAERLR														Mascot
		1587.85	1587.86		0.0159	10	537	550	AGIIQDTWQKATQK														Mascot
		1587.85	1587.86		0.0159	10	537	550	AGIIQDTWQKATQK														Mascot
		1625.86	1625.75		-0.1143	-70	790	803	ERTGHLESLQSQLK														Mascot
		2194.04	2194.08		0.0408	19	1262	1281	SAEDTAAMGDVVQLKEC								Carbamidomethyl (C)[17]						Mascot
									LEK
		2225.15	2225.09		-0.0576	-26	758	778	NNLQAQLEQAQKDAAAL														Mascot
									AEAK
		2225.15	2225.09		-0.0576	-26	758	778	NNLQAQLEQAQKDAAAL														Mascot
									AEAK
		2233.17	2233.06		-0.1113	-50	954	972	ISEKESLMTTLQQEVQQL														Mascot
									K
		2317.14	2317.14		0.0057	2	1164	1184	QALADTESQLNSAQKEA														Mascot
									QTQR
	6	PREDICTED: pericentrin [Danio rerio]						gi|326668478		491858	4.98		35		46		0
		Peptide Information
		Calc. Mass		Obsrv. Mass	± da	± ppm	Start	End	Sequence					Ion	C. I. %		Modification					Rank	Result Type
							Seq.	Seq.						Score
		836.382	836.327		-0.0545	-65	3557	3563	CSLEAEK								Carbamidomethyl (C)[1]						Mascot
		842.5	842.502		0.0026	3	15	21	AKLAHFR														Mascot
		850.409	850.533		0.1241	146	2129	2136	TPSSMTAR														Mascot
		850.409	850.533		0.1241	146	2129	2136	TPSSMTAR														Mascot
		853.39	853.355		-0.0351	-41	27	34	SESSSTQK														Mascot
		864.358	864.486		0.1276	148	1982	1988	EESDQEK														Mascot
		875.458	875.456		-0.0024	-3	2850	2857	SLGEERGK														Mascot
		882.516	882.556		0.0403	46	3606	3612	SEIHKLR														Mascot
		962.442	962.526		0.0832	86	1946	1953	ELEEEASR														Mascot
		987.511	987.524		0.0135	14	2715	2722	QAEIEELR				7		0								Mascot
		987.511	987.524		0.0135	14	2715	2722	QAEIEELR														Mascot
		1007.49	1007.47		-0.0223	-22	427	434	HLQEEHSK														Mascot
		1022.49	1022.5		0.0015	1	3557	3565	CSLEAEKSR														Mascot
		1045.49	1045.55		0.0624	60	1472	1480	QAEAEVNER														Mascot
		1100.57	1100.57		-0.0019	-2	1216	1224	VALQEQQER														Mascot
		1156.55	1156.6		0.0516	45	3752	3761	RQESASAHDR														Mascot
		1163.57	1163.6		0.0351	30	3404	3412	ELLCRMADR								Carbamidomethyl (C)[4]						Mascot
		1179.57	1179.59		0.0234	20	1115	1124	TSVEQLQSCK								Carbamidomethyl (C)[9]						Mascot
		1199.7	1199.56		-0.1425	-119	2856	2866	GKVAVLEQEVK														Mascot
		1235.74	1235.62		-0.117	-95	3888	3897	LLELELLHQK														Mascot
		1272.7	1272.7		-0.0043	-3	1342	1353	LVEGALEDSVLK														Mascot
		1294.65	1294.51		-0.1323	-102	4205	4216	MYTSPVLGAAER														Mascot
		1371.78	1371.62		-0.1636	-119	1989	2000	AVALEELEKTLR														Mascot
		1456.63	1456.66		0.0275	19	3995	4007	SSAVTEECMVSEK								Carbamidomethyl (C)[8]						Mascot
		1472.62	1472.65		0.0306	21	3995	4007	SSAVTEECMVSEK								Carbamidomethyl (C)[8], Oxidation (M)[9]						Mascot
		1475.73	1475.74		0.0083	6	2723	2734	SLVERLQCDQER														Mascot
		1587.76	1587.86		0.1	63	390	402	TKYEADISNYDLR														Mascot
		1587.8	1587.86		0.0602	38	1603	1616	SLECQESPQVVALK								Carbamidomethyl (C)[4]						Mascot
		1625.9	1625.75		-0.1547	-95	1954	1966	QRLHFLEEAELLK														Mascot
		1638.88	1638.84		-0.0415	-25	2528	2541	TVTQLEQELQKGHK														Mascot
		1815.96	1815.87		-0.0933	-51	358	372	VELNQEMVRLDNLVK								Oxidation (M)[7]						Mascot
		1993.99	1993.95		-0.0436	-22	3014	3031	ELHEQQEAAVAKQGEAQ														Mascot
									K
		2082.98	2082.99		0.0054	3	3995	4012	SSAVTEECMVSEKLAWQ								Carbamidomethyl (C)[8]						Mascot
									K
		2247.14	2247.08		-0.0615	-27	3304	3321	LELENTERLDAHFVEYLR														Mascot
		2284.1	2284.15		0.0491	21	3955	3974	ENSEFSECLAALSEEKISL								Carbamidomethyl (C)[8]						Mascot
									K
		2300.09	2300.16		0.063	27	3545	3563	LQQEQTQSHDLRCSLEA								Carbamidomethyl (C)[13]						Mascot
									EK
		2317.2	2317.14		-0.052	-22	849	868	LQALEDQVKSMENVLET														Mascot
									ELK
		2501.21	2501.23		0.0176	7	2956	2977	LEELEEHVQADMVNLSAL								Oxidation (M)[12]						Mascot
									ETSK
	7	transmembrane protein 200A [Danio rerio]						gi|113679869		54934.7	9.28		11		46		0
		Peptide Information
		Calc. Mass		Obsrv. Mass	± da	± ppm	Start	End	Sequence					Ion	C. I. %		Modification					Rank	Result Type
							Seq.	Seq.						Score
		970.532	970.495		-0.0361	-37	413	420	LTVQPEQR														Mascot
		1163.61	1163.6		-0.0057	-5	422	430	HPSWPRLDR														Mascot
		1371.6	1371.62		0.0223	16	353	366	SNSATESASSTSSR														Mascot
		1456.73	1456.66		-0.0684	-47	245	257	GGFCLLSPTYKDR														Mascot
		1587.92	1587.86		-0.0601	-38	1	16	MIATGGVITGLAALKR								Oxidation (M)[1]						Mascot
		1587.92	1587.86		-0.0601	-38	1	16	MIATGGVITGLAALKR								Oxidation (M)[1]						Mascot
		1874.75	1874.92		0.1742	93	181	197	CTNGACMGPYGGDTEIR								Carbamidomethyl (C)[1,6], Oxidation (M)[7]						Mascot
		2096.89	2097.11		0.2126	101	226	244	FSHRTSSADDDDGLMSE														Mascot
									AR
		2096.89	2097.11		0.2126	101	226	244	FSHRTSSADDDDGLMSE														Mascot
									AR
		2194.19	2194.08		-0.1125	-51	280	299	CQTRSIVSSSISAFTLPVI								Carbamidomethyl (C)[1]						Mascot
									K
		2259.94	2260.13		0.1844	82	178	197	EQKCTNGACMGPYGGD								Carbamidomethyl (C)[4,9], Oxidation (M)[10]						Mascot
									TEIR
		2284.1	2284.15		0.0552	24	17	37	QDSTRSQYHLSAQSPGP														Mascot
									APEK
		3337.82	3337.73		-0.0969	-29	57	87	LYSASGFFLVLGVLILMA														Mascot
									GIAMAVLGYWPHK
	8	PREDICTED: hypothetical protein LOC100537182						gi|326677217		4808.4	4.86		5		44		0
		[Danio rerio]
		Peptide Information
		Calc. Mass		Obsrv. Mass	± da	± ppm	Start	End	Sequence					Ion	C. I. %		Modification					Rank	Result Type
							Seq.	Seq.						Score
		853.391	853.355		-0.036	-42	11	17	VCKNMDK								Oxidation (M)[5]						Mascot
		856.561	856.517		-0.0447	-52	2	9	AAVLITLR														Mascot
		987.602	987.524		-0.0779	-79	1	9	MAAVLITLR														Mascot
		987.602	987.524		-0.0779	-79	1	9	MAAVLITLR														Mascot
		1100.47	1100.57		0.0999	91	14	21	NMDKYEER								Oxidation (M)[2]						Mascot
		2317.09	2317.14		0.0494	21	22	43	IWEELTGQAGDNELEGK														Mascot
									VQGSG
	9	novel protein similar to H.sapiens TTN, titin (TTN)						gi|169154823		842970	5.81		44		42		0
		[Danio rerio]
		Peptide Information
		Calc. Mass		Obsrv. Mass	± da	± ppm	Start	End	Sequence					Ion	C. I. %		Modification					Rank	Result Type
							Seq.	Seq.						Score
		842.444	842.502		0.0581	69	3102	3108	SYKVSMK														Mascot
		850.481	850.533		0.0514	60	1088	1094	LTSVRMK								Oxidation (M)[6]						Mascot
		850.481	850.533		0.0514	60	1088	1094	LTSVRMK								Oxidation (M)[6]						Mascot
		853.384	853.355		-0.0293	-34	1858	1863	WYQNDK														Mascot
		856.489	856.517		0.0281	33	6818	6824	LTLQEPR														Mascot
		870.42	870.532		0.1117	128	6420	6427	LSDSGTYK														Mascot
		882.468	882.556		0.0879	100	2483	2489	YKVSTER														Mascot
		970.579	970.495		-0.0837	-86	3602	3609	QQRALVQK														Mascot
		987.558	987.524		-0.0341	-35	4726	4734	VEVSNRVGK														Mascot
		987.558	987.524		-0.0341	-35	4726	4734	VEVSNRVGK														Mascot
		996.536	996.584		0.048	48	2586	2593	LTITETYR														Mascot
		996.536	996.584		0.048	48	2586	2593	LTITETYR														Mascot
		1007.5	1007.47		-0.0362	-36	3593	3601	ESPFVSDVK														Mascot
		1045.53	1045.55		0.0185	18	6656	6665	CQIGGTPEIK														Mascot
		1051.56	1051.7		0.143	136	6666	6674	ISWFKADGK														Mascot
		1051.56	1051.7		0.143	136	6666	6674	ISWFKADGK														Mascot
		1100.56	1100.57		0.0094	9	5147	5156	EPANITEQAK														Mascot
		1156.49	1156.6		0.1031	89	7094	7104	ATNEAGSEFCK														Mascot
		1163.54	1163.6		0.0576	50	5993	6002	MGEPLQLECK								Oxidation (M)[1]						Mascot
		1199.56	1199.56		-0.0045	-4	1404	1413	DESYEGMLKK														Mascot
		1205.65	1205.62		-0.0221	-18	4383	4392	ILWKQGMSSR														Mascot
		1235.62	1235.62		0.0027	2	790	800	RVQSTSPMSAR								Oxidation (M)[8]						Mascot
		1272.6	1272.7		0.1041	82	4882	4892	EMLTGGTCFIK								Carbamidomethyl (C)[8], Oxidation (M)[2]						Mascot
		1279.64	1279.76		0.1213	95	3711	3722	SETTTAVVSEQK														Mascot
		1312.63	1312.6		-0.0332	-25	4387	4398	QGMSSRLSCTVK								Oxidation (M)[3]						Mascot
		1371.62	1371.62		-0.0002	0	7094	7106	ATNEAGSEFCKSK														Mascot
		1412.76	1412.63		-0.13	-92	273	285	VSTARQQSPSPVR														Mascot
		1456.76	1456.66		-0.1048	-72	7158	7170	VGGDPIPNVKWMK								Oxidation (M)[12]						Mascot
		1472.61	1472.65		0.0404	27	5689	5701	YTCQAMNEAGQEK														Mascot
		1475.8	1475.74		-0.0686	-46	1964	1976	GKHYSLTIINAMK														Mascot
		1587.74	1587.86		0.1256	79	4879	4892	EDKEMLTGGTCFIK								Oxidation (M)[5]						Mascot
		1587.76	1587.86		0.1	63	5655	5667	DESWILEDPSIQR														Mascot
		1625.73	1625.75		0.0205	13	5508	5522	NEAGSESCSMDLRVK														Mascot
		1638.91	1638.84		-0.0666	-41	7253	7266	DIDIVELLRNVDPK														Mascot
		1815.82	1815.87		0.0509	28	5122	5138	HGGKYTCHAQNEAGSQ														Mascot
									K
		1993.94	1993.95		0.0143	7	4299	4315	LECQVDEDTGVSIIWMR														Mascot
		2097.05	2097.11		0.0517	25	6191	6208	GSQPMTVSWVQDKDHIL														Mascot
									R
		2097.05	2097.11		0.0517	25	6191	6208	GSQPMTVSWVQDKDHIL														Mascot
									R
		2194.11	2194.08		-0.0327	-15	742	761	LPVVLPEDEGIYTAFASN														Mascot
									MK
		2211.14	2211.08		-0.0637	-29	6494	6513	SCEIALRGDTAILELHNID														Mascot
									K
		2232.96	2233.06		0.1055	47	1132	1149	MINEFGYCSLDYEVAYSR								Carbamidomethyl (C)[8], Oxidation (M)[1]						Mascot
		2260.13	2260.13		-0.0007	0	5668	5688	TFENNVATLTIPVCESIHS														Mascot
									GK
		2283.1	2283.15		0.0496	22	2409	2430	NVHFGDVGDYKFVAGSA														Mascot
									ETAAK
		2283.19	2283.15		-0.0363	-16	3240	3260	EHPSQVMSALTESVTPLT								Oxidation (M)[7]						Mascot
									IVK
		2297.15	2297.16		0.0098	4	6550	6570	NLSVEMGKSLILECTYAG								Carbamidomethyl (C)[14]						Mascot
			2297.16																				Mascot
									SPK
		2317.15	2317.14		-0.0056	-2	5668	5688	TFENNVATLTIPVCESIHS								Carbamidomethyl (C)[14]						Mascot
									GK
		2472.1	2472.16		0.0593	24	4481	4502	GCTAHLECEMTGTAPFEI														Mascot
									TWFK
		2486.21	2486.2		-0.0122	-5	2501	2525	MSDAGEYSVVAGSSVSK														Mascot
									ANLTVEGK
		2501.18	2501.23		0.0498	20	463	486	DETMSEISSVSVDTGAPA								Oxidation (M)[4]						Mascot
									APFFVK
		3337.48	3337.73		0.2439	73	4346	4377	DTGTYTCTAANEAGSSS								Carbamidomethyl (C)[7,18]						Mascot
									CSSSVTVQEPPVFVK
	10	PREDICTED: transposon TX1 uncharacterized 149 kDa						gi|326678664		127486	9.2		18		41		0
		protein-like [Danio rerio]
		Peptide Information
		Calc. Mass		Obsrv. Mass	± da	± ppm	Start	End	Sequence					Ion	C. I. %		Modification					Rank	Result Type
							Seq.	Seq.						Score
		850.514	850.533		0.0183	22	117	123	GRILYTK														Mascot
		850.514	850.533		0.0183	22	117	123	GRILYTK														Mascot
		853.46	853.355		-0.1054	-123	388	394	AKFCSIK								Carbamidomethyl (C)[4]						Mascot
		875.467	875.456		-0.0112	-13	1	6	MYRLHR														Mascot
		996.656	996.584		-0.0724	-73	535	543	RAVLSLLPK														Mascot
		996.656	996.584		-0.0724	-73	535	543	RAVLSLLPK														Mascot
		1022.56	1022.5		-0.0679	-66	1050	1058	KANIFQSSK														Mascot
		1045.55	1045.55		-0.0006	-1	940	947	RTADLQWR														Mascot
		1100.62	1100.57		-0.0535	-49	200	208	KNGLVDIWR														Mascot
		1235.65	1235.62		-0.0265	-21	283	292	LLQDVLFCER														Mascot
		1312.69	1312.6		-0.088	-67	370	380	KAELGSFLYER														Mascot
		1638.89	1638.84		-0.0495	-30	914	926	ELLWTPTTYFLVR														Mascot
		1815.66	1815.87		0.2057	113	1062	1078	TEVDDGCSDDGMESGN								Carbamidomethyl (C)[7]						Mascot
									K
		1912.95	1912.96		0.0091	5	847	862	CIVLDPPEDIICEIQR								Carbamidomethyl (C)[1]						Mascot
		2097.03	2097.11		0.0783	37	476	493	DITFKELTEAMQQLSNGR								Oxidation (M)[11]						Mascot
		2097.03	2097.11		0.0783	37	476	493	DITFKELTEAMQQLSNGR								Oxidation (M)[11]						Mascot
		2260.21	2260.13		-0.081	-36	681	700	QGCPLSGQLYSLMIEPLL								Carbamidomethyl (C)[3]						Mascot
									LK
		2283.19	2283.15		-0.0378	-17	319	337	AQIRVFCQNYTLNSSLQI								Carbamidomethyl (C)[7]						Mascot
									K
		2283.19	2283.15		-0.0378	-17	319	337	AQIRVFCQNYTLNSSLQI								Carbamidomethyl (C)[7]						Mascot
									K
		2299.04	2299.16		0.1182	51	390	408	FCSIKDMDAPSSYFFNLE								Carbamidomethyl (C)[2]						Mascot
									K
		2472.37	2472.16		-0.209	-85	681	702	QGCPLSGQLYSLMIEPLL														Mascot
									LKLR
		2486.23	2486.2		-0.0393	-16	124	145	IEIEGFLFGFINVYAPNNG														Mascot
									SER
Gel Idx/Pos			180/H7						Instr./Gel Origin			BA2060/110707A							Process Status		Analysis Succeeded
Plate [#] Name			[1] 31496						Instrument Sample Name										Spectra		11
Rank		Protein Name						Accession No.		Protein MW	Protein		Pep.		Protein		Protein	Total Ion	Total Ion
											PI		Count		Score		Score	Score	C. I. %
																	C. I. %
	1	gelsolin b [Danio rerio]						gi|148230943		80133.8	5.62		16		469		100	398	100
		Peptide Information
		Calc. Mass		Obsrv. Mass	± da	± ppm	Start	End	Sequence					Ion	C. I. %		Modification					Rank	Result Type
							Seq.	Seq.						Score
		823.417	823.399		-0.0179	-22	517	524	ANPAGHTR														Mascot
		853.362	853.345		-0.0173	-20	179	184	CNQFER								Carbamidomethyl (C)[1]						Mascot
		875.466	875.447		-0.0193	-22	104	110	TFLGYFK														Mascot
		987.537	987.517		-0.0203	-21	13	20	QTGLQVWR				52		99.834								Mascot
		987.537	987.517		-0.0203	-21	13	20	QTGLQVWR														Mascot
		1007.48	1007.46		-0.0201	-20	676	684	YIESDPAGR														Mascot
		1022.51	1022.49		-0.0154	-15	2	9	VHHPEFEK														Mascot
		1294.53	1294.5		-0.0229	-18	193	202	DIRDNECCGR								Carbamidomethyl (C)[7,8]						Mascot
		1456.68	1456.65		-0.0296	-20	308	320	AAEDFISQMGYPK														Mascot
		1472.67	1472.64		-0.0277	-19	308	320	AAEDFISQMGYPK				44		98.921		Oxidation (M)[9]						Mascot
		1472.67	1472.64		-0.0277	-19	308	320	AAEDFISQMGYPK								Oxidation (M)[9]						Mascot
		1578.65	1578.8		0.1435	91	377	391	SEAMAAQHGMVDDGK								Oxidation (M)[4,10]						Mascot
		1625.75	1625.74		-0.0108	-7	203	216	AKLFVCEEGSENDK								Carbamidomethyl (C)[6]						Mascot
		1952.01	1951.98		-0.0349	-18	321	337	HTEVQIIPENGETPLFK														Mascot
		2097.13	2097.09		-0.0376	-18	451	472	GASAILAAQLDAELGGSA				210		100								Mascot
									VQVR
		2097.13	2097.09		-0.0376	-18	451	472	GASAILAAQLDAELGGSA														Mascot
									VQVR
		2121.14	2121.1		-0.0435	-21	217	236	ILAILGPKPDLPDAQSEDT														Mascot
									K
		2152.1	2152.06		-0.0358	-17	32	50	NLYGGFYTGDTYLVLNTI														Mascot
									K
		2152.1	2152.06		-0.0358	-17	32	50	NLYGGFYTGDTYLVLNTI				92		100								Mascot
									K
		2155.96	2155.92		-0.0367	-17	433	450	QGQIIYMWQGEESSQDE														Mascot
									K
		3387.67	3387.67		-0.0007	0	399	428	IEGSDKVPVDPSIYGQFY														Mascot
									GGDSYIILYTYK
	2	acylamino-acid-releasing enzyme [Danio rerio]						gi|38564417		81411.5	5.72		8		89		99.994	78	100
		Peptide Information
		Calc. Mass		Obsrv. Mass	± da	± ppm	Start	End	Sequence					Ion	C. I. %		Modification					Rank	Result Type
							Seq.	Seq.						Score
		1019.56	1019.52		-0.0321	-31	129	137	CLNLTTLNK														Mascot
		1047.53	1047.5		-0.0316	-30	107	115	ENTIKGEEK														Mascot
		1587.89	1587.85		-0.0314	-20	5	17	VLRDPVEISQLYR														Mascot
		1625.76	1625.74		-0.022	-14	74	88	SVVYSGPSGNCTEIR								Carbamidomethyl (C)[11]						Mascot
		1815.89	1815.85		-0.0362	-20	349	365	AGDDGFTGIYSFLLSPR														Mascot
		1865.85	1865.81		-0.0312	-17	38	52	YGGQYSNIYTEWTQR														Mascot
		1865.85	1865.81		-0.0312	-17	38	52	YGGQYSNIYTEWTQR				78		100								Mascot
		1961.99	1961.95		-0.0362	-18	312	328	IVYLESGVFGPHLQCSR								Carbamidomethyl (C)[15]						Mascot
		2306.06	2306.11		0.0542	24	710	730	ADAESDGFMNGALWMIQ														Mascot
									HLSL
	3	Acylpeptide hydrolase [Danio rerio]						gi|55777111		81351.5	5.66		6		82		99.975	78	100
		Peptide Information
		Calc. Mass		Obsrv. Mass	± da	± ppm	Start	End	Sequence					Ion	C. I. %		Modification					Rank	Result Type
							Seq.	Seq.						Score
		1019.56	1019.52		-0.0321	-31	129	137	CLNLTTLNK														Mascot
		1047.53	1047.5		-0.0316	-30	107	115	ENTIKGEEK														Mascot
		1587.89	1587.85		-0.0314	-20	5	17	VLRDPVEISQLYR														Mascot
		1625.76	1625.74		-0.022	-14	74	88	SVVYSGPSGNCTEIR								Carbamidomethyl (C)[11]						Mascot
		1865.85	1865.81		-0.0312	-17	38	52	YGGQYSNIYTEWTQR														Mascot
		1865.85	1865.81		-0.0312	-17	38	52	YGGQYSNIYTEWTQR				78		100								Mascot
		1961.99	1961.95		-0.0362	-18	312	328	IVYLESGVFGPHLQCSR								Carbamidomethyl (C)[15]						Mascot
	4	PREDICTED: serine/arginine repetitive matrix protein 4						gi|189518857		64253.1	11.33		13		53		76.646
		[Danio rerio]
		Peptide Information
		Calc. Mass		Obsrv. Mass	± da	± ppm	Start	End	Sequence					Ion	C. I. %		Modification					Rank	Result Type
							Seq.	Seq.						Score
		875.458	875.447		-0.0112	-13	336	343	LKGEESGR														Mascot
		970.372	970.491		0.1194	123	177	184	SSSCMENR								Carbamidomethyl (C)[4]						Mascot
		996.584	996.576		-0.0073	-7	59	67	RLETPVGPK														Mascot
		996.584	996.576		-0.0073	-7	59	67	RLETPVGPK														Mascot
		1007.52	1007.46		-0.0637	-63	377	385	SRSISSQSR														Mascot
		1047.43	1047.5		0.0654	62	443	450	YCSSCKSR								Carbamidomethyl (C)[2,5]						Mascot
		1279.86	1279.75		-0.1067	-83	8	19	LLAGILARLLAR														Mascot
		1456.72	1456.65		-0.0685	-47	60	72	LETPVGPKDDEEK														Mascot
		1467.67	1467.73		0.0536	37	524	535	SRSHSHTYSSYR														Mascot
		1662.93	1662.79		-0.1465	-88	498	511	SSSILSWRLFPLTR														Mascot
		2071.9	2072.03		0.1284	62	218	235	ISSKCCCHFSESTVSPSR								Carbamidomethyl (C)[5,6]						Mascot
		2119.09	2119.08		-0.0119	-6	236	256	SGVEGLSKVVIVQNSESS														Mascot
									DGK
		2155.97	2155.92		-0.0506	-23	259	279	ADYDSGNDTSSPPSSKT														Mascot
									GITR
		2300.01	2300.14		0.1299	56	222	243	CCCHFSESTVSPSRSGV														Mascot
									EGLSK
	5	PREDICTED: zinc finger protein 420 isoform 2 [Danio						gi|326678086		70371	9.08		16		50		50.069
		rerio]
		Peptide Information
		Calc. Mass		Obsrv. Mass	± da	± ppm	Start	End	Sequence					Ion	C. I. %		Modification					Rank	Result Type
							Seq.	Seq.						Score
		842.521	842.494		-0.0263	-31	25	31	QRQGLLK														Mascot
		864.48	864.47		-0.0096	-11	591	597	HRSVHTK														Mascot
		987.562	987.517		-0.0454	-46	497	505	TFITAGHLK														Mascot
		987.562	987.517		-0.0454	-46	497	505	TFITAGHLK														Mascot
		1007.39	1007.46		0.0671	67	36	43	MSDPEPCR								Carbamidomethyl (C)[7], Oxidation (M)[1]						Mascot
		1019.44	1019.52		0.0836	82	572	580	THKCDQCGK														Mascot
		1045.54	1045.55		0.0097	9	134	141	FHCARNLK								Carbamidomethyl (C)[3]						Mascot
		1062.51	1062.67		0.1591	150	110	117	YNLNVHMR								Oxidation (M)[7]						Mascot
		1578.76	1578.8		0.039	25	46	58	QEETEELIDVMVK								Oxidation (M)[11]						Mascot
		1625.84	1625.74		-0.106	-65	593	606	SVHTKEKPPSCSLR								Carbamidomethyl (C)[11]						Mascot
		1662.74	1662.79		0.0498	30	258	272	THTGEKPYTCTHCGK														Mascot
		1961.9	1961.95		0.0583	30	454	469	VHTNEKPYSCPECGKR								Carbamidomethyl (C)[10,13]						Mascot
		2119	2119.08		0.0799	38	538	555	VHTGEKPFACTHCGKSF								Carbamidomethyl (C)[10,13]						Mascot
									R
		2211.08	2211.07		-0.0139	-6	450	468	IHLRVHTNEKPYSCPECG														Mascot
									K
		2230.06	2230.14		0.0809	36	276	294	CSSHLNEHMIIHTGEKTH														Mascot
									R
		2283.06	2283.14		0.0864	38	227	245	HQMIHTGEKPYKCSHCD														Mascot
									LR
		2283.06	2283.14		0.0864	38	227	245	HQMIHTGEKPYKCSHCD														Mascot
									LR
		2298.09	2298.15		0.0547	24	478	496	LHQHVHTGVREFVCFEC														Mascot
									EK
	6	mitochondrial import inner membrane translocase						gi|41152151		12425.5	10.16		6		43		0
		subunit TIM14 [Danio rerio]
		Peptide Information
		Calc. Mass		Obsrv. Mass	± da	± ppm	Start	End	Sequence					Ion	C. I. %		Modification					Rank	Result Type
							Seq.	Seq.						Score
		987.547	987.517		-0.0302	-31	107	115	DLLDGQAKK														Mascot
		987.547	987.517		-0.0302	-31	107	115	DLLDGQAKK														Mascot
		1007.46	1007.46		0.0011	1	42	50	SAFGSGYYR														Mascot
		1399.78	1399.68		-0.0967	-69	61	74	EASLILGVSPTANK														Mascot
		1925	1924.95		-0.0497	-26	1	20	MASTMVAVGLTLAAAGF														Mascot
									TGR
		1953.04	1952.97		-0.0666	-34	84	101	LMILNHPDRGGSPYLAAK														Mascot
		2283.23	2283.14		-0.0835	-37	2	24	ASTMVAVGLTLAAAGFT														Mascot
									GRYAVR
		2283.23	2283.14		-0.0835	-37	2	24	ASTMVAVGLTLAAAGFT														Mascot
									GRYAVR
	7	novel protein [Danio rerio]						gi|94733366		36191.6	9.32		11		42		0
		Peptide Information
		Calc. Mass		Obsrv. Mass	± da	± ppm	Start	End	Sequence					Ion	C. I. %		Modification					Rank	Result Type
							Seq.	Seq.						Score
		864.48	864.47		-0.0096	-11	292	298	HRSVHTK														Mascot
		987.562	987.517		-0.0454	-46	198	206	TFITAGHLK														Mascot
		987.562	987.517		-0.0454	-46	198	206	TFITAGHLK														Mascot
		1007.39	1007.46		0.0671	67	19	26	MSDPEPCR								Carbamidomethyl (C)[7], Oxidation (M)[1]						Mascot
		1019.44	1019.52		0.0836	82	273	281	THKCDQCGK														Mascot
		1047.57	1047.5		-0.0681	-65	10	18	QSLLKDSEK														Mascot
		1625.84	1625.74		-0.106	-65	294	307	SVHTKEKPPSCSLR								Carbamidomethyl (C)[11]						Mascot
		1961.9	1961.95		0.0583	30	155	170	VHTNEKPYSCPECGKR								Carbamidomethyl (C)[10,13]						Mascot
		2071.96	2072.03		0.0727	35	77	94	CFTCTLCGKGFSYNRPF														Mascot
									K
		2119	2119.08		0.0799	38	239	256	VHTGEKPFACTHCGKSF								Carbamidomethyl (C)[10,13]						Mascot
									R
		2211.08	2211.07		-0.0139	-6	151	169	IHLRVHTNEKPYSCPECG														Mascot
									K
		2298.09	2298.15		0.0547	24	179	197	LHQHVHTGVREFVCFEC														Mascot
									EK
	8	RecName: Full=Serine/arginine repetitive matrix protein						gi|281312156		65482.9	11.48		11		41		0
		4; AltName: Full=Neural-specific serine/arg
		Peptide Information
		Calc. Mass		Obsrv. Mass	± da	± ppm	Start	End	Sequence					Ion	C. I. %		Modification					Rank	Result Type
							Seq.	Seq.						Score
		875.458	875.447		-0.0112	-13	347	354	LKGEESGR														Mascot
		970.372	970.491		0.1194	123	188	195	SSSCMENR								Carbamidomethyl (C)[4]						Mascot
		1007.52	1007.46		-0.0637	-63	388	396	SRSISSQSR														Mascot
		1047.43	1047.5		0.0654	62	454	461	YCSSCKSR								Carbamidomethyl (C)[2,5]						Mascot
		1456.72	1456.65		-0.0685	-47	45	57	LETPVGPKDDEEK														Mascot
		1467.67	1467.73		0.0536	37	535	546	SRSHSHTYSSYR														Mascot
		1662.93	1662.79		-0.1465	-88	509	522	SSSILSWRLFPLTR														Mascot
		2071.9	2072.03		0.1284	62	229	246	ISSKCCCHFSESTVSPSR								Carbamidomethyl (C)[5,6]						Mascot
		2119.09	2119.08		-0.0119	-6	247	267	SGVEGLSKVVIVQNSESS														Mascot
									DGK
		2155.97	2155.92		-0.0506	-23	270	290	ADYDSGNDTSSPPSSKT														Mascot
									GITR
		2300.01	2300.14		0.1299	56	233	254	CCCHFSESTVSPSRSGV														Mascot
									EGLSK
	9	PREDICTED: clathrin light chain B-like isoform 2 [Danio						gi|326673837		23720.3	4.55		7		40		0
		rerio]
		Peptide Information
		Calc. Mass		Obsrv. Mass	± da	± ppm	Start	End	Sequence					Ion	C. I. %		Modification					Rank	Result Type
							Seq.	Seq.						Score
		836.397	836.321		-0.0761	-91	182	188	LCDFNPK														Mascot
		875.437	875.447		0.0098	11	108	113	WREEQK														Mascot
		1062.63	1062.67		0.04	38	199	207	MRSVLISLK								Oxidation (M)[1]						Mascot
		1467.93	1467.73		-0.1998	-136	201	213	SVLISLKQTPLLR														Mascot
		1952.88	1952.97		0.0902	46	137	151	ELEDWHIHQTEQMEK														Mascot
		2096.97	2097.09		0.1216	58	136	151	KELEDWHIHQTEQMEK								Oxidation (M)[14]						Mascot
		2096.97	2097.09		0.1216	58	136	151	KELEDWHIHQTEQMEK								Oxidation (M)[14]						Mascot
		2211.01	2211.07		0.0525	24	137	153	ELEDWHIHQTEQMEKNK								Oxidation (M)[13]						Mascot
	10	PREDICTED: phenylserine dehydratase-like [Danio						gi|326673212		49208.8	7.51		11		40		0
		rerio]
		Peptide Information
		Calc. Mass		Obsrv. Mass	± da	± ppm	Start	End	Sequence					Ion	C. I. %		Modification					Rank	Result Type
							Seq.	Seq.						Score
		1092.67	1092.55		-0.1199	-110	185	194	GVLYLLSSLK														Mascot
		1456.66	1456.65		-0.011	-8	81	93	DFGAEEYLNGDVK														Mascot
		1472.78	1472.64		-0.1368	-93	160	171	LSKQYGMEIYLK														Mascot
		1472.78	1472.64		-0.1368	-93	160	171	LSKQYGMEIYLK														Mascot
		1578.76	1578.8		0.0336	21	418	431	FTVQLADWPGDMAK														Mascot
		1796.9	1796.67		-0.2249	-125	145	159	LQQSSLQKTPCTYSR								Carbamidomethyl (C)[11]						Mascot
		1952.94	1952.97		0.0352	18	415	431	VCRFTVQLADWPGDMAK								Oxidation (M)[15]						Mascot
		2104.16	2103.95		-0.2092	-99	300	322	LDAVVVPAGGHCGLLAG														Mascot
									TAAAIK
		2193.88	2194.05		0.1653	75	22	39	GFSDCEEYDPFWQSAEQ														Mascot
									R
		2230.03	2230.14		0.1082	49	268	287	ENGYLCLEEDDSAVYLA														Mascot
									GLR
		2284.08	2284.14		0.0591	26	243	263	DYGAMVISYGSTARDSIN														Mascot
									HAR
		2298.16	2298.15		-0.0173	-8	124	144	SSTPPAPEHLRFQDISAA														Mascot
			2298.15																				Mascot
									AFR
		2300.07	2300.14		0.0681	30	243	263	DYGAMVISYGSTARDSIN								Oxidation (M)[5]						Mascot
									HAR
Gel Idx/Pos			181/H8						Instr./Gel Origin			BA2060/110707A							Process Status		Analysis Succeeded
Plate [#] Name			[1] 31496						Instrument Sample Name										Spectra		11
Rank		Protein Name						Accession No.		Protein MW	Protein		Pep.		Protein		Protein	Total Ion	Total Ion
											PI		Count		Score		Score	Score	C. I. %
																	C. I. %
	1	villin 2 [Danio rerio]						gi|71892458		68683.2	5.7		12		196		100	164	100
		Peptide Information
		Calc. Mass		Obsrv. Mass	± da	± ppm	Start	End	Sequence					Ion	C. I. %		Modification					Rank	Result Type
							Seq.	Seq.						Score
		1104.58	1104.55		-0.029	-26	238	246	IGFPWSEIR														Mascot
		1104.58	1104.55		-0.029	-26	238	246	IGFPWSEIR				57		99.938								Mascot
		1120.56	1120.54		-0.026	-23	575	583	QRIDEFEAL														Mascot
		1182.59	1182.57		-0.0271	-23	264	273	APDFVFYAPR				66		99.993								Mascot
		1182.59	1182.57		-0.0271	-23	264	273	APDFVFYAPR														Mascot
		1233.61	1233.59		-0.0269	-22	172	180	IQVWHEEHR														Mascot
		1233.61	1233.59		-0.0269	-22	172	180	IQVWHEEHR				42		98.074								Mascot
		1310.69	1310.66		-0.0333	-25	263	273	KAPDFVFYAPR														Mascot
		1391.66	1391.71		0.0508	37	317	327	QMERAQLENEK								Oxidation (M)[2]						Mascot
		1413.81	1413.77		-0.0378	-27	527	539	QLLALTSELAQAR														Mascot
		1457.75	1457.72		-0.0322	-22	140	151	ELHRPGYLTSER														Mascot
		1531.75	1531.71		-0.0388	-25	360	371	KVENELQEQMQR														Mascot
		1616.74	1616.7		-0.0409	-25	346	357	ELMMQLYQFEER														Mascot
		1632.74	1632.7		-0.0421	-26	346	357	ELMMQLYQFEER								Oxidation (M)[3]						Mascot
		1648.73	1648.7		-0.0382	-23	346	357	ELMMQLYQFEER								Oxidation (M)[3,4]						Mascot
		1651.82	1651.77		-0.0491	-30	413	427	SQEQLAAELAEYTAK														Mascot
		2207.12	2207.04		-0.0822	-37	82	100	AKFFPEDVADELIQDITQK														Mascot
	2	Ezr protein [Danio rerio]						gi|50418501		40608.3	9.33		7		182		100	164	100
		Peptide Information
		Calc. Mass		Obsrv. Mass	± da	± ppm	Start	End	Sequence					Ion	C. I. %		Modification					Rank	Result Type
							Seq.	Seq.						Score
		1104.58	1104.55		-0.029	-26	238	246	IGFPWSEIR														Mascot
		1104.58	1104.55		-0.029	-26	238	246	IGFPWSEIR				57		99.938								Mascot
		1182.59	1182.57		-0.0271	-23	264	273	APDFVFYAPR				66		99.993								Mascot
		1182.59	1182.57		-0.0271	-23	264	273	APDFVFYAPR														Mascot
		1233.61	1233.59		-0.0269	-22	172	180	IQVWHEEHR														Mascot
		1233.61	1233.59		-0.0269	-22	172	180	IQVWHEEHR				42		98.074								Mascot
		1310.69	1310.66		-0.0333	-25	263	273	KAPDFVFYAPR														Mascot
		1391.66	1391.71		0.0508	37	317	327	QMERAQLENEK								Oxidation (M)[2]						Mascot
		1457.75	1457.72		-0.0322	-22	140	151	ELHRPGYLTSER														Mascot
		2207.12	2207.04		-0.0822	-37	82	100	AKFFPEDVADELIQDITQK														Mascot
	3	Si:dkey-276i5.1 protein [Danio rerio]						gi|66910298		86251.9	6.8		14		102		100	55	99.916
		Peptide Information
		Calc. Mass		Obsrv. Mass	± da	± ppm	Start	End	Sequence					Ion	C. I. %		Modification					Rank	Result Type
							Seq.	Seq.						Score
		1042.58	1042.56		-0.0222	-21	184	191	NNILQVWR														Mascot
		1104.62	1104.55		-0.0614	-56	335	343	RLLEFNQGK														Mascot
		1104.62	1104.55		-0.0614	-56	335	343	RLLEFNQGK														Mascot
		1277.63	1277.65		0.0271	21	405	416	AQTSGQSAQIMR														Mascot
		1391.74	1391.71		-0.0339	-24	344	356	LPFAAAQIGNSFR														Mascot
		1443.71	1443.68		-0.0318	-22	609	619	IMYSIFEHTFR														Mascot
		1626.76	1626.72		-0.0426	-26	476	489	TSYGWIEIVGCADR								Carbamidomethyl (C)[11]						Mascot
		1638.86	1638.81		-0.0438	-27	15	29	SMLSLCSATSALLLR								Carbamidomethyl (C)[6], Oxidation (M)[2]						Mascot
		1638.86	1638.81		-0.0438	-27	15	29	SMLSLCSATSALLLR								Carbamidomethyl (C)[6], Oxidation (M)[2]						Mascot
		1718.83	1718.83		0.0018	1	390	404	FSNVADLDIMLYSSK								Oxidation (M)[10]						Mascot
		1755.91	1755.93		0.0226	13	108	124	AENAPDVDVSKAVAELK														Mascot
		2192.17	2192.12		-0.0527	-24	589	608	TLHVEEVVPNVIEPSFGIG				55		99.916								Mascot
									R
		2192.17	2192.12		-0.0527	-24	589	608	TLHVEEVVPNVIEPSFGIG														Mascot
									R
		2207.04	2207.04		-0.0029	-1	368	385	VREFTMAEIEHFVDPNEK								Oxidation (M)[6]						Mascot
		2221.16	2221.1		-0.0581	-26	417	437	LGDAVEQGVINNSVLGYF														Mascot
									IGR
		2230.12	2230.11		-0.0134	-6	386	404	VHFKFSNVADLDIMLYSS								Oxidation (M)[14]						Mascot
									K
		2299	2299.13		0.1328	58	539	557	FAMEYLAICDECYITEQE														Mascot
									K
	4	PREDICTED: glycyl-tRNA synthetase [Danio rerio]						gi|189536638		86255.8	6.76		13		96		99.999	55	99.916
		Peptide Information
		Calc. Mass		Obsrv. Mass	± da	± ppm	Start	End	Sequence					Ion	C. I. %		Modification					Rank	Result Type
							Seq.	Seq.						Score
		1042.58	1042.56		-0.0222	-21	184	191	NNILQVWR														Mascot
		1104.62	1104.55		-0.0614	-56	335	343	RLLEFNQGK														Mascot
		1104.62	1104.55		-0.0614	-56	335	343	RLLEFNQGK														Mascot
		1277.63	1277.65		0.0271	21	405	416	AQTSGQSAQIMR														Mascot
		1391.74	1391.71		-0.0339	-24	344	356	LPFAAAQIGNSFR														Mascot
		1443.71	1443.68		-0.0318	-22	609	619	IMYSIFEHTFR														Mascot
		1626.76	1626.72		-0.0426	-26	476	489	TSYGWIEIVGCADR								Carbamidomethyl (C)[11]						Mascot
		1718.83	1718.83		0.0018	1	390	404	FSNVADLDIMLYSSK								Oxidation (M)[10]						Mascot
		1755.91	1755.93		0.0226	13	108	124	AENAPDVDVSKAVAELK														Mascot
		2192.17	2192.12		-0.0527	-24	589	608	TLHVEEVVPNVIEPSFGIG				55		99.916								Mascot
									R
		2192.17	2192.12		-0.0527	-24	589	608	TLHVEEVVPNVIEPSFGIG														Mascot
									R
		2207.04	2207.04		-0.0029	-1	368	385	VREFTMAEIEHFVDPNEK								Oxidation (M)[6]						Mascot
		2221.16	2221.1		-0.0581	-26	417	437	LGDAVEQGVINNSVLGYF														Mascot
									IGR
		2230.12	2230.11		-0.0134	-6	386	404	VHFKFSNVADLDIMLYSS								Oxidation (M)[14]						Mascot
									K
		2299	2299.13		0.1328	58	539	557	FAMEYLAICDECYITEQE														Mascot
									K
	5	ezrin like [Danio rerio]						gi|66472810		70053.6	5.42		7		68		99.357	57	99.938
		Peptide Information
		Calc. Mass		Obsrv. Mass	± da	± ppm	Start	End	Sequence					Ion	C. I. %		Modification					Rank	Result Type
							Seq.	Seq.						Score
		850.42	850.524		0.1038	122	582	588	MGNTKQR								Oxidation (M)[1]						Mascot
		850.42	850.524		0.1038	122	582	588	MGNTKQR								Oxidation (M)[1]						Mascot
		864.498	864.472		-0.026	-30	54	60	GFLTWLK														Mascot
		1104.58	1104.55		-0.029	-26	238	246	IGFPWSEIR														Mascot
		1104.58	1104.55		-0.029	-26	238	246	IGFPWSEIR				57		99.938								Mascot
		1120.56	1120.54		-0.026	-23	587	595	QRIDEFEAL														Mascot
		1391.66	1391.71		0.0508	37	317	327	QMERAQLENEK								Oxidation (M)[2]						Mascot
		1463.68	1463.72		0.0375	26	401	412	EELARQAEDQMK								Oxidation (M)[11]						Mascot
		1651.82	1651.77		-0.0491	-30	413	427	TQEQLAADLAEYTAK														Mascot
	6	Ezrl protein [Danio rerio]						gi|157422742		52248.2	7.62		6		66		98.908	57	99.938
		Peptide Information
		Calc. Mass		Obsrv. Mass	± da	± ppm	Start	End	Sequence					Ion	C. I. %		Modification					Rank	Result Type
							Seq.	Seq.						Score
		864.498	864.472		-0.026	-30	54	60	GFLTWLK														Mascot
		1042.63	1042.56		-0.0685	-66	428	436	LALLEEARK														Mascot
		1104.58	1104.55		-0.029	-26	238	246	IGFPWSEIR														Mascot
		1104.58	1104.55		-0.029	-26	238	246	IGFPWSEIR				57		99.938								Mascot
		1391.66	1391.71		0.0508	37	317	327	QMERAQLENEK								Oxidation (M)[2]						Mascot
		1463.68	1463.72		0.0375	26	401	412	EELARQAEDQMK								Oxidation (M)[11]						Mascot
		1651.82	1651.77		-0.0491	-30	413	427	TQEQLAADLAEYTAK														Mascot
	7	moesin [Danio rerio]						gi|51972166		67990.8	5.84		3		63		97.665	57	99.938
		Peptide Information
		Calc. Mass		Obsrv. Mass	± da	± ppm	Start	End	Sequence					Ion	C. I. %		Modification					Rank	Result Type
							Seq.	Seq.						Score
		1104.58	1104.55		-0.029	-26	238	246	IGFPWSEIR														Mascot
		1104.58	1104.55		-0.029	-26	238	246	IGFPWSEIR				57		99.938								Mascot
		1179.56	1179.58		0.0205	17	449	458	ATMVQEDLEK								Oxidation (M)[3]						Mascot
		1277.62	1277.65		0.0384	30	318	327	MERALLEDER								Oxidation (M)[1]						Mascot
	8	PREDICTED: moesin [Danio rerio]						gi|326673460		67949.1	6.64		3		63		97.61	57	99.938
		Peptide Information
		Calc. Mass		Obsrv. Mass	± da	± ppm	Start	End	Sequence					Ion	C. I. %		Modification					Rank	Result Type
							Seq.	Seq.						Score
		1104.58	1104.55		-0.029	-26	236	244	IGFPWSEIR														Mascot
		1104.58	1104.55		-0.029	-26	236	244	IGFPWSEIR				57		99.938								Mascot
		1391.75	1391.71		-0.0359	-26	447	458	AIMVEVDLEKTK								Oxidation (M)[3]						Mascot
		1718.86	1718.83		-0.0232	-13	522	537	LQALSSELADARDDSK														Mascot
	9	Ezrl protein [Danio rerio]						gi|32450442		39229.6	9.18		2		62		97.439	57	99.938
		Peptide Information
		Calc. Mass		Obsrv. Mass	± da	± ppm	Start	End	Sequence					Ion	C. I. %		Modification					Rank	Result Type
							Seq.	Seq.						Score
		864.498	864.472		-0.026	-30	54	60	GFLTWLK														Mascot
		1104.58	1104.55		-0.029	-26	238	246	IGFPWSEIR														Mascot
		1104.58	1104.55		-0.029	-26	238	246	IGFPWSEIR				57		99.938								Mascot
	10	Rdx protein [Danio rerio]						gi|29436484		52007.1	8.41		2		56		90.037	57	99.938
		Peptide Information
		Calc. Mass		Obsrv. Mass	± da	± ppm	Start	End	Sequence					Ion	C. I. %		Modification					Rank	Result Type
							Seq.	Seq.						Score
		1104.58	1104.55		-0.029	-26	238	246	IGFPWSEIR														Mascot
		1104.58	1104.55		-0.029	-26	238	246	IGFPWSEIR				57		99.938								Mascot
		1277.62	1277.65		0.0384	30	318	327	MERALLEDER								Oxidation (M)[1]						Mascot
Gel Idx/Pos			182/H9						Instr./Gel Origin			BA2060/110707A							Process Status		Analysis Succeeded
Plate [#] Name			[1] 31496						Instrument Sample Name										Spectra		11
Rank		Protein Name						Accession No.		Protein MW	Protein		Pep.		Protein		Protein	Total Ion	Total Ion
											PI		Count		Score		Score	Score	C. I. %
																	C. I. %
	1	protein disulfide-isomerase A4 [Danio rerio]						gi|41054259		72669.4	4.99		24		603		100	441	100
		Peptide Information
		Calc. Mass		Obsrv. Mass	± da	± ppm	Start	End	Sequence					Ion	C. I. %		Modification					Rank	Result Type
							Seq.	Seq.						Score
		829.428	829.508		0.0805	97	500	506	SFVMAFK														Mascot
		882.577	882.547		-0.0304	-34	525	533	GPVKVVVGK														Mascot
		885.515	885.494		-0.0211	-24	295	301	QVQELLR														Mascot
		907.478	907.456		-0.0222	-24	429	435	VATQFWR				49		99.638								Mascot
		907.478	907.456		-0.0222	-24	429	435	VATQFWR														Mascot
		939.432	939.415		-0.0169	-18	263	270	AFDYNGPR														Mascot
		939.432	939.415		-0.0169	-18	263	270	AFDYNGPR				49		99.691								Mascot
		940.485	940.404		-0.0802	-85	156	163	SEHAIVER														Mascot
		1011.48	1011.45		-0.0241	-24	96	103	QFAPEYEK														Mascot
		1041.63	1041.61		-0.0238	-23	392	400	HILPLVGHR														Mascot
		1068.57	1068.54		-0.0283	-26	247	256	FGVSGYPTLK														Mascot
		1140.59	1140.57		-0.0281	-25	132	141	FEVSGYPTIK														Mascot
		1248.61	1248.58		-0.0309	-25	235	246	VDATAESDLATR														Mascot
		1470.67	1470.64		-0.038	-26	378	390	DSTPASEVQDFFK														Mascot
[truncated: 21,187 more rows]
[truncated: 2 more columns]

## Sheet: Protein ID Summary
	Project Code: NGSE110704
				NCBI
	Spot number	MALDI well number	Match Quality		Accession No.	Protein MW	Protein PI	Pep.Count	Protein Score	Protein Score C. I. %	Total Ion Score	Total Ion C. I. %	Comments
	1	H1		pyruvate carboxylase, mitochondrial [Danio rerio]	gi|18858695	129802	6.44	21	295	100	219	100
	2	H2		novel protein similar to H.sapiens NCL, nucleolin (NCL, zgc:152810) [Danio rerio]	gi|220672795	74887.4	4.62	19	557	100	459	100	see detail hits#3. #3 could be the right one!!
	3	H3		liver glycogen phosphorylase [Danio rerio]	gi|56606106	111467	5.5	33	1050	100	796	100
	4	H4		Methylenetetrahydrofolate dehydrogenase (NADP+ dependent) [Danio rerio]	gi|49902652	100428	7.28	13	403	100	364	100
	5	H5		transitional endoplasmic reticulum ATPase [Danio rerio]	gi|41393119	89367.7	5.14	34	1310	100	1047	100
	6	H6		gelsolin b [Danio rerio]	gi|148230943	80133.8	5.62	12	257	100	217	100	see other possibility #2,3
	7	H7		gelsolin b [Danio rerio]	gi|148230943	80133.8	5.62	16	469	100	398	100
	8	H8		villin 2 [Danio rerio]	gi|71892458	68683.2	5.7	12	196	100	164	100	see other possibility #3,4
	9	H9		protein disulfide-isomerase A4 [Danio rerio]	gi|41054259	72669.4	4.99	24	603	100	441	100
	10	H10		thimet oligopeptidase [Danio rerio]	gi|50539778	77928.1	5.51	28	1100	100	909	100
	11	H11		succinate dehydrogenase [ubiquinone] flavoprotein subunit, mitochondrial precursor [Danio rerio]	gi|41053873	72014.6	6.2	20	1190	100	1070	100
	12	H12		hypothetical protein LOC792190 [Danio rerio]	gi|224495957	78018.4	6.21	20	962	100	845	100
	13	H13		hypothetical protein LOC559969 [Danio rerio]	gi|113678532	77970.3	6.17	12	419	100	375	100
	14	H14		transferrin-a [Danio rerio]	gi|220672954	73234.7	6.61	17	166	100	103	100
	15	H15		bifunctional purine biosynthesis protein PURH [Danio rerio]	gi|195539484	64003.9	6.31	22	1170	100	1019	100
	16	H16		leukotriene A-4 hydrolase [Danio rerio]	gi|47086915	69145	6.17	11	443	100	402	100	see detail hit#2
	17	H17		Tkt protein [Danio rerio]	gi|182890016	67962.5	6.79	22	1360	100	1212	100
	18	H18		Tkt protein [Danio rerio]	gi|182890016	67962.5	6.79	25	1310	100	1117	100
	19	H19		transketolase-like protein 2 [Danio rerio]	gi|186288308	67795.3	6.81	21	1350	100	1208	100
	20	H20		vitellogenin 1 [Danio rerio]	gi|94733730	149140	8.74	30	982	100	818	100
	21	H21		Krt4 protein [Danio rerio]	gi|161612220	53979.9	5.34	22	897	100	745	100
	22	H22		aldehyde dehydrogenase 2b [Danio rerio]	gi|51571951	56513.4	6.06	24	706	100	520	100
	23	H23		alpha-aminoadipic semialdehyde dehydrogenase [Danio rerio]	gi|47086597	55568.2	5.94	18	443	100	328	100
	24	H24		glucose phosphate isomerase a [Danio rerio]	gi|21426835	62045.2	6.45	7	174	100	154	100
	25	I1		Krt4 protein [Danio rerio]	gi|44890667	53993.9	5.34	26	980	100	767	100
	26	I2		keratin 8 [Danio rerio]	gi|29335502	55516.4	5.01	20	645	100	527	100
	27	I3		type I cytokeratin, enveloping layer [Danio rerio]	gi|18858519	46655.7	5.13	25	659	100	424	100
	28	I4		type I cytokeratin, enveloping layer [Danio rerio]	gi|18858519	46655.7	5.13	22	379	100	198	100
	29	I5		hypothetical protein LOC100034647 [Danio rerio]	gi|131888757	46317.3	5.36	25	783	100	547	100	see detail hits
	30	I6		hypothetical protein LOC100034647 [Danio rerio]	gi|131888757	46317.3	5.36	15	406	100	313	100
	31	I7		Krt4 protein [Danio rerio]	gi|161612220	53979.9	5.34	25	960	100	767	100
	32	I8		Type I cytokeratin, enveloping layer [Danio rerio]	gi|41388915	46524.6	5.13	25	667	100	430	100
	33	I9		Sjogren syndrome antigen B (autoantigen La) [Danio rerio]	gi|41054695	46109.5	6.68	20	522	100	392	100
	34	I10		Sjogren syndrome antigen B (autoantigen La) [Danio rerio]	gi|41054695	46109.5	6.68	20	598	100	461	100
	35	I11		sarcolemma associated protein b [Danio rerio]	gi|41055754	43615.1	5.82	17	732	100	635	100
	36	I12		Urod protein [Danio rerio]	gi|62204806	45232.9	6.17	14	380	100	301	100	see detail hits
	37	I13		Isocitrate dehydrogenase 3 (NAD+) alpha [Danio rerio]	gi|29124437	39960.3	7.04	19	934	100	797	100
	38	I14		hypothetical protein LOC564979 [Danio rerio]	gi|157311713	38002.1	6.31	10	235	100	184	100	see detail hit#6: cathepsin L, 1 b
	39	I15		multifunctional protein ADE2 [Danio rerio]	gi|41053415	47046.8	6.99	17	415	100	323	100
	40	I16		phosphoglycerate kinase 1 [Danio rerio]	gi|47087077	44661.9	6.47	18	912	100	795	100
	41	I17		3-ketoacyl-CoA thiolase, mitochondrial [Danio rerio]	gi|47085765	41760.7	7.64	15	666	100	562	100	see detail hits
	42	I18		eukaryotic translation elongation factor 2b [Danio rerio]	gi|41386743	95436.8	6.28	13	293	100	260	100
	43	I19		glycerol-3-phosphate dehydrogenase 1-like protein [Danio rerio]	gi|54400366	38259.6	5.45	11	463	100	411	100
	44	I20		inorganic pyrophosphatase [Danio rerio]	gi|62955639	32621.8	5.25	15	333	100	231	100
	45	I21		RecName: Full=Serine/arginine-rich splicing factor 1A; AltName: Full=Splicing factor, arginine/seri	gi|269849649	28366	10.3	13	441	100	349	100	could be hit#7: pyrophosphatase 1
	46	I22		guanine nucleotide-binding protein G(I)/G(S)/G(T) subunit beta-1 [Danio rerio]	gi|47086811	37262	5.6	13	712	100	628	100
	47	I23		methylosome protein 50 [Danio rerio]	gi|41054711	35062.3	5.84	14	791	100	689	100
	48	I24		heterogeneous nuclear ribonucleoprotein A/B [Danio rerio]	gi|47086935	34227.3	6.85	10	230	100	184	100	see detail
	49	J1		cytosolic malate dehydrogenase A [Danio rerio]	gi|29242793	36234.8	6.96	14	836	100	743	100
	50	J2		RecName: Full=L-lactate dehydrogenase B-A chain; Short=LDH-B-A	gi|313104308	36224	6.4	6	245	100	222	100	see detail hit#2: prostaglandin reductase 1
	51	J3		annexin A1b [Danio rerio]	gi|32308159	37416.3	6.11	15	419	100	315	100
	52	J4		vitellogenin 1 [Danio rerio]	gi|21391474	21118.2	9	3	90	99.996	78	100
	53	J5		vitellogenin 1 [Danio rerio]	gi|94733730	149140	8.74	16	552	100	512	100
	54	J6		glyceraldehyde-3-phosphate dehydrogenase [Danio rerio]	gi|169403947	35761.3	8.2	9	593	100	545	100	see detail hits
	55	J7		malate dehydrogenase, mitochondrial [Danio rerio]	gi|47085883	35397.5	8.4	13	923	100	836	100	see detail hits
	56	J8		Hnrpa0l protein [Danio rerio]	gi|112180524	32001.9	7.62	5	162	100	143	100	also see detail hit#2
	57	J9		carbonyl reductase [NADPH] 1 [Danio rerio]	gi|35902843	29960.3	6.89	12	595	100	513	100
	58	J10		guanine nucleotide-binding protein subunit beta-2-like 1 [Danio rerio]	gi|18859301	35100.5	7.6	22	1200	100	991	100
	59	J11		hypothetical protein LOC678590 [Danio rerio]	gi|94536906	28172.9	6.78	5	527	100	504	100	see detail hits
	60	J12		EF-hand domain-containing protein D2 [Danio rerio]	gi|113680776	26494.4	5.56	14	406	100	306	100
	61	J13		eukaryotic translation initiation factor 3, subunit F-like [Danio rerio]	gi|317108137	30037.3	5.36	11	325	100	250	100
	62	J14		Vtg1 protein [Danio rerio]	gi|63100501	36409.1	9.23	16	853	100	738	100
	63	J15		nonspecific cytotoxic cell receptor protein 1 [Danio rerio]	gi|169790804	27238.5	5.55	11	914	100	829	100
	64	J16		peroxiredoxin-4 [Danio rerio]	gi|148226847	29083.8	6.3	13	675	100	574	100
	65	J17		peroxiredoxin-4 [Danio rerio]	gi|148226847	29083.8	6.3	13	565	100	466	100
	66	J18		ubiquitin carboxyl-terminal hydrolase isozyme L1 [Danio rerio]	gi|41393111	24232.8	5.1	9	384	100	327	100
	67	J19		apolipoprotein A-I precursor [Danio rerio]	gi|18858281	30237.5	5.06	16	384	100	269	100	could be hit#3: NADH dehydrogenase [ubiquinone] flavoprotein 2
	68	J20		tubulin alpha-1C chain [Danio rerio]	gi|300244537	49937.5	4.97	7	561	100	537	100	fragment?
	69	J21		Vtg1 protein [Danio rerio]	gi|63100501	36409.1	9.23	9	383	100	341	100
	70	J22		peroxiredoxin-1 [Danio rerio]	gi|61806512	21975.2	6.42	15	760	100	617	100
	71	J23		Vtg1 protein [Danio rerio]	gi|63100501	36409.1	9.23	13	592	100	514	100
	72	J24		Vtg1 protein [Danio rerio]	gi|63100501	36409.1	9.23	11	649	100	589	100
	73	K1		Vtg1 protein [Danio rerio]	gi|63100501	36409.1	9.23	8	387	100	349	100
	74	K2		Vtg1 protein [Danio rerio]	gi|63100501	36409.1	9.23	8	421	100	384	100	see detail hit#6 #9, could be Hsp25
	75	K3		Vtg1 protein [Danio rerio]	gi|63100501	36409.1	9.23	16	777	100	664	100
	76	K4		phosphatidylethanolamine binding protein [Danio rerio]	gi|54312133	20848.3	6.31	8	434	100	378	100
	77	K5		vitellogenin 1 [Danio rerio]	gi|166795887	149452	8.68	11	317	100	299	100	see detail hit#6
	78	K6		Vtg1 protein [Danio rerio]	gi|145337918	116566	9.07	8	335	100	321	100	see detail hit#5
	79	K7		Vtg1 protein [Danio rerio]	gi|63100501	36409.1	9.23	15	845	100	742	100
	80	K8		vitellogenin 1 [Danio rerio]	gi|94733730	149140	8.74	12	674	100	652	100
	81	K9		vitellogenin 7 [Danio rerio]	gi|57864789	24318.7	8.37	16	711	100	564	100
	82	K10		PREDICTED: cathepsin L1 [Danio rerio]	gi|189525870	38017.2	6.36	7	529	100	502	100	see detail hits#5,6,8,9,10
	83	K11		deoxyuridine 5'-triphosphate nucleotidohydrolase, mitochondrial [Danio rerio]	gi|54400512	20094.3	8.39	8	313	100	259	100
	84	K12		deoxyuridine 5'-triphosphate nucleotidohydrolase, mitochondrial [Danio rerio]	gi|54400512	20094.3	8.39	4	138	100	118	100
	85	K13		deoxyuridine 5'-triphosphate nucleotidohydrolase, mitochondrial [Danio rerio]	gi|54400512	20094.3	8.39	4	158	100	138	100
	86	K14		glutathione peroxidase 4B [Danio rerio]	gi|194462986	19207.5	6.73	10	305	100	231	100	also see detail hit#4,5
	87	K15		cofilin 2, like [Danio rerio]	gi|47271384	18758.6	6.84	9	209	100	152	100
	88	K16		nucleoside diphosphate kinase-Z1 [Danio rerio]	gi|6644111	17282.9	7.77	10	334	100	254	100
	89	K17		peptidylprolyl isomerase A, like [Danio rerio]	gi|41152400	17477.6	8.26	6	185	100	152	100
	90	K18		glial fibrillary acidic protein [Danio rerio]	gi|239596173	19203.6	4.89	6	108	100	77	100
	91	K19		glial fibrillary acidic protein [Danio rerio]	gi|239596173	19203.6	4.89	6	108	100	76	100	see detail hit#7
	92	K20		vitellogenin 1 [Danio rerio]	gi|166795887	149452	8.68	17	455	100	409	100
	93	K21		vitellogenin 2 isoform 1 [Danio rerio]	gi|113678458	179783	8.7	11	173	100	158	100	also see detail hit#9, 10
	94	K22		hypothetical protein LOC678536 [Danio rerio]	gi|160420306	148750	8.89	25	786	100	677	100
	95	K23		fast skeletal myosin alkali light chain 1 [Danio rerio]	gi|41053385	20918.4	4.63	12	441	100	344	100
	96	K24		myosin, light polypeptide 2, skeletal muscle [Danio rerio]	gi|18859049	18853.3	4.68	7	250	100	208	100
	high confidence
	low confidence
	no confidence
