# Supplementary material for: Matriptase activation of Gq drives epithelial disruption and inflammation via RSK and DUOX
Source: eLife. 2021 Jun 24;10:e66596. doi: 10.7554/eLife.66596 (PMC8291973; doi:10.7554/eLife.66596)
Supplement: Figure 1—source data 2. [file elife-66596-fig1-data2.xls]

## Sheet: Gel-1
	NGSE110527 Gel-1 ratios						NGSE110527 Gel-2 ratios
			Gel-1	Gel-1	Gel-1			Gel-2	Gel-2	Gel-2
	Assigned Spot#	Original No.	T419-24 / WT-24	Ti251-24 / WT-24	Ti251-24 / T419-24		Original No.	T419-48 / WT-48	Ti251-48 / WT-48	Ti2517-48 / T419-48		Mass Spec ID Selection
	1	153	-1.98	-1.39	1.42		154	-1.64	-1.12	1.46
	2	216	-1.22	1.33	1.61		224	1.06	-1.27	-1.34
	3	302	1.41	1.57	1.11		311	1.38	1.3	-1.06
	4	255	-1.23	-1.51	-1.24		276	-1.17	-1.22	-1.03
	5	332	-1.42	-1.17	1.2		339	-1.57	-1.47	1.07
	6	374	1.35	1.17	-1.16		373	1.63	1.13	-1.44
	7	375	-1.62	-1.62	-1		378	-2.89	-2.15	1.35
	8	419	-1.28	-1.55	-1.22		407	-1.13	-1.25	-1.11
	9	455	1.46	1.47	1		459	1.44	1.08	-1.33
	10	451	1.44	1.39	-1.04		463	2.1	1.82	-1.16
	11	540	-1.65	-1.52	1.08		553	-1.34	-1.57	-1.17
	12	493	-1.64	-1.37	1.19		503	-1.53	-1.07	1.44
	13	495	1.23	1.07	-1.15		504	1.8	1.46	-1.24
	14	528	-1.37	-1.27	1.07		527	-1.85	-1.65	1.12
	15	585	-2.6	-2.41	1.07		593	-3.69	-3.92	-1.06
	16	575	-1.52	-1.4	1.08		584	-1.19	-1.21	-1.01
	17	551	1.61	1.22	-1.32		562	1.34	-1	-1.35
	18	554	1.3	1.54	1.18		563	-1.07	1.12	1.2
	19	555	-1.54	-1.51	1.02		564	-2.02	-1.76	1.15
	20	506	1.95	1.45	-1.35		518	-1.37	1.29	1.77
	21	818	-1.57	-1.42	1.1		852	-2.73	-2.29	1.2
	22	775	1.06	-1	-1.07		809	1.45	1.53	1.05
	23	788	1.03	1.01	-1.02		823	-2.23	-2.77	-1.24
	24	753	-1.5	-1.41	1.06		761	-1.27	1.07	1.36
	25	848	-1.54	-1.43	1.07		844	-2.3	-2.66	-1.15
	26	889	-1.55	-1.12	1.38		894	-2.13	-1.09	1.96
	27	941	-1.63	-1.69	-1.04		929	-1.59	-1.85	-1.17
	28	945	1.33	2.7	2.02		936	-1.4	2.58	3.6
	29	983	-1.43	-2.04	-1.43		976	1.07	-1.56	-1.67
	30	968	-1.03	1.84	1.88		973	-1.33	1.45	1.93
	31	1047	-1.64	-1.61	1.02		1048	-1.18	-1.2	-1.01
	32	1073	-1.72	-1.77	-1.03		1078	-2.29	-1.94	1.18
	33	903	-1.27	-1.5	-1.19		918	1.18	-1.29	-1.51
	34	917	1.19	-1.42	-1.71		925	2.26	1	-2.25
	35	1005	-1.27	-1.17	1.08		1009	-1.55	-1.19	1.31
	36	1059	-1.34	-1.3	1.03		1069	-1.47	-1.6	-1.09
	37	1153	-1.54	-1.41	1.08		1152	-1.53	-1.5	1.02
	38	1162	-2.36	-2.6	-1.11		1157	-1.72	-2.95	-1.71
	39	923	1.14	-1.05	-1.2		926	1.34	-1.33	-1.78
	40	984	1.38	-1.12	-1.56		977	-1.46	-1.09	1.34
	41	1091	-1.3	-1.12	1.16		1097	-1.87	-1.38	1.36
	42	1170	-1.13	-1.41	-1.25		1169	1.01	-1.59	-1.61
	43	1207	-1.47	-1.31	1.12		1198	-1.05	1.03	1.08
	44	1283	2.54	2.29	-1.12		1269	1.57	1.16	-1.35
	45	1287	-1.64	-1.95	-1.2		1267	-1.34	-1.2	1.12
	46	1298	-1.08	-1.03	1.05		1276	-1.45	1.07	1.55
	47	1248	-1.52	-1.28	1.19		1232	1.04	1.32	1.28
	48	1249	1.2	1.02	-1.19		1237	1.62	1.31	-1.23
	49	1273	-1.51	1.1	1.65		1261	-2.11	1.17	2.48
	50	1295	1.85	2.25	1.21		1324	1.88	1.07	-1.75
	51	1349	-1.66	-1.26	1.31		1329	-2.65	-1.47	1.81
	52	1384	-1.08	-1.02	1.05		1357	-1.53	-3.24	-2.11
	53	1449	-1.84	-1.29	1.41		1434	-1.81	-1.05	1.73
	54	1374	-1.09	-1.33	-1.23		1345	1.43	-1.12	-1.6
	55	1312	-1.24	-1.36	-1.1		1310	-2.3	-2.89	-1.25
	56	1337	1.19	1.34	1.12		1334	-1.79	-1.53	1.18
	57	1494	-1.16	-1.32	-1.15		1475	-1.7	1.09	1.86
	58	1443	1.15	-1.22	-1.41		1423	1.67	-1.15	-1.91
	59	1541	-2.01	-2.26	-1.13		1527	-1.47	-1.23	1.19
	60	1505	2.56	1.78	-1.44		1483	2.31	1.67	-1.38
	61	1552	3.51	1.77	-1.99		1534	1.08	1.04	-1.04
	62	1553	2.51	1.57	-1.61		1522	-1.27	-1.24	1.03
	63	1560	2.03	1.76	-1.15		1543	1.11	1.14	1.03
	64	1681	-3.68	-4.32	-1.18		1664	-1.46	-2.28	-1.56
	65	1679	1.8	1.64	-1.1		1665	1.26	1.07	-1.18
	66	1703	1.36	-1.15	-1.57		1693	-1.15	-1.35	-1.17
	67	1709	-1.37	-1.48	-1.08		1702	-1.43	-1.55	-1.08
	68	1754	-1.6	-1.45	1.1		1694	1.42	1.14	-1.25
	69	1802	6.07	3	-2.04		1751	1.12	1.2	1.08
	70	1836	1.27	1.53	1.2		1810	1.52	1.34	-1.14
	71	1808	17.55	12.68	-1.39		1788	6.36	2.62	-2.42
	72	1809	5.96	4.42	-1.35		1789	2.7	1.86	-1.45
	73	1790	-7.96	-5.29	1.5		1785	1	1.09	1.09
	74	1791	1.63	2.22	1.36		1768	1.71	3.05	1.78
	75	1818	1.32	-1.06	-1.41		1798	-2.03	1.39	2.82
	76	1870	1.02	1.57	1.54		1845	1.2	1.44	1.2
	77	1755	2.06	1.44	-1.44		1727	8.97	8.54	-1.05
	78	1740	1.08	-1.31	-1.42		1710	-2.19	-1.19	1.84
	79	1815	1.44	1.04	-1.39		1796	-1.79	1.34	2.41
	80	1712	1.53	1.34	-1.15		1690	-1.27	1.39	1.78
	81	1810	1.5	1.61	1.07		1781	1.49	2.03	1.37
	82	1741	-1.02	-1.23	-1.22		1687	-1.84	1.35	2.49
	83	1963	1.82	2.04	1.12		1921	1.43	1.66	1.16
	84	1990	-1.53	-2.05	-1.35		1939	1.11	-1.47	-1.63
	85	1984	1.77	2.18	1.23		1942	1.3	1.71	1.32
	86	2014	2.1	2.28	1.08		1959	1.39	-1.1	-1.53
	87	2070	1.18	-1.16	-1.37		2023	1.55	-1.13	-1.76
	88	2189	1.46	-1.06	-1.55		2149	-1.72	-1.63	1.06
	89	2162	1.3	-1.24	-1.62		2100	1.61	-1.43	-2.3
	90	2337	-4.05	-3.34	1.21		2265	-2.12	-2.75	-1.3
	91	2372	-1.03	1.56	1.6		2288	2.06	1.82	-1.13
	92	2368	1.19	-1.03	-1.23		2273	-2.05	-1.63	1.26
	93	2362	1.27	-1.13	-1.44		2269	-2.35	-2.15	1.09
	94	272	2.21	1.1	-2.01		270	-1.16	1.58	1.84
	95	1745	-1.62	-1.37	1.18		1748	-1.57	-1.31	1.2
	96	2011	-1.48	-2.03	-1.38		1972	-1.47	-2.76	-1.88

## Sheet: Gel-2
NGSE110527 Gel-2
Assigned ID	Original No.	T419-48 / WT-48	Ti251-48 / WT-48	Ti251-48 / T419-48
1	154	-1.64	-1.12	1.46
2	224	1.06	-1.27	-1.34
3	311	1.38	1.3	-1.06
4	276	-1.17	-1.22	-1.03
5	339	-1.57	-1.47	1.07
6	373	1.63	1.13	-1.44
7	378	-2.89	-2.15	1.35
8	407	-1.13	-1.25	-1.11
9	459	1.44	1.08	-1.33
10	463	2.1	1.82	-1.16
11	553	-1.34	-1.57	-1.17
12	503	-1.53	-1.07	1.44
13	504	1.8	1.46	-1.24
14	527	-1.85	-1.65	1.12
15	593	-3.69	-3.92	-1.06
16	584	-1.19	-1.21	-1.01
17	562	1.34	-1	-1.35
18	563	-1.07	1.12	1.2
19	564	-2.02	-1.76	1.15
20	518	-1.37	1.29	1.77
21	852	-2.73	-2.29	1.2
22	809	1.45	1.53	1.05
23	823	-2.23	-2.77	-1.24
24	761	-1.27	1.07	1.36
25	844	-2.3	-2.66	-1.15
26	894	-2.13	-1.09	1.96
27	929	-1.59	-1.85	-1.17
28	936	-1.4	2.58	3.6
29	976	1.07	-1.56	-1.67
30	973	-1.33	1.45	1.93
31	1048	-1.18	-1.2	-1.01
32	1078	-2.29	-1.94	1.18
33	918	1.18	-1.29	-1.51
34	925	2.26	1	-2.25
35	1009	-1.55	-1.19	1.31
36	1069	-1.47	-1.6	-1.09
37	1152	-1.53	-1.5	1.02
38	1157	-1.72	-2.95	-1.71
39	926	1.34	-1.33	-1.78
40	977	-1.46	-1.09	1.34
41	1097	-1.87	-1.38	1.36
42	1169	1.01	-1.59	-1.61
43	1198	-1.05	1.03	1.08
44	1269	1.57	1.16	-1.35
45	1267	-1.34	-1.2	1.12
46	1276	-1.45	1.07	1.55
47	1232	1.04	1.32	1.28
48	1237	1.62	1.31	-1.23
49	1261	-2.11	1.17	2.48
50	1324	1.88	1.07	-1.75
51	1329	-2.65	-1.47	1.81
52	1357	-1.53	-3.24	-2.11
53	1434	-1.81	-1.05	1.73
54	1345	1.43	-1.12	-1.6
55	1310	-2.3	-2.89	-1.25
56	1334	-1.79	-1.53	1.18
57	1475	-1.7	1.09	1.86
58	1423	1.67	-1.15	-1.91
59	1527	-1.47	-1.23	1.19
60	1483	2.31	1.67	-1.38
61	1534	1.08	1.04	-1.04
62	1522	-1.27	-1.24	1.03
63	1543	1.11	1.14	1.03
64	1664	-1.46	-2.28	-1.56
65	1665	1.26	1.07	-1.18
66	1693	-1.15	-1.35	-1.17
67	1702	-1.43	-1.55	-1.08
68	1694	1.42	1.14	-1.25
69	1751	1.12	1.2	1.08
70	1810	1.52	1.34	-1.14
71	1788	6.36	2.62	-2.42
72	1789	2.7	1.86	-1.45
73	1785	1	1.09	1.09
74	1768	1.71	3.05	1.78
75	1798	-2.03	1.39	2.82
76	1845	1.2	1.44	1.2
77	1727	8.97	8.54	-1.05
78	1710	-2.19	-1.19	1.84
79	1796	-1.79	1.34	2.41
80	1690	-1.27	1.39	1.78
81	1781	1.49	2.03	1.37
82	1687	-1.84	1.35	2.49
83	1921	1.43	1.66	1.16
84	1939	1.11	-1.47	-1.63
85	1942	1.3	1.71	1.32
86	1959	1.39	-1.1	-1.53
87	2023	1.55	-1.13	-1.76
88	2149	-1.72	-1.63	1.06
89	2100	1.61	-1.43	-2.3
90	2265	-2.12	-2.75	-1.3
91	2288	2.06	1.82	-1.13
92	2273	-2.05	-1.63	1.26
93	2269	-2.35	-2.15	1.09
94	270	-1.16	1.58	1.84
95	1748	-1.57	-1.31	1.2
96	1972	-1.47	-2.76	-1.88
